# Supplementary material for: Olfactory receptor accessory proteins play crucial roles in receptor function and gene choice
Source: eLife. 2017 Mar 6;6:e21895. doi: 10.7554/eLife.21895 (PMC5362263; doi:10.7554/eLife.21895)
Supplement: Figure 2—source data 1. — DOI: http://dx.doi.org/10.7554/eLife.21895.005 [file elife-21895-fig2-data1.xlsx]

## Sheet: OE thickness
	wild-type				RTP1,2DKO
anterior VNO	94.92	86.54	86.76	80.13	89.41	79.03	92.28	85.43
Middle VNO	93.82	87.64	98.9	101.55	91.61	77.93	79.47	79.47
posterior VNO	97.13	89.85	97.13	89.85	81.24	74.39	103.09	75.06
anterior OB	114.13	87.64	93.38	97.13	104.42	94.26	77.26	79.47
Middle OB	111.26	107.51	111.92	145.04	87.64	78.81	91.17	145.7

## Sheet: OMP_matchedsections
	wild-type	RTP1,2DKO
anterior VNO	65.3195	43.9414
Middle VNO	64.8758	45.6493
posterior VNO	72.5362	49.1647
anterior OB	71.5686	53.8492
Middle OB	73.3728	50.8477

## Sheet: OMP_all ages
1 day		21 days		6 months
Het	RTP1,2DKO	Wild-type	RTP1,2DKO	Wild-type	RTP1,2DKO
51.2889	18.9842	64.8758	43.9414	66.2094	66.8417
55.0599	25.3059	65.3195	45.6493	62.6787	59.7752
55.587	27.3964	65.9198	49.1647	71.6412	63.9946
56.129	37.0487	66.6109	50.8477
57.5033	38.7541	70.9946	53.8492
60.1866	39.3214	71.5093
62.2566	40.8714	72.9992
	41.8379	73.0751
		73.9082
		74.9372
		76.4223
		78.4616

## Sheet: ACIII_all ages
1 day		21 days		6 months
Het	RTP1,2DKO	Wild-type	RTP1,2DKO	Wild-type	RTP1,2DKO
4.48688	0.655226	35.8038	20.1879	60.0394	41.3728
1.80656	1.26378	36.17	25.0519	51.3645	42.0553
1.32156	0.555696	37.7743	25.8418	54.9755	46.2131
2.40537	0.230919	37.9869	26.0437	48.0703	51.791
2.96509	0.031814	40.8521	26.835
		43.3944	27.2911
		48.406	27.341
		55.3115	28.7529
		62.6441	31.1959
			31.3146

## Sheet: GAP43_all ages
1 day		21 days		6 months
Het	RTP1,2DKO	Wild-type	RTP1,2DKO	Wild-type	RTP1,2DKO
51.8216	50.4867	11.2069	16.0287	11.004	18.6749
54.1784	51.0698	17.0535	24.377	14.9077	16.4323
55.1842	53.3704	17.5325	24.7525	13.9642	17.9449
58.0917	53.8651	18.0941	25.5475
58.8649	54.5772	18.7	27.2
59.0663	55.8881	20.5982	27.2234
59.2719	56.3996	22.75	32.3245
60.9203	56.6509	23.3318	37.0157
66.9147	73.5723	25.3833
60.7828	58	27.6
58.9	71.0077
61.8	62.6
58.0055	59.1905
62	57.0519
60.7493
63.8
62.9152
