# Supplementary material for: Olfactory receptor accessory proteins play crucial roles in receptor function and gene choice
Source: eLife. 2017 Mar 6;6:e21895. doi: 10.7554/eLife.21895 (PMC5362263; doi:10.7554/eLife.21895)
Supplement: Figure 4—source data 1. — DOI: http://dx.doi.org/10.7554/eLife.21895.009 [file elife-21895-fig4-data1.xlsx]

## Sheet: Sheet1
	Wild-type	RTP1,2DKO
Olfr1356	0.377297	0.242476
Olfr922	0.416071	0.230353
Olfr1093	0.474377	0.159327
Olfr1106	0.845827	0.276683
Olfr1444	0.968468	0.197804
Olfr231	1.06379	0.211316
Olfr1344	1.19386	0.477626
Olfr522	1.21824	0.269578
Olfr1046	1.63299	0.390848
Olfr78	0.992032	1.48485
Olfr1289	0.927383	1.58389
Olfr1056	0.779041	1.59774
Olfr790	0.31965	1.76061
Olfr370	0.95911	1.83415
Olfr414	1.48906	3.09803
Olfr557	1.70407	3.16567
Olfr131	2.16712	3.70035
Olfr1370	1.87782	3.90625
