# Supplementary material for: Olfactory receptor accessory proteins play crucial roles in receptor function and gene choice
Source: eLife. 2017 Mar 6;6:e21895. doi: 10.7554/eLife.21895 (PMC5362263; doi:10.7554/eLife.21895)
Supplement: Figure 5—source data 1. — DOI: http://dx.doi.org/10.7554/eLife.21895.012 [file elife-21895-fig5-data1.xlsx]

## Sheet: uOR
1 day		21 days		6 months
Het	RTP1,2DKO	Wild-type	RTP1,2DKO	Wild-type	RTP1,2DKO
4.16326	2.48756	6.88318	1.96906	7.27612	2.38095
6.19224	1.94903	7.66509	2.74286	9.31142	3.49462
4.50132	2.5266	7.40394	1.7331	9.84615	2.48619
4.875	2.80236	10.4271	2.04573	10.9304	1.35708
3.67836	2.46114	11.2792	2.81996	12.6079	3.72493
		6.62983	1.92024	9.89811

## Sheet: oOR
1 day		21 days		6 months
Het	RTP1,2DKO	Wild-type	RTP1,2DKO	Wild-type	RTP1,2DKO
5.51948	5.07246	7.19589	24.1506	15.4145	64.1379
4.8401	7.26073	12.9382	26.2799	17.3861	57.3939
4.37956	7.49386	9.01034	21.0728	16.2953	58.8496
5.95784	9.95146	11.3966	25.3353	7.31707	54.1799
6.79771	8.40081	17.3913	20.7668
6.38104	6.59898	12.4711	22.2105
