# Supplementary material for: Olfactory receptor accessory proteins play crucial roles in receptor function and gene choice
Source: eLife. 2017 Mar 6;6:e21895. doi: 10.7554/eLife.21895 (PMC5362263; doi:10.7554/eLife.21895)
Supplement: Figure 6—source data 1. — DOI: http://dx.doi.org/10.7554/eLife.21895.014 [file elife-21895-fig6-data1.xlsx]

## Sheet: FACS data
Figure 6-Source data1
Table for underepresented ORs						Table for overepresented ORs
MOR	OR id	Geometric mean normalized to olfr78				MOR	OR id	Geometric mean normalized to olfr78
27-1	Olfr656	1.17833				18-2	Olfr78	100
194-1	Olfr1046	5.12821				276-2	Olfr1396	4.75297
142-1	Olfr1356	2.54135				267-15	Olfr479	6.44153
140-1	Olfr19	1.83867				182-13	Olfr194	28.7054
126-1	Olfr54	1.84698				138-6	Olfr366	4.50281
258-2	Olfr1339	0.69735				256-14	Olfr1370	20.1538
105-4	Olfr231	5.87867				103-10	Olfr414	19.2751
216-1	Olfr1323	2.85488				256-4	Olfr131	12.7018
279-1	Olfr165	2.93001				267-16	Olfr370	10.7545
212-1	Olfr1497	3.70107				112-1	Olfr790	2.08677
121-1	Olfr96	4.66588				256-8	Olfr1362	49.1283
179-6	Olfr1093	8.76063				18-1	Olfr558	15.0628
161-3	Olfr922	9.01702				258-5	Olfr62	1.25523
103-5	Olfr522	7.06692				180-1	Olfr1019	84.1044
172-6	Olfr1106	10.1142				132-1	Olfr24	4.97825
202-4	Olfr1444	10.8655				4-1	Olfr620	6.95927
3-1	Olfr631	10.3203				2-1	Olfr632	141.123
171-2	Olfr151	14.6348				5-1	Olfr638	5.37762
124-1	Olfr1344	19.8243				260-1	Olfr715	22.499
256-12	Olfr1361	20.9711				1-1	Olfr64	1.59984
171-3	Olfr160	12.4826				131-1	Olfr161	90.7473
