# Supplementary material for: Olfactory receptor accessory proteins play crucial roles in receptor function and gene choice
Source: eLife. 2017 Mar 6;6:e21895. doi: 10.7554/eLife.21895 (PMC5362263; doi:10.7554/eLife.21895)
Supplement: Figure 7—source data 1. — DOI: http://dx.doi.org/10.7554/eLife.21895.016 [file elife-21895-fig7-data1.xlsx]

## Sheet: Sheet1
oOR
		Het OMP +	Het OMP -	RTP1,2DKO OMP +	RTP1,2DKO OMP -
		Sum of +ve OMP	Sum of -ve OMP	Sum of +ve OMP	Sum of -ve OMP
MOR 112-1	Olfr790	9	0	21	1
MOR103-10	Olfr414	28	2	52	4
MOR186-2	Olfr1056	14	1	21	0
MOR245-6	Olfr1289	16	6	36	6
Olfr78	Olfr78	36	14	52	20
uOR
		Het OMP +	Het OMP -	RTP1,2DKO OMP +	RTP1,2DKO OMP -
		Sum of +ve OMP	Sum of -ve OMP	Sum of +ve OMP	Sum of -ve OMP
MOR 142-1	Olfr1356	15	1	2	2
MOR105-4	Olfr231	12	1	3	0
MOR161-3	Olfr922	11	1	3	1
MOR202-4	Olfr1444	9	1	1	3
Olfr923	Olfr923	34	11	4	14
