# Supplementary material for: Olfactory receptor accessory proteins play crucial roles in receptor function and gene choice
Source: eLife. 2017 Mar 6;6:e21895. doi: 10.7554/eLife.21895 (PMC5362263; doi:10.7554/eLife.21895)
Supplement: Figure 7—source data 2. — DOI: http://dx.doi.org/10.7554/eLife.21895.017 [file elife-21895-fig7-data2.xlsx]

## Sheet: 1 hr stimulation
Olfr1395		Olfr1395		Olfr923		Olfr923
No odor		1% TMT		No odor		1% Acetophenone
Het	RTP1,2DKO	Het	RTP1,2DKO	Het	RTP1,2DKO	Het	RTP1,2DKO
0.248929	-0.151329	3.21195	6.77099	1.10237	-0.120102	4.09906	-0.0131304
0.552503	0.202579	0.181811	5.77509	-0.110307	0.0409195	5.97503	-0.0526708
0.0878661	0.661539	0.00389105	2.5497	-0.146326	-0.0810456	5.50879	-0.259475
0.0875132	-0.0912423	7.12245	2.53233	0.0455057	-0.229272	2.71462	-0.520483
0.461108	-0.0941877	6.70909	1.96349	0.232084	0.736324	2.0696	-0.257996
0.26138	1.93736	0.977111	0.263004	-0.0767004	0.0320022	4.50052	0.00246016
-0.00438574	-0.200092	0.597369	6.04186	-0.186525	0.487278	1.4184	-0.419724
0.0581237	0.0143343	2.62782	0.104512	0.140055	-0.0427035	3.127
0.187579		-0.143327	2.7253	0.468028	0.508579	2.92021
0.393658		4.25632	5.63945	0.562899	-0.0613186	5.77563
0.241165		1.43577	-0.208032	0.0196173	0.678595	3.10885
-0.187827		1.00536	1.96452	-0.16262	0.587558	5.60809
0.236137		-0.0664555	0.936499	-0.281717		2.9406
0.301384		2.13608	7.90054	-0.0560647		4.55672
0.42065		5.86648	4.40609	-0.263708		2.67279
0.747441		0.511177	1.65594	-0.15667		5.74593
-0.0421939		3.55138	2.19835	-0.229405		-0.06687
0.467561		-0.399038	2.18101			1.87902
			2.08679
			3.89237
			6.90607
			0.30678
			1.06416
			2.59499
			0.146232
			-0.0347271
