# Supplementary material for: Olfactory receptor accessory proteins play crucial roles in receptor function and gene choice
Source: eLife. 2017 Mar 6;6:e21895. doi: 10.7554/eLife.21895 (PMC5362263; doi:10.7554/eLife.21895)
Supplement: Figure 8—source data 1. — DOI: http://dx.doi.org/10.7554/eLife.21895.019 [file elife-21895-fig8-data1.xlsx]

## Sheet: nATF5 double staining
Figure 8-Source data 1
	Wild-type	RTP1,2DKO			Wild-type	RTP1,2DKO
uORs	% nATF5 positive	% nATF5 positive		oORs	% nATF5 positive	% nATF5 positive
Olfr1344	0	11.1111		Olfr1056	25.7143	15
Olfr922	5	22.2222		Olfr131	26.3158	19.8582
Olfr1444	9.80392	27.2727		Olfr414	25	28.777
Olfr231	38.5965	36.3636		Olfr557	34.8837	37.1134
Olfr1356	4.34783	41.6667		Olfr790	28.5714	41.9355
Olfr1093	0	50		Olfr1289	59.6154	48.9362
Olfr522	10.9589	62.5
