# Supplementary material for: Olfactory receptor accessory proteins play crucial roles in receptor function and gene choice
Source: eLife journal article supplement (doi:10.7554/elife.21895), 2017-03-06

Figure 9-figure supplement 1

A

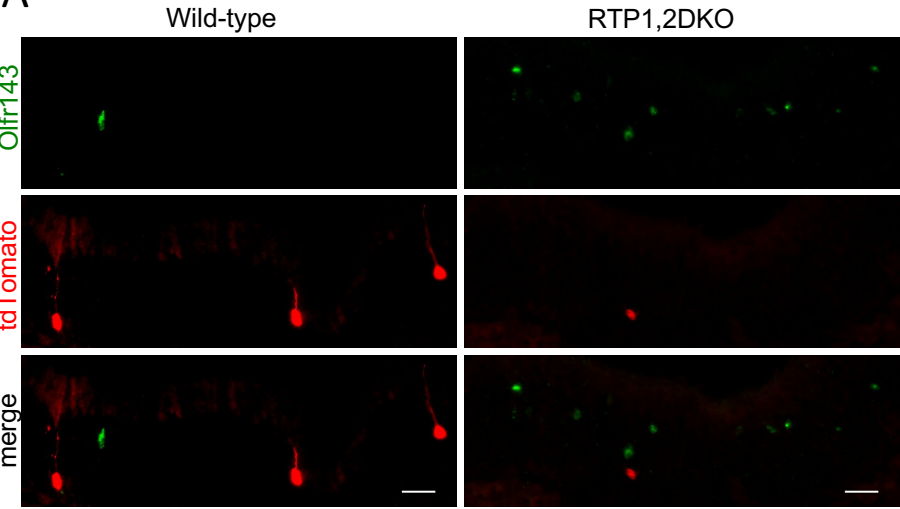

B

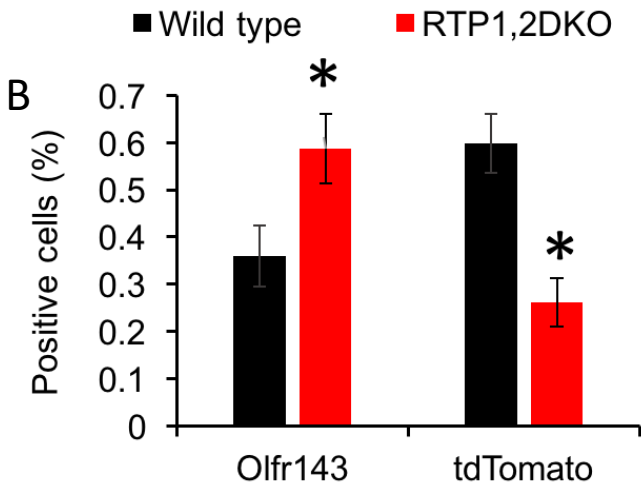

C

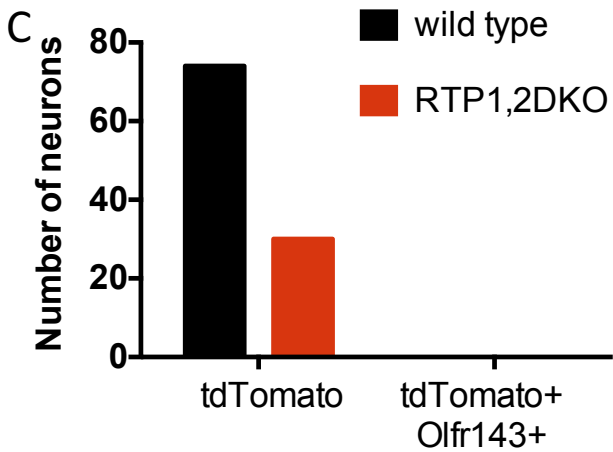

Supplement: supp [file elife-21895-supp-v1.zip]
