# Supplementary material for: Olfactory receptor accessory proteins play crucial roles in receptor function and gene choice
Source: eLife journal article supplement (doi:10.7554/elife.21895), 2017-03-06
Supplement: supp [file elife-21895-supp-v1.zip]

Figure 4-figure supplement 1

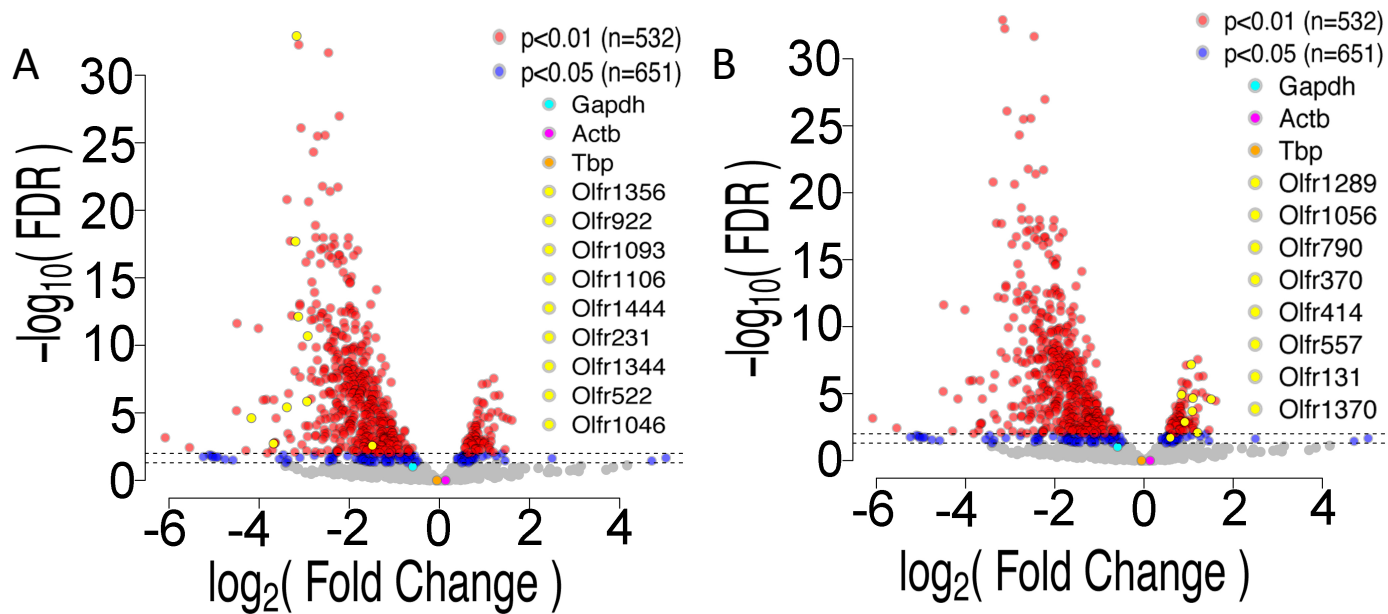

C

| Number of OR genes |                  |                 |                 |
|--------------------|------------------|-----------------|-----------------|
| Data set used      | Underrepresented | Overrepresented | Not significant |
| All genes          | 535              | 116             | 437             |
| OR genes           | 503              | 175             | 410             |
