# Supplementary material for: Olfactory receptor accessory proteins play crucial roles in receptor function and gene choice
Source: eLife journal article supplement (doi:10.7554/elife.21895), 2017-03-06
Supplement: supp [file elife_poa_e21895_Supplementary_table_1.xlsx]

## Sheet: Supplemental table 1.csv
Supplementary Table 1
	id	logFC	FDR	Wild-type1	Wild-type2	Wild-type3	RTP1,2DKO1	RTP1,2DKO2	RTP1,2DKO3
1	Rtp2	-8.4361	2.74086e-198	4995	4519	3184	8	10	20
2	Rtp1	-7.69563	3.33326e-129	17777	23747	10593	77	81	95
3	Gm4070	-8.34972	3.21797e-66	361	321	346	0	0	3
4	Mup2	-11.8421	3.74301e-40	0	1204	0	0	0	0
5	Olfr1046	-3.16827	5.65682e-33	359	541	373	39	68	45
6	E330012B07Rik	-8.5428	6.16721e-33	376	179	1	0	0	1
7	Olfr693	-3.12104	3.61636e-32	621	728	453	94	88	43
8	Olfr533	-2.46189	1.83929e-31	1132	1483	1250	226	238	278
9	Olfr124	-2.22085	1.07847e-26	2301	1965	1432	479	355	446
10	Olfr1162	-3.0717	9.09824e-26	338	455	359	48	47	49
11	Olfr923	-2.5362	3.47956e-25	533	592	629	112	108	100
12	Olfr819	-2.70272	4.31681e-25	437	549	537	81	103	66
13	Olfr706	-2.79409	6.81974e-24	446	412	219	50	79	36
14	Faim2	-1.55399	1.9139e-22	6862	6160	4845	1903	2402	2112
15	Mslnl	-1.65636	1.9139e-22	2436	2190	1703	637	832	653
16	Olfr652	-2.59467	2.16306e-21	287	415	303	43	88	51
17	Olfr59	-2.25178	2.61577e-21	691	697	384	109	161	117
18	Olfr592	-2.42582	5.54197e-21	663	963	623	155	146	135
19	Olfr68	-3.38255	2.29689e-20	157	236	172	16	20	21
20	Olfr884	-2.90166	3.43894e-20	285	426	299	46	43	52
21	Olfr1025-ps1	-2.18875	1.15865e-18	426	683	497	107	134	128
22	Olfr1006	-2.74961	1.88441e-18	228	353	218	36	46	42
23	Stoml3	-2.01503	9.05825e-18	11871	16422	12001	4038	3935	2672
24	Olfr1463	-2.74268	1.52193e-17	258	343	195	41	42	40
25	Olfr665	-2.57524	1.52193e-17	237	233	262	37	42	52
26	Olfr878	-2.34466	1.55489e-17	368	391	340	76	71	82
27	Olfr531	-2.0157	1.65508e-17	444	621	475	122	157	124
28	Olfr1461	-3.30748	2.91883e-17	222	290	142	25	18	24
29	Olfr522	-3.19353	3.19563e-17	236	231	184	37	30	12
30	Olfr867	-2.32532	5.50504e-17	320	331	232	63	75	49
31	Olfr6	-2.03509	6.41848e-17	1373	1761	1299	415	321	405
32	Olfr332	-2.41235	9.13155e-17	353	465	321	87	86	55
33	Olfr705	-2.57015	1.00048e-16	308	499	293	59	63	69
34	Olfr1443	-2.63414	1.35576e-16	533	508	448	101	50	112
35	Olfr281	-1.81386	1.55948e-16	680	509	528	189	182	145
36	Olfr1096-ps1	-2.70615	1.55948e-16	327	450	226	49	50	58
37	Olfr1225	-2.86094	3.19867e-16	165	223	139	24	33	20
38	Olfr532	-2.21577	3.49138e-16	309	585	274	71	116	73
39	Olfr1253	-2.23193	3.49138e-16	287	362	311	63	92	64
40	Olfr309	-1.90376	3.798e-16	1120	1701	902	372	372	283
41	Olfr541	-2.45336	3.90213e-16	254	319	243	44	53	61
42	Kirrel2	-1.24147	4.48008e-16	2604	5258	6687	949	2652	3279
43	Olfr1408	-2.38119	5.90921e-16	210	304	255	42	67	49
44	Olfr1326-ps1	-2.71126	7.71195e-16	402	494	321	81	47	68
45	Olfr787	-2.13831	8.51425e-16	361	400	271	83	104	63
46	Olfr683	-2.95912	1.16992e-15	142	186	181	25	25	19
47	Olfr506	-2.6356	1.53234e-15	210	260	202	42	38	34
48	Olfr1389	-2.26299	1.53234e-15	386	443	293	101	88	60
49	Olfr788	-2.1329	6.78246e-15	447	431	323	91	89	108
50	Olfr1228	-1.95302	1.40685e-14	598	424	414	170	94	132
51	Olfr1325	-2.04355	2.12054e-14	390	358	260	92	107	62
52	Pcdhb1	-1.29513	3.51079e-14	2667	1865	1638	967	843	807
53	Olfr598	-2.82895	3.56646e-14	279	668	418	72	59	61
54	Olfr523	-1.97586	3.7176e-14	394	379	278	97	106	79
55	Olfr741	-1.98761	4.37064e-14	634	798	663	158	158	254
56	Adcy3	-1.40928	9.25618e-14	14057	10630	8955	3923	4934	4401
57	Sema7a	-1.47233	1.27148e-13	3360	2417	2462	791	1290	1090
58	Olfr536	-1.39361	1.27148e-13	2310	1759	1805	806	627	951
59	Olfr69	-2.7702	2.03447e-13	108	154	139	13	27	24
60	Cmip	-1.31143	7.99836e-13	13980	12719	11412	4707	6536	5147
61	Olfr1015	-3.09512	1.40508e-12	95	230	111	19	19	13
62	Olfr1154	-2.72954	1.48722e-12	137	213	178	30	25	28
63	Olfr1264	-1.52299	1.59603e-12	1035	989	953	368	315	421
64	Kirrel3	-1.56718	1.61693e-12	659	500	476	192	188	199
65	Olfr610	-3.09491	1.96461e-12	107	193	133	9	16	32
66	Olfr689	-1.9929	2.08122e-12	250	395	281	71	97	77
67	Olfr548-ps1	-3.06055	2.48685e-12	110	111	97	12	19	10
68	Olfr868	-2.41664	2.89758e-12	346	568	341	110	80	59
69	Olfr535	-1.9891	3.27497e-12	475	480	421	146	93	132
70	Olfr146	-2.84014	4.57094e-12	93	154	136	17	26	14
71	Olfr921	-1.8901	4.81256e-12	351	411	261	106	115	72
72	Gm1987	9.39268	5.3775e-12	0	0	0	0	307	0
73	Olfr1097	-2.17562	5.48538e-12	421	435	348	96	67	124
74	Olfr695	-2.08081	5.77038e-12	223	304	257	58	64	74
75	Olfr1140	-2.58502	6.91233e-12	103	182	112	18	34	19
76	Olfr601	-2.61194	6.9869e-12	176	265	240	46	50	24
77	Olfr1240	-1.94627	7.65389e-12	260	359	214	70	95	63
78	Cngb1	-1.1547	8.66242e-12	4663	5625	4525	2272	2804	2015
79	Olfr1047	-3.27468	1.06868e-11	90	122	75	10	18	5
80	Olfr1437	-1.85444	1.06868e-11	535	828	566	194	179	182
81	Olfr1093	-3.13224	1.29346e-11	135	128	62	18	10	10
82	Olfr1030	-2.64685	1.33828e-11	189	391	222	48	37	44
83	Lrrn1	-1.08221	1.55233e-11	4291	4584	4424	2081	2449	2147
84	Olfr93	-2.4754	1.59949e-11	172	216	123	18	50	33
85	Olfr622	-2.77522	1.95288e-11	127	160	175	30	15	27
86	Olfr961	-2.84583	2.30375e-11	132	194	103	28	18	16
87	Olfr1099	-2.11901	3.59735e-11	245	341	232	73	63	61
88	Olfr618	-2.48823	3.72194e-11	140	175	141	35	27	24
89	Olfr937	-4.49147	4.12764e-11	60	100	62	2	11	0
90	Tusc5	-1.41313	4.28473e-11	1904	2111	1241	881	681	524
91	Olfr389	-1.86229	4.58364e-11	358	388	273	96	95	103
92	Scn4b	-1.16511	5.02848e-11	2722	4554	4255	1387	2237	1804
93	Olfr1018	-1.5744	5.57685e-11	650	816	411	215	248	186
94	Olfr694	-2.09132	8.71897e-11	262	382	118	63	75	40
95	Olfr1366	-2.64704	8.89266e-11	116	135	112	23	18	20
96	Olfr1495	-4.0148	9.6043e-11	67	77	57	3	9	2
97	Olfr584	-2.42564	9.6043e-11	131	403	206	38	51	45
98	Olfr455	-1.87188	1.21958e-10	393	394	353	143	103	89
99	Olfr12	-1.6544	1.26096e-10	394	349	346	106	151	113
100	Plxna3	-1.01625	1.50917e-10	3881	4188	4127	1898	2474	2060
101	Olfr910	-2.29645	1.53719e-10	277	490	267	65	61	90
102	Olfr1412	-2.29503	1.67339e-10	192	234	124	46	38	32
103	Pde4a	-1.06665	1.68949e-10	9001	7552	6715	3405	4601	3782
104	Olfr1427	-1.60174	3.101e-10	446	452	306	120	164	134
105	Olfr224	-2.16981	3.15791e-10	178	150	165	40	33	43
106	Olfr231	-2.92164	3.62509e-10	147	180	79	23	12	19
107	Olfr1036	-2.14596	3.66273e-10	134	215	195	21	55	63
108	Olfr1426	-2.33847	4.01931e-10	161	222	158	46	37	30
109	Olfr211	-1.41241	4.80245e-10	665	791	566	269	362	192
110	Olfr17	-2.05268	5.19748e-10	300	537	306	98	88	95
111	Olfr721-ps1	-2.40984	6.35042e-10	109	177	103	15	34	30
112	Olfr1177-ps	-1.98072	6.4642e-10	160	318	193	49	75	53
113	Cnga4	-1.18478	6.71466e-10	2173	2909	2057	994	1176	1130
114	D430042O09Rik	-0.995936	8.49438e-10	4166	4096	3710	2142	2364	1880
115	Olfr1222	-1.61956	8.99831e-10	286	430	268	89	159	96
116	Olfr958	-2.40872	9.56435e-10	116	156	109	25	39	15
117	Olfr764	-4.72389	9.91713e-10	83	98	90	11	0	2
118	Olfr813	-2.34804	9.91713e-10	102	175	149	24	48	20
119	Olfr390	-1.71342	1.50675e-09	303	345	288	105	103	94
120	Olfr237-ps1	-1.8861	1.82399e-09	220	327	187	71	79	57
121	Olfr250	-3.04042	1.98388e-09	219	34	194	14	15	17
122	Olfr1260	-1.73394	2.02539e-09	481	699	383	181	153	150
123	Olfr1044	-1.88633	2.05083e-09	245	309	218	77	69	73
124	Olfr147	-2.48322	2.14086e-09	82	122	128	17	19	27
125	Pde1c	-1.02361	2.2629e-09	5742	6181	4093	2641	3058	2555
126	Olfr19	-2.4628	2.38835e-09	110	109	116	12	26	29
127	Olfr452	-2.73288	2.39691e-09	88	117	98	18	21	10
128	Ano2	-1.14692	2.45202e-09	3701	2690	2245	1163	1527	1382
129	Olfr1263	-1.92703	2.52052e-09	489	575	424	158	94	168
130	Olfr1369-ps1	-1.69455	2.587e-09	499	486	340	170	117	144
131	Olfr1224-ps1	-2.08588	2.71148e-09	143	215	144	38	47	39
132	Olfr1252	-2.07415	2.96878e-09	311	618	231	103	93	74
133	Olfr1129	-1.97575	3.19509e-09	213	219	150	42	57	57
134	Cdh23	-1.13559	3.29962e-09	1158	1026	994	519	557	459
135	Olfr1176	-1.90774	3.43093e-09	287	416	342	97	157	58
136	Olfr394	-2.31509	3.83535e-09	231	186	140	40	26	53
137	Olfr358	-2.37785	4.23558e-09	141	213	196	40	55	21
138	Olfr235	-2.06067	4.50296e-09	147	244	151	44	68	29
139	Olfr60	-1.56009	4.50296e-09	679	840	577	248	219	280
140	Dlg2	-1.05215	4.54371e-09	1908	2532	2372	977	1272	1236
141	Olfr1211	-1.79247	4.81958e-09	250	258	205	75	68	74
142	Olfr132	-2.10415	5.00285e-09	140	181	120	32	63	21
143	Olfr1340	-1.72784	5.00285e-09	248	344	387	77	155	90
144	Lipf	-2.55658	5.23807e-09	30	202	107	2	50	21
145	Dyrk4	-1.1821	6.19751e-09	822	1037	1022	362	568	433
146	Olfr1454	-2.24613	8.01111e-09	132	128	93	20	37	23
147	Olfr32	-1.62351	1.14966e-08	368	589	352	137	153	149
148	Ppp2r2c	-0.977549	1.14966e-08	3093	3656	2648	1585	1937	1525
149	Ctxn3	-1.19699	1.22732e-08	1781	2511	1648	752	955	1016
150	Olfr1262	-1.93271	1.27561e-08	470	611	488	212	112	125
151	Olfr167	-1.28963	1.40959e-08	1083	1188	778	439	421	442
152	Olfr1255	-2.26838	1.4316e-08	100	255	120	26	36	36
153	Plekhb1	-1.03632	1.85869e-08	3595	3749	2705	1492	1832	1846
154	Olfr437	-2.31093	1.94738e-08	95	238	138	25	30	41
155	Olfr1302	-2.70669	2.09237e-08	61	171	80	13	17	17
156	Olfr1258	-1.71121	2.2393e-08	298	618	276	115	145	105
157	Gm11992	-1.02044	2.36148e-08	1931	2411	1781	987	1213	991
158	Olfr1065	-2.17515	2.47702e-08	164	224	176	51	33	48
159	Sec14l5	-1.06266	2.48146e-08	1641	1166	1057	628	727	580
160	Olfr1349	-2.0356	2.87606e-08	292	655	564	134	170	82
161	Olfr569	-2.01032	2.93596e-08	207	253	178	78	57	37
162	Olfr1212	-1.67278	3.19851e-08	370	342	258	102	92	127
163	Olfr136	-1.8983	4.64867e-08	245	442	198	72	81	85
164	Olfr303	-1.94927	4.77842e-08	214	323	149	55	61	64
165	Olfr1440	-1.19828	5.71379e-08	853	1006	708	420	419	341
166	Olfr668	-2.30543	7.02762e-08	121	124	65	29	23	14
167	Olfr1246	-2.02238	7.8489e-08	250	359	176	66	55	76
168	Stxbp5l	-0.986433	7.8489e-08	3270	2951	2015	1581	1479	1276
169	Etv4	-1.36657	8.03691e-08	404	478	432	135	178	240
170	Pcdh9	-1.07196	8.05283e-08	1073	1118	838	495	553	472
171	Olfr957	-2.55112	8.32354e-08	69	124	61	9	29	11
172	Olfr716	-2.14289	8.5405e-08	119	132	105	34	31	21
173	Olfr1406	-1.88549	9.77444e-08	185	298	151	56	60	59
174	Olfr1155	-2.54787	1.01946e-07	81	125	87	19	14	19
175	Olfr1043	-2.15216	1.03883e-07	116	133	85	31	31	18
176	Kcnc4	-0.960055	1.07023e-07	6460	9310	7480	3581	5250	3881
177	Olfr1229	-1.91569	1.10619e-07	304	387	307	99	62	125
178	Olfr181	-2.83524	1.22109e-07	70	100	75	11	24	5
179	Olfr827	-1.52019	1.24135e-07	413	346	270	114	199	84
180	Olfr1392	-1.7596	1.2584e-07	226	173	216	75	69	49
181	Olfr448	-2.07156	1.34727e-07	101	158	134	27	55	22
182	Olfr881	-3.20484	1.35401e-07	65	101	64	13	5	8
183	Olfr597	-2.04665	1.35401e-07	216	184	169	43	90	27
184	Olfr430	-2.04156	1.37205e-07	132	225	159	49	47	35
185	Pcdh11x	1.19268	1.57192e-07	341	296	250	778	661	699
186	Olfr1206	-2.571	1.64417e-07	160	112	67	16	15	27
187	Olfr190	-1.28392	1.83426e-07	1173	974	813	486	322	486
188	Olfr54	-1.79319	1.92566e-07	178	184	148	56	67	36
189	Ankrd33b	-1.21811	2.06441e-07	444	603	498	209	286	212
190	Olfr670	-2.27931	2.06615e-07	122	104	90	14	37	21
191	Olfr524	-1.5557	2.06615e-07	298	163	240	97	75	75
192	Olfr142	-1.66603	2.06615e-07	240	251	178	86	70	66
193	Olfr1170	-1.66899	2.3284e-07	230	257	216	92	75	68
194	Olfr1143	-1.92839	2.41037e-07	185	178	122	28	62	48
195	Olfr675	-1.99819	2.49845e-07	183	227	138	36	45	65
196	Olfr870	-1.64842	2.67577e-07	197	303	154	75	95	50
197	Olfr1323	-2.25796	3.4172e-07	139	94	51	29	19	13
198	Carns1	-0.923925	3.4961e-07	8362	9866	7269	4298	5386	4526
199	Olfr411	-2.3948	3.51648e-07	45	151	67	9	29	15
200	Olfr1259	-1.76328	3.72661e-07	340	590	321	141	112	123
201	Olfr965	-3.09026	3.77481e-07	71	135	65	18	7	8
202	Olfr1324	-2.07098	3.83072e-07	113	122	98	18	47	24
203	Olfr1123	-1.88521	3.83072e-07	166	180	134	53	39	45
204	Olfr847	-1.71121	4.06658e-07	201	235	191	81	68	55
205	Gpr158	-1.01861	4.13681e-07	1346	1411	1146	576	721	752
206	Slc1a2	-0.913945	4.1632e-07	5253	5602	3831	2879	2864	2438
207	Olfr1045	-2.38748	4.34259e-07	75	104	68	12	27	13
208	Olfr948	-2.84316	4.44372e-07	93	103	95	28	12	7
209	Olfr849	-1.94004	4.45209e-07	182	230	125	51	42	51
210	Olfr1396	1.2067	4.78837e-07	174	301	194	446	704	480
211	Olfr1290	-2.25767	4.84714e-07	134	343	188	47	36	54
212	Slc8a1	-0.900033	4.90024e-07	5758	6903	5509	3067	3754	3492
213	Kcnn2	-1.22009	4.93674e-07	681	744	440	274	300	257
214	Olfr974	-2.36197	4.93674e-07	81	123	84	14	18	28
215	Olfr1491	-2.52744	5.23767e-07	75	96	94	18	23	9
216	Olfr502	-1.74529	5.49707e-07	181	296	124	51	74	57
217	Efr3b	-0.893896	5.49707e-07	6306	6503	4945	3284	3535	3248
218	Olfr125	-1.48189	5.54976e-07	312	332	218	132	133	69
219	Olfr392	-1.36271	5.76111e-07	452	478	297	164	170	162
220	Scn8a	-0.937126	5.98745e-07	2235	2007	1848	1002	1087	1293
221	Olfr1104	-1.89624	6.63341e-07	187	231	102	44	49	48
222	Olfr801	-1.42094	6.69588e-07	541	641	387	229	179	202
223	Cenpo	-1.05415	6.69588e-07	2358	4207	3443	1442	1862	1702
224	Olfr745	-1.57892	6.72712e-07	240	182	178	59	75	78
225	Necab1	-0.964045	6.81769e-07	1767	1930	1486	898	927	978
226	Olfr824	-2.03062	6.81769e-07	117	154	83	35	31	24
227	Olfr62	-2.73325	7.52135e-07	81	61	55	12	7	12
228	Olfr1352	-1.76901	7.58253e-07	219	330	165	81	68	65
229	Sult1d1	-1.06853	7.63015e-07	10802	15131	7905	5126	6471	5033
230	Olfr105-ps	-1.505	8.16826e-07	257	234	230	105	83	82
231	Olfr195	-2.64578	8.49843e-07	127	180	119	44	12	21
232	Olfr720	-1.66243	8.79415e-07	242	156	173	78	71	43
233	Olfr1196	-1.07079	9.13333e-07	912	576	645	437	293	339
234	Atp8b3	-1.00676	9.98205e-07	1188	1055	966	600	660	448
235	Olfr1370	1.05813	1.1242e-06	399	677	291	815	1376	762
236	Nphs1	-1.28603	1.17698e-06	295	427	476	136	184	199
237	Syn2	-0.965285	1.17698e-06	1032	998	917	517	573	511
238	Olfr596	-1.76865	1.22583e-06	198	170	164	61	38	69
239	Olfr228	-1.68564	1.24298e-06	146	218	167	56	71	48
240	Olfr959	0.949619	1.26253e-06	852	1325	863	1733	2460	1970
241	Olfr1393	-1.89595	1.29089e-06	147	119	77	32	35	28
242	Fgf12	-0.916958	1.29089e-06	5241	6258	4101	2790	3068	2784
243	Vwa3a	-0.900716	1.37792e-06	2437	2244	1876	1093	1276	1349
244	Olfr48	-1.90009	1.40493e-06	296	276	168	57	55	99
245	Olfr1477	-1.97076	1.45897e-06	172	333	186	80	61	43
246	Cnga2	-1.03191	1.56367e-06	13731	17863	11793	7069	8902	6416
247	Fam217a	-1.07625	1.61591e-06	1559	2557	2497	970	1291	1017
248	Tspan7	-0.856952	1.63027e-06	6436	8355	6938	3741	4945	4052
249	Olfr1447	-2.09107	1.6429e-06	112	130	51	24	29	17
250	Olfr786	-1.47175	1.71664e-06	470	495	317	214	128	148
251	Atp1a3	-1.41457	1.73906e-06	210	211	301	78	103	105
252	Olfr1174-ps	-2.74909	1.74644e-06	74	84	63	7	28	6
253	Ckb	-0.813151	1.75923e-06	5028	4978	4127	2218	3588	2853
254	Olfr308	-1.64589	1.77815e-06	278	548	204	92	121	110
255	Olfr141	-2.08298	1.78437e-06	96	121	70	19	28	24
256	Olfr1029	-2.01171	2.06053e-06	100	185	96	37	35	25
257	Olfr1157	-2.14157	2.43151e-06	150	272	114	60	36	29
258	Olfr912	-1.61844	2.44588e-06	294	198	224	79	120	55
259	Olfr1148	-2.23117	2.54314e-06	151	197	79	25	26	41
260	Lpcat4	-0.840271	2.66308e-06	1313	1529	1404	656	987	905
261	Olfr553	-1.38246	2.67427e-06	268	389	284	85	144	162
262	Olfr791	-1.72648	2.85273e-06	138	152	109	50	49	30
263	Gadl1	-0.847406	2.90819e-06	4546	5782	3784	2461	3106	2666
264	Brinp2	-0.86786	2.94376e-06	1665	1439	1223	710	1070	756
265	Olfr843	-1.47253	3.02678e-06	326	343	199	97	110	117
266	Olfr1242	-1.85504	3.09808e-06	141	220	139	59	48	38
267	Olfr633	-1.87042	3.18817e-06	89	120	111	23	32	39
268	Spef2	-0.840837	3.23703e-06	5370	5357	3814	2594	3056	2876
269	Gvin1	1.14055	3.23703e-06	229	309	222	551	657	558
270	Olfr116	-1.73099	3.69413e-06	254	379	162	115	78	56
271	Lrrc3b	-0.894797	3.74805e-06	1078	1672	1354	431	1151	906
272	Dnm1	-0.793868	3.79946e-06	2890	2757	2588	1428	1965	1682
273	Olfr179	-1.50824	3.9315e-06	204	162	220	77	52	92
274	Olfr835	-1.73481	4.04238e-06	223	285	138	57	64	78
275	Olfr792	-2.44157	4.26015e-06	68	96	79	7	16	29
276	Olfr2	-2.43718	4.45238e-06	87	71	52	19	16	7
277	Zbtb8b	1.23199	4.60047e-06	239	318	180	614	611	568
278	Epb41l1	-0.743483	4.66343e-06	3839	3837	3501	1975	2783	2385
279	Olfr1202	-1.88841	5.15723e-06	173	141	86	32	34	45
280	Kcnj2	-0.761622	5.43486e-06	4163	3606	3064	2071	2439	2230
281	Pde7b	-0.849728	5.44695e-06	11479	10474	6769	5408	6716	4569
282	Olfr845	-2.10499	5.44848e-06	141	194	137	54	24	40
283	Olfr594	-1.98987	5.67476e-06	83	194	90	26	33	33
284	Olfr924	-1.91729	5.67972e-06	152	205	177	49	31	75
285	Olfr46	-1.91252	5.67972e-06	98	148	98	32	30	33
286	Olfr263	-1.77076	5.67972e-06	174	229	168	70	45	62
287	Olfr1316	-1.58758	5.9113e-06	156	155	163	58	54	55
288	Olfr272	-3.34588	5.92221e-06	54	77	32	12	4	2
289	Olfr376	-1.77013	6.18558e-06	123	101	99	30	37	33
290	Olfr629	-2.34704	6.54556e-06	64	51	85	12	10	20
291	Olfr826	-2.41261	6.94052e-06	63	63	86	13	18	11
292	Olfr586	-2.56938	6.94754e-06	105	124	68	6	21	31
293	Syp	-0.81894	7.18246e-06	4364	3493	2891	1861	2321	2218
294	Olfr77	-1.35553	7.26572e-06	335	238	264	157	91	103
295	Cplx1	-1.82619	7.41794e-06	108	122	209	24	69	43
296	Olfr525	-1.42707	7.41794e-06	218	305	160	90	103	71
297	Epha5	-0.861097	7.49892e-06	2013	1756	1565	841	1198	1092
298	Olfr1034	-1.51865	7.50025e-06	269	310	226	126	83	90
299	Olfr1364	-1.57306	7.55887e-06	189	256	175	75	66	77
300	Fads2	0.819643	7.69607e-06	2465	2366	1494	3819	4183	3585
301	Olfr1510	-1.76996	7.69607e-06	133	195	141	58	52	36
302	Olfr1205	-1.47379	7.79851e-06	229	161	169	88	57	68
303	Olfr799	1.32581	8.02224e-06	104	132	96	297	323	260
304	Scn3b	-0.867654	8.40009e-06	5699	7448	6393	3523	4280	3538
305	Olfr800	1.2234	8.76558e-06	147	185	155	397	472	343
306	Dcdc2a	-0.867423	1.04778e-05	5470	5915	4172	3322	2996	2663
307	Pcp4l1	-0.845426	1.15629e-05	824	1347	1347	408	900	837
308	Olfr66	-1.98272	1.20089e-05	84	156	142	36	26	38
309	Olfr749	-2.18869	1.2233e-05	122	143	78	16	24	42
310	Olfr677	-1.75418	1.2233e-05	133	204	105	35	46	55
311	Sv2a	-0.852029	1.23579e-05	1091	1146	1194	548	786	703
312	Ric8b	-0.910031	1.33323e-05	12700	13933	8891	6132	7464	6182
313	Olfr488	-1.81382	1.33336e-05	227	382	212	98	59	84
314	Pappa	-0.839486	1.41827e-05	3445	2928	2107	1621	1666	1641
315	Rasgrp4	-1.01629	1.41827e-05	566	1121	1424	336	673	583
316	Olfr692	-1.82517	1.41827e-05	72	123	99	22	35	31
317	Hdac9	-1.05236	1.4652e-05	1853	2283	1618	1167	907	864
318	Olfr424	-2.84609	1.4652e-05	59	65	51	4	22	5
319	Olfr1414	-1.5158	1.60106e-05	225	221	163	99	62	66
320	Olfr657	-3.84176	1.63222e-05	33	38	73	3	8	0
321	Nsg1	-0.902874	1.63788e-05	6097	8486	6592	3984	4338	3608
322	Olfr919	-3.67507	1.69979e-05	23	42	49	4	1	4
323	Olfr681	-1.16868	1.72757e-05	520	652	441	201	251	311
324	Olfr582	-3.90866	1.77893e-05	32	41	37	2	7	0
325	Olfr1241	-1.50515	1.78193e-05	291	386	233	102	96	138
326	Olfr1178	-1.49999	1.82242e-05	381	379	219	154	89	119
327	Kcns3	-0.929491	1.89221e-05	1109	1683	1234	689	919	630
328	Atp10d	-0.866553	2.07054e-05	1919	2213	1477	1086	1143	995
329	Olfr145	0.848049	2.13695e-05	1184	1485	954	1877	2625	2375
330	Olfr1511	-1.74888	2.15575e-05	95	105	140	37	32	37
331	Olfr67	-1.47011	2.15943e-05	327	423	256	184	130	82
332	Snap25	-0.803384	2.15943e-05	2108	2342	1631	1254	1426	1011
333	Olfr1500	-1.88229	2.196e-05	66	127	87	19	31	30
334	Olfr1344	-2.93601	2.30551e-05	60	32	37	5	7	5
335	Olfr726	-1.31317	2.36705e-05	247	200	181	79	102	86
336	1500017E21Rik	-1.09228	2.60954e-05	342	555	341	150	251	213
337	Olfr1182	-1.25236	2.68849e-05	258	203	236	99	111	99
338	Olfr703	-2.28597	2.69784e-05	58	106	43	12	18	13
339	Clstn2	-0.759163	2.69784e-05	8354	7511	6296	4754	4694	4356
340	Olfr1297	0.956698	2.69784e-05	393	607	328	768	1127	794
341	Ttc21a	-0.802435	2.70917e-05	2365	1929	1549	1187	1157	1158
342	Slc6a11	-1.4807	2.72347e-05	105	162	234	42	72	74
343	Drd2	-0.966764	2.75845e-05	571	570	438	264	320	270
344	Rnf128	-0.89645	2.93718e-05	7002	9898	5959	3402	4795	4684
345	Olfr887	-2.28034	2.97165e-05	104	233	82	48	24	17
346	Cfap69	-0.848645	2.98725e-05	12112	11831	9310	6678	6754	6042
347	Scn5a	-0.713854	3.0465e-05	3161	3004	2725	1729	2264	1787
348	Olfr1200	-1.458	3.16521e-05	192	237	161	76	69	80
349	Olfr220	0.986157	3.37479e-05	476	626	334	1092	1116	760
350	Synj2	-0.875968	3.44899e-05	3887	4500	2856	1888	2185	2339
351	Olfr809	-1.54519	3.52676e-05	134	153	144	59	54	44
352	Olfr943	-1.93553	3.68951e-05	162	176	100	34	28	61
353	Olfr273	-1.62595	3.77981e-05	204	291	126	85	61	58
354	Plxna4	-0.817738	3.82409e-05	4962	4272	3102	2568	2241	2489
355	Olfr1354	-1.75847	3.84601e-05	153	229	111	52	42	54
356	Olfr698	-1.5778	4.0988e-05	309	317	169	94	71	110
357	Duxbl1	4.57186	4.29142e-05	0	25	0	60	101	73
358	Olfr1039	-2.20271	4.36506e-05	68	77	65	8	20	23
359	Olfr1042	-1.13945	4.46719e-05	341	407	424	177	226	164
360	Olfr155	-2.26015	5.06588e-05	56	83	39	9	23	9
361	Olfr45	-1.63686	5.28182e-05	141	106	91	30	49	36
362	Olfr1294	-1.23387	5.30631e-05	290	314	214	137	124	105
363	Gabrg2	-1.43098	5.51456e-05	109	145	156	42	60	60
364	Nap1l5	-1.5124	5.51495e-05	599	1892	2026	418	691	419
365	Stom	-1.10408	5.78647e-05	40970	37617	29881	15817	19318	18108
366	Olfr467	-1.74155	5.78647e-05	76	139	74	27	44	21
367	Ptchd1	-0.900364	5.94273e-05	1243	1987	1390	800	949	832
368	Olig1	0.904441	6.06823e-05	349	384	317	637	815	641
369	Olfr1444	-3.38394	6.06823e-05	49	60	45	13	1	4
370	Olfr1009	-1.45004	6.15468e-05	134	162	150	54	69	51
371	Slc24a2	-0.841975	6.31531e-05	9105	8373	5617	4846	4242	4312
372	Olfr1417	-1.56687	6.81323e-05	187	134	181	43	89	53
373	Nxph3	-0.965012	7.15713e-05	456	573	505	250	343	247
374	Pcolce2	-0.768814	7.38014e-05	1614	1443	1132	849	886	846
375	Olfr1490	-2.62446	7.43623e-05	63	73	51	20	6	8
376	Olfr1513	-1.42759	7.82849e-05	161	151	84	47	67	40
377	Olfr994	-2.13064	8.02457e-05	79	87	56	27	17	11
378	Olfr1256	-1.27343	8.40351e-05	371	356	282	138	118	191
379	Vmn2r33	7.31306	8.4216e-05	0	0	0	29	33	0
380	Olfr285	-1.44324	8.8923e-05	379	466	227	173	107	126
381	Pcdh10	-0.848762	8.99316e-05	1042	1154	830	610	648	516
382	Olfr11	-1.8958	9.17456e-05	158	336	158	77	44	55
383	Olfr1372-ps1	-0.710254	9.33639e-05	3080	3086	2626	1879	2005	1805
384	Elmod1	-0.856244	9.49418e-05	781	845	765	450	513	440
385	Olfr729	0.874216	9.63645e-05	510	408	412	816	774	997
386	Rgs6	-0.763219	9.71456e-05	1847	1915	1256	1026	1128	938
387	Olfr772	-1.64475	0.000100246	98	139	68	26	44	32
388	Pak3	-0.734191	0.000100931	3792	3941	2486	2116	2331	1954
389	Olfr658	-2.13578	0.000101895	47	59	83	12	18	15
390	Slc14a2	-1.0586	0.000102974	444	405	377	144	241	255
391	Olfr1002	-2.16051	0.000103565	80	85	54	13	39	8
392	Olfr357	-1.37292	0.000103565	178	211	131	75	74	61
393	Olfr297	-2.06644	0.0001058	63	172	116	29	21	33
394	Olfr671	-4.50205	0.000107537	32	20	19	0	2	1
395	Ppargc1a	-0.710717	0.000108566	3278	3514	2776	2037	2235	1912
396	Adam23	-0.725377	0.000114065	1526	1507	1417	890	1023	945
397	Nfatc2	-0.854814	0.000115118	660	998	855	367	572	543
398	Olfr1135	-2.34307	0.000125628	36	72	42	8	14	9
399	Pnmal1	-1.08703	0.000128409	318	260	292	137	149	147
400	Olfr56	1.30208	0.000129809	58	89	71	159	239	175
401	Reep1	-0.753985	0.00014264	1249	1630	1225	730	991	859
402	Olfr544	1.15165	0.00014664	122	183	108	251	377	338
403	Olfr460	-1.57275	0.000146894	133	136	74	47	38	34
404	Rprm	-1.27317	0.000152233	192	209	190	74	80	108
405	Gm10409	2.73056	0.000160492	4	7	6	35	49	38
406	Amd2	-1.05902	0.000167003	450	504	361	134	365	216
407	Olfr1090	-1.35522	0.000169551	176	314	166	95	105	66
408	Olfr985	-2.54575	0.00017733	44	36	49	9	8	6
409	Olfr851	-1.23486	0.000177811	309	268	127	113	106	82
410	Olfr1085	-1.98063	0.000182212	58	90	57	13	21	21
411	Olfr370	0.840552	0.000184221	469	581	394	840	1062	827
412	Sema3e	-0.754997	0.0001894	1581	2366	1888	1000	1391	1263
413	Olfr55	-1.03912	0.000193578	420	696	380	263	312	187
414	Olfr1161	-1.53526	0.000199334	95	105	98	32	45	33
415	Olfr1052	-2.17187	0.000199807	56	159	88	22	15	29
416	Kcnab2	-0.719173	0.000201969	1473	1397	1029	798	978	726
417	Olfr599	-1.62431	0.000201969	65	124	91	20	56	26
418	Kcna6	-0.714471	0.000201969	1384	1463	1137	767	1010	803
419	Apba1	-0.670951	0.000203868	2427	2232	1952	1350	1632	1419
420	Epb41l3	-0.666849	0.000204381	2281	2213	2215	1317	1630	1553
421	Olfr8	-1.6374	0.00021457	123	93	89	48	39	20
422	Chil4	-1.81408	0.000224592	1147	627	1594	859	168	225
423	Olfr1428	-1.67066	0.000231556	136	269	178	72	49	67
424	Vmn2r38	-3.74439	0.000235992	132	22	52	0	2	18
425	Olfr1431	-1.87329	0.000236442	73	97	48	22	32	11
426	Olfr1361	-1.30279	0.000253359	133	218	153	53	123	53
427	Kcnh3	-0.794496	0.000258852	2878	3063	1943	1299	1803	1676
428	Olfr23	-2.24801	0.00027577	49	66	41	11	11	12
429	Eml2	-0.69153	0.000281247	2328	2911	2191	1395	1923	1569
430	Olfr479	1.40987	0.000295943	46	94	47	167	220	128
431	BC049352	-0.7968	0.000302934	885	1049	834	541	665	490
432	Olfr204	0.990738	0.000320122	402	505	276	949	797	695
433	Olfr1238	-1.5222	0.000322022	279	471	221	135	89	118
434	Olfr557	1.09655	0.000328137	131	133	100	285	284	252
435	Fam179a	-0.688629	0.00032844	2670	2314	1867	1343	1705	1436
436	Olfr183	-1.21328	0.000329086	263	251	173	71	143	106
437	Sema6c	-0.7769	0.000329086	1201	1200	1253	739	842	688
438	Olfr298	-1.29802	0.000332708	236	390	171	143	143	61
439	Mapk10	-0.619853	0.000342977	3960	3967	3211	2344	2917	2426
440	Iqub	-0.770613	0.000345398	1070	1216	1046	626	719	727
441	Syt4	-0.829579	0.000345398	934	1797	1304	622	914	823
442	Tshz2	-0.659352	0.000348901	4046	3160	2584	2083	2313	2078
443	Ces1g	0.976551	0.000357978	217	358	532	544	844	833
444	Olfr267	-1.907	0.000362716	144	223	100	41	27	61
445	Olfr1356	-4.17143	0.00036783	30	39	16	0	1	4
446	Olfr138	-2.41644	0.000368731	50	83	51	17	7	12
447	Olfr317	-3.62273	0.000372275	40	19	18	2	1	3
448	Gria2	-1.31913	0.000380336	202	196	193	96	111	53
449	Psen2	-0.750931	0.000386524	887	945	1044	498	703	626
450	Nptx2	-0.816068	0.000389144	777	902	936	405	513	689
451	Olfr684	-2.3136	0.000389144	44	56	41	6	20	7
452	Olfr790	1.50605	0.00039514	63	107	31	159	218	179
453	Syngr1	-0.637388	0.000404608	5226	5786	5338	3172	4324	3731
454	Lingo1	-0.666773	0.000435667	2098	2467	2094	1347	1782	1347
455	Cacna1h	-0.623132	0.000435667	5637	4817	4102	3196	3611	3152
456	Olfr311	-2.52477	0.000441297	41	44	33	9	9	4
457	Fam131c	-0.731656	0.000447545	951	1224	1001	520	837	698
458	Cst10	-7.25769	0.000449579	5	0	57	0	0	0
459	Gramd1c	-0.819204	0.000464635	11627	14312	7989	6504	7402	5993
460	Olfr305	-1.11321	0.000470947	266	256	136	117	125	75
461	Dlgap3	-1.0623	0.000476442	399	350	298	195	244	112
462	Stmn4	-0.816672	0.000481648	1010	936	699	558	513	504
463	Cadps2	-0.636533	0.000488213	3060	3369	2735	1927	2441	1904
464	Slc17a6	-0.747858	0.000493107	3446	4858	3414	2252	2530	2525
465	Tmem117	-0.666351	0.000501457	1598	1638	1323	877	1192	989
466	Olfr1320	-2.64666	0.000508774	43	106	47	5	7	24
467	Olfr194	1.60806	0.000514841	27	39	41	134	113	100
468	Olfr1137	-2.02343	0.000550132	71	100	72	33	26	9
469	Olfr30	-1.96782	0.000557687	108	55	85	10	26	33
470	Tnfsf4	6.72836	0.000572836	0	0	0	15	14	11
471	Olfr318	-1.49692	0.000577538	169	146	134	95	44	40
472	Olfr918	-1.92312	0.000582755	83	55	61	13	17	26
473	Rarg	-0.69673	0.000584747	1310	1634	1933	848	1242	1103
474	Olfr99	-1.37331	0.000593155	176	240	96	71	70	57
475	Olfr329-ps	-1.12571	0.000601383	339	314	316	189	114	176
476	Olfr290	0.834201	0.000601601	314	354	179	496	716	381
477	Olfr1311	-1.31894	0.000620371	109	114	139	38	47	73
478	Olfr1380	-1.13219	0.000620371	164	219	221	77	102	115
479	Trim45	-0.786911	0.000620371	1270	1933	1444	843	986	992
480	Olfr95	-1.19536	0.000642271	369	378	271	203	117	155
481	Olfr1254	-1.25035	0.00065774	236	317	186	146	116	72
482	Dner	-0.705606	0.000681674	2013	2577	2216	1385	1580	1447
483	Olfr487	-1.43467	0.000694396	121	186	54	38	62	33
484	Cntnap4	-1.87994	0.000706854	83	123	83	23	17	47
485	Bpifb1	-0.901132	0.000714427	335	651	290	141	388	212
486	Synpr	-1.05683	0.000718549	298	292	380	149	202	145
487	Olfr198	-1.64072	0.000743814	104	97	65	29	25	35
488	Acox2	0.82154	0.00076356	509	658	801	957	1640	1127
489	Impdh1	-0.623856	0.00076975	3201	3186	2575	2056	2311	1802
490	Olfr556	-1.30322	0.000796114	125	162	129	56	56	66
491	Olig2	0.833426	0.000809648	325	320	243	522	623	526
492	Miat	0.717769	0.000815448	1012	671	650	1272	1414	1305
493	Olfr346	-1.0484	0.000830571	370	327	319	226	150	152
494	Olfr122	-1.71553	0.000859631	79	186	68	41	36	23
495	Olfr969	-1.05753	0.00091544	280	351	396	170	147	206
496	Olfr836	-1.98878	0.000924792	43	90	31	12	26	7
497	Maats1	-0.699301	0.000987226	1323	931	868	693	704	611
498	Olfr722	-1.083	0.000987226	206	336	205	104	143	121
499	Olfr129	0.910144	0.000987226	287	447	223	616	749	495
500	Umodl1	-0.699913	0.00100677	11758	10337	9181	5705	7746	7028
501	Nwd1	-0.59784	0.00100677	4907	3921	3424	2981	2817	2700
502	Olfr1208	-1.286	0.00100677	114	149	102	51	61	46
503	Nqo1	-0.673113	0.00101962	1320	1323	1199	786	884	887
504	Olfr725	-1.98076	0.00103138	39	63	53	8	19	16
505	Olfr133	-1.24433	0.0010376	169	258	130	82	87	72
506	Olfr70	-1.7358	0.00112412	78	59	57	20	22	19
507	Olfr704	-1.52174	0.00113457	130	87	84	47	21	45
508	Olfr1102	-1.985	0.00114347	53	77	49	12	14	22
509	Chga	-0.625587	0.00114811	2694	2616	2636	1769	1943	1756
510	Fhad1	-0.766457	0.00115774	701	595	645	351	442	420
511	Olfr44	-2.72848	0.00118936	25	37	31	2	9	5
512	Nhlh2	0.668125	0.0012196	2958	3493	2174	4397	5237	4673
513	Tmem178b	-0.825024	0.00128515	1055	601	454	550	316	355
514	Olfr743	0.70658	0.00129866	787	731	610	1160	1222	1285
515	Olfr1133	-2.96869	0.00132494	21	50	46	7	8	1
516	Olfr1110	0.819735	0.00132969	851	1372	722	2049	2229	1217
517	Olfr1134	-2.90262	0.00135781	31	52	33	1	5	14
518	Map1a	-0.607484	0.00138109	4011	5017	3362	2332	3479	2815
519	Olfr653	0.795278	0.00139228	533	857	573	1049	1304	1198
520	Mobp	-2.55163	0.00140604	42	141	88	28	12	9
521	Olfr1037	-1.92112	0.00142168	58	88	49	17	15	21
522	Olfr1309	-1.60398	0.00146323	132	158	65	38	33	46
523	Olfr1368	-2.07829	0.00146613	52	101	69	28	19	10
524	Olfr1497	-2.00472	0.00147403	54	64	46	18	11	14
525	Syt1	-0.626244	0.00165703	6617	7874	6803	4371	5343	4925
526	Olfr91	-2.34913	0.00167208	44	45	32	11	5	9
527	Ptprn	-1.06107	0.00167528	208	200	260	73	151	127
528	Olfr406-ps	-2.54517	0.00168928	49	50	39	18	3	7
529	Olfr222	-1.6985	0.00171282	75	84	42	16	37	15
530	Ttll6	-0.569743	0.00171282	3560	3983	3088	2236	2977	2401
531	Olfr111	1.2146	0.00171282	79	97	40	170	200	140
532	Nrp1	-0.624845	0.00172713	6166	6143	4813	3439	4273	4038
533	Cdkl4	-0.594261	0.00176289	6749	6367	4977	3913	5089	3724
534	Lrguk	-0.791324	0.00183663	884	636	450	431	380	357
535	Taar6	1.4008	0.00184791	33	52	31	99	115	106
536	Cartpt	0.599403	0.00184791	1915	3675	2337	2696	7512	3366
537	Olfr1448	0.804002	0.00184791	299	450	307	543	775	627
538	Oscp1	-0.652381	0.00187103	1411	1412	1101	880	931	823
539	Olfr640	-2.21175	0.00189482	36	41	53	5	18	9
540	Snph	-0.636844	0.00190957	1614	2052	1873	1045	1623	1161
541	Ndrg4	-0.592434	0.00202444	2725	2828	2755	1566	2490	1894
542	Zfp385b	-0.644586	0.00204766	1884	2346	2193	1322	1665	1377
543	Olfr97	-1.94144	0.0021001	36	71	47	10	16	16
544	Ifnlr1	-0.670157	0.0021521	1251	1161	944	624	891	730
545	Ak1	-0.59219	0.00222888	2921	2666	2483	1761	2291	1668
546	Jakmip1	-0.746835	0.00226193	858	989	876	573	576	569
547	Olfr127	-1.32215	0.00228067	116	95	82	45	39	39
548	Mmp24	-0.879519	0.00234621	347	321	301	171	218	172
549	Dusp8	-0.637605	0.00238267	1633	1604	1193	993	1047	953
550	Olfr1048	-1.62429	0.00238467	71	170	87	32	30	44
551	Zfp61	-1.14525	0.00238592	220	146	295	109	102	94
552	Olfr1051	-2.55377	0.00244413	46	36	23	11	9	1
553	Ptms	0.902616	0.0024589	1053	1220	1525	2973	2428	2131
554	Sgip1	-0.818844	0.00255062	790	1155	826	549	563	531
555	Olfr1471	-1.42064	0.00255062	196	206	110	78	45	76
556	Tmem268	-0.719992	0.00261464	1599	1454	1081	755	886	1005
557	Gm10432	-0.880365	0.00263205	959	1185	800	533	488	665
558	Cyp4v3	0.631416	0.00266695	1426	1536	1107	2062	2383	2191
559	Olfr1234	-1.25367	0.00270396	178	240	130	90	70	77
560	Klhl31	0.844249	0.00274294	327	526	225	622	815	533
561	Olfr461	-1.07075	0.00274322	178	240	135	91	111	74
562	Olfr570	-1.52798	0.00274962	111	111	77	36	25	50
563	Arxes2	-0.748759	0.00275359	617	894	892	376	702	469
564	Olfr417	-0.988613	0.00277514	294	260	217	135	123	152
565	Olfr655	-1.0741	0.00282343	235	289	218	147	121	106
566	Rpl31	0.571453	0.00285085	2159	2712	2703	3155	4184	4696
567	Sv2c	-0.698363	0.00285744	1011	607	590	552	431	425
568	Olfr728	-0.767352	0.00286385	818	606	493	436	354	383
569	Olfr1056	1.08512	0.0029051	70	136	97	194	268	208
570	Olfr516	-2.14425	0.00301974	42	90	25	8	13	13
571	Olfr818	-1.70718	0.00302406	67	80	32	22	26	10
572	Olfr571	0.732922	0.00304113	452	685	454	857	1226	735
573	Olfr1509	0.830388	0.00304919	377	273	198	508	516	527
574	Pex5l	-0.612681	0.00326753	2966	3304	2686	2071	2160	1964
575	Olfr718-ps1	-1.06917	0.00326994	356	490	368	270	192	160
576	Epha7	-0.805632	0.00327375	1037	1969	1711	829	985	964
577	Olfr1384	-1.2285	0.00327545	195	273	181	115	78	98
578	Ccdc184	-0.63962	0.00329348	1087	1424	1054	617	1046	798
579	Olfr478	-1.97948	0.00335167	39	142	95	23	15	29
580	Olfr1160	-1.1254	0.00344995	280	298	244	195	122	97
581	Olfr239	-0.778248	0.0035259	454	430	377	257	307	220
582	Olfr736	-1.68214	0.00363777	71	61	44	25	19	14
583	Olfr742	-1.17085	0.00365791	157	167	136	86	66	65
584	Olfr464	-1.27802	0.0036774	113	100	75	46	49	31
585	Mtss1l	-0.575434	0.00377115	2538	2357	2132	1496	1894	1623
586	Myo5a	-0.570856	0.00377115	5628	5220	4079	3696	3694	3195
587	Alad	0.651633	0.00383187	1253	1859	2128	2236	3515	2925
588	Omp	-0.914142	0.00385383	45075	44246	44791	19787	28723	28022
589	Olfr646	-1.74042	0.00416323	64	63	46	11	31	16
590	Gfy	-0.539577	0.00423059	4476	5011	4972	2828	4077	3758
591	Olfr410	-1.03536	0.00427189	211	227	243	113	158	89
592	Mb21d2	-0.600214	0.00429136	1550	1689	1234	1031	1189	903
593	Rgs7	-0.970272	0.00430195	209	293	233	94	143	168
594	Olfr466	-1.04992	0.00433899	328	280	242	205	104	137
595	Coro6	-1.30431	0.00436295	116	116	85	28	60	52
596	Olfr1424	-2.48908	0.00436295	76	39	36	6	27	3
597	Olfr350	-2.12356	0.00459255	49	63	55	18	5	20
598	B230216N24Rik	-0.957569	0.00460358	203	367	197	112	176	123
599	Igsf8	-0.568012	0.00469466	1671	1542	1564	1014	1272	1144
600	Olfr1031	-1.31231	0.004695	80	99	122	43	40	44
601	Olfr558	0.863152	0.00473997	183	340	247	433	623	415
602	Olfr630	-1.61436	0.00474632	81	87	54	23	21	32
603	Olfr606	-3.36044	0.00488349	25	28	11	1	2	3
604	Olfr178	-1.75994	0.0048841	49	77	52	7	27	27
605	Gnal	-0.911759	0.00498324	53693	51938	32625	26060	29253	21383
606	Hcn2	-0.626217	0.00498324	2412	2722	1682	1466	1710	1431
607	Olfr3	-2.54962	0.00504218	16	59	49	8	10	3
608	Thsd7b	0.660459	0.00521786	1063	967	640	1445	1466	1469
609	Pygo1	-0.93055	0.00523065	270	373	219	167	190	120
610	Olfr96	-2.29593	0.00525669	47	78	26	19	6	7
611	Hbb-bs	0.855239	0.00525669	8577	10844	8744	21232	19760	13756
612	Fam163b	-3.10696	0.00532232	23	16	21	3	2	2
613	Amigo1	-0.693358	0.00547889	1155	1416	1163	705	794	958
614	D130043K22Rik	-0.551676	0.00548187	3128	2430	2114	1837	2032	1631
615	Crabp2	0.926641	0.00560042	169	167	100	250	340	276
616	Olfr65	0.740862	0.00563669	244	312	316	422	544	586
617	Smr3a	-6.64749	0.00566371	0	5	35	0	0	0
618	Elovl4	-0.603687	0.00571943	1387	1594	1269	922	1062	975
619	Luzp4	6.48911	0.0057195	0	0	0	13	24	0
620	Hn1	0.559191	0.00577117	1417	1558	1384	2070	2589	2177
621	9330182L06Rik	-0.684885	0.00577117	953	957	871	657	586	592
622	Slc12a5	-0.889143	0.00578917	278	248	253	129	182	139
623	Olfr199	-1.30592	0.00598727	96	130	75	49	43	35
624	Olfr1494	-2.11764	0.00606158	40	83	38	21	17	4
625	Ltk	-0.617355	0.00606471	2247	2029	1159	1093	1581	1013
626	Isyna1	0.689844	0.00611641	503	487	376	738	800	783
627	Olfr992	-2.73999	0.00640596	28	53	35	6	1	13
628	Olfr168	0.791976	0.00642232	259	233	214	398	394	510
629	Galnt15	-1.05294	0.00670645	260	297	227	183	123	103
630	Macrod1	-0.663204	0.00697537	870	970	757	507	841	448
631	Olfr170	-1.08784	0.00697537	137	130	104	70	69	47
632	Olfr447	1.14546	0.00703543	52	84	38	115	159	122
633	Cntn4	-0.701085	0.00714193	14873	16694	11860	8507	10164	9455
634	Olfr1330	-1.01165	0.00714193	244	240	186	161	114	85
635	Olfr608	-2.74925	0.00715342	23	40	30	9	3	3
636	Flrt1	-0.586596	0.00718252	8137	6028	4106	4917	4055	3560
637	Olfr1112	-1.61098	0.00724842	119	303	125	83	45	49
638	Shank2	-0.623552	0.00734698	1154	761	988	713	574	691
639	Olfr1209	0.794709	0.00758378	219	289	217	380	456	496
640	Slc4a4	-0.595994	0.00774431	5353	6444	4812	3764	4094	3721
641	Olfr976	-1.58536	0.00774991	50	73	55	10	35	23
642	Olfr938	-2.926	0.00779724	14	36	15	1	7	2
643	Nlgn3	-0.636976	0.0079754	840	675	722	469	545	508
644	Nfe2l2	-0.621508	0.00808844	8976	10030	7953	5299	6494	6817
645	Olfr314	-1.22922	0.00824491	194	165	142	114	44	79
646	Olfr794	0.697989	0.0082944	488	802	415	824	1171	863
647	Kif9	-0.560124	0.00835391	2879	2433	1711	1602	1932	1443
648	Olfr1152	-2.54012	0.0083556	37	38	10	3	9	3
649	Olfr1339	-1.47128	0.0083556	64	119	72	38	35	23
650	1110008F13Rik	0.605263	0.00842547	609	740	595	807	1346	1037
651	Mlxipl	0.92937	0.00845549	86	120	122	177	241	246
652	Olfr744	-1.56755	0.00853583	108	85	61	29	18	46
653	Atp6v1g3	2.19147	0.00864895	5	14	7	33	34	58
654	Olfr1395	0.813769	0.00879253	235	439	231	462	649	521
655	Kcnmb3	-2.22327	0.00896315	38	35	29	5	6	13
656	Olfr768	-1.29001	0.00901974	120	70	73	32	42	37
657	Ormdl3	-0.538803	0.00904736	2746	3100	2683	1876	2625	1804
658	Olfr1087	-1.18017	0.00919814	101	134	89	55	56	40
659	Cep126	-0.541196	0.00920073	2468	2015	1638	1492	1569	1348
660	Ptprr	-0.708342	0.00927866	1193	1398	799	631	771	752
661	Olfr319	-1.64064	0.00941829	45	85	32	17	28	10
662	Olfr338	-6.08362	0.00941829	7	9	8	0	0	0
663	Olfr419	-1.24228	0.00949974	173	180	143	125	66	47
664	Olfr1261	-0.846812	0.00952805	405	589	501	313	304	259
665	Olfr330	-1.4887	0.0102781	67	94	103	44	27	29
666	Pirt	-0.927306	0.0103262	274	285	188	126	137	148
667	Lyg2	2.16549	0.0108782	7	11	3	28	55	18
668	Tmem136	-0.769618	0.0109222	508	681	515	339	353	359
669	Olfr215	-1.19686	0.010928	83	151	77	39	57	44
670	Olfr1484	-0.931596	0.010928	195	188	166	102	120	85
671	Olfr457	-1.21369	0.010928	116	120	100	72	51	35
672	Olfr348	-2.32836	0.010928	39	45	29	8	3	14
673	Olfr1508	0.646392	0.010928	1310	741	723	1578	1177	1734
674	Gng8	1.31597	0.0109609	40	20	39	91	80	82
675	Cahm	0.675139	0.0110471	916	753	403	1170	1197	974
676	Cdca5	0.908247	0.0110689	148	250	143	357	396	299
677	Tspyl4	-0.548467	0.0111111	5986	7315	5555	4028	5330	4322
678	Olfr1341	-1.08422	0.0113188	162	193	110	74	75	78
679	Adcyap1r1	-1.07098	0.0113781	110	184	113	55	81	67
680	Olfr869	-3.30148	0.0113781	11	28	21	2	5	0
681	Olfr316	-1.79645	0.0113781	60	110	67	29	12	31
682	Olfr1221	-0.868331	0.0113941	314	223	236	181	154	115
683	Olfr1171-ps1	-1.90631	0.0114996	42	80	42	24	17	7
684	Ndfip1	-0.54444	0.0115243	1675	1682	1773	983	1363	1433
685	Olfr462	-1.24141	0.0117071	90	96	66	40	44	29
686	Ndrg3	-0.555801	0.0117387	6275	8689	7013	4517	6657	4779
687	Fam189a1	0.818598	0.0118299	208	194	153	392	326	316
688	Eml6	-0.571639	0.0119597	2977	3235	2530	2201	2113	1904
689	Klkb1	0.585226	0.0120371	1390	1887	1889	2113	2654	3559
690	Olfr206	-1.22644	0.0120548	89	99	66	35	56	27
691	Elmod3	-0.519265	0.0124124	2135	2194	1850	1375	1790	1427
692	Olfr1079	1.009	0.012529	136	199	103	197	350	401
693	Pcdha9	-0.648133	0.0127771	734	588	650	374	473	491
694	Olfr967	-2.59322	0.0128778	29	29	20	8	2	4
695	Olfr623	-1.7094	0.0129243	64	33	38	23	10	11
696	Nol4	-0.624237	0.0134229	1998	2746	1721	1590	1721	1126
697	Atcay	-0.680637	0.0139645	567	595	486	352	396	341
698	Eno2	-0.68302	0.0141661	408	423	503	241	317	328
699	Olfr748	0.91794	0.0141661	96	127	92	180	228	222
700	Slc4a8	-0.517	0.0141892	6297	4875	4086	3608	3912	3620
701	Olfr1386	0.812052	0.0141892	146	178	129	239	379	239
702	Olfr106-ps	-1.17819	0.0143642	100	113	87	53	43	44
703	Eml5	-0.523807	0.0144182	4465	5749	4071	3116	4074	3306
704	Olfr112	-1.22509	0.0146017	124	162	107	75	44	59
705	Abca2	-0.50294	0.014724	2768	2667	2418	1734	2242	1925
706	Mybl1	0.608879	0.0147443	1081	927	712	1482	1317	1549
707	Olfr339	0.809041	0.0148072	242	284	156	393	427	415
708	Cxcr4	0.639986	0.0148072	619	598	413	941	914	804
709	Prpf4	-0.514663	0.0148476	1958	2415	1962	1327	1892	1513
710	Ypel4	-1.4664	0.0152802	52	67	74	24	30	20
711	Olfr1197	0.697256	0.0155871	2853	4952	3231	5839	6385	6220
712	Slc45a1	-0.688353	0.0158014	429	445	416	213	353	300
713	Srcin1	-0.546678	0.015923	3048	2627	2145	1825	1836	1963
714	Olfr766	-1.4058	0.0159435	57	59	78	18	34	27
715	Olfr699	-1.00826	0.0159435	145	172	98	59	94	65
716	Ranbp3	0.567794	0.0160047	1277	1490	1799	1958	2826	2406
717	Ttc9	-0.486519	0.0160047	3935	4283	2924	2764	3352	2308
718	Fabp4	5.92355	0.0160448	0	0	0	5	12	7
719	Olfr1233	-1.3996	0.0160761	76	108	54	26	30	37
720	Igsf9	0.599443	0.0160761	627	586	504	828	979	949
721	Olfr463	-1.95872	0.0161252	48	63	41	12	7	25
722	Tmem64	-0.683233	0.0161342	16691	18806	13364	9423	11580	11078
723	Olfr1303	0.819531	0.0161342	136	150	136	242	290	260
724	Armc2	-0.586093	0.0161342	3336	3024	2245	1821	1986	2212
725	Hbb-bt	0.724814	0.0161746	3314	5594	3190	7815	8439	4860
726	Olfr916	-1.85736	0.0161746	91	11	66	14	10	15
727	Cep83	-0.538545	0.0165429	1724	1944	1809	1230	1512	1270
728	Olfr981	-1.06777	0.0167753	172	248	161	92	81	118
729	Olfr1446	-1.1277	0.0167753	76	113	94	36	64	40
730	Shprh	0.54759	0.0169384	2048	1786	1491	3036	2540	2633
731	Zfand2a	-0.512647	0.0170873	2418	2156	1443	1555	1680	1184
732	Olfr727	0.584811	0.0170873	905	909	829	1368	1272	1576
733	Slc6a17	-0.537272	0.0170873	1634	2244	1998	1187	1755	1375
734	Olfr13	-1.66011	0.0173951	50	90	34	25	19	12
735	Olfr131	0.915345	0.0174528	117	108	64	177	299	121
736	Olfr1057	1.14505	0.0174528	56	93	57	190	156	132
737	Golga7b	-0.542047	0.0174528	1233	1356	1213	781	998	1006
738	Astn1	-0.581162	0.0174528	1248	1255	1072	767	861	906
739	Nmnat2	-0.571595	0.0175045	1178	1165	1090	792	855	803
740	St6galnac6	-0.651994	0.0176215	668	552	435	371	417	319
741	Gm15080	6.21948	0.0179531	0	0	0	5	0	28
742	Spock2	-0.497834	0.0182787	4306	4357	3328	2690	3293	2988
743	Olfr1184	-1.01751	0.0182853	94	139	118	50	70	64
744	Sorl1	-0.493873	0.0184407	4885	2895	3326	3013	2206	3022
745	Olfr986	-2.1961	0.0185538	29	42	19	9	6	5
746	Olfr169	0.698528	0.0186331	306	248	207	450	410	435
747	Glo1	-0.49695	0.0190413	2397	2870	2460	1596	2279	1976
748	Olfr1107	1.00206	0.0190413	106	145	63	226	217	194
749	Kif18b	1.24278	0.0191414	28	44	33	85	96	81
750	Hrasls	-0.635326	0.0192712	633	726	577	424	507	393
751	Nacad	-0.681656	0.0192712	624	614	470	359	377	385
752	Pcdha7	-0.955385	0.0192995	328	236	159	134	104	145
753	Olfm4	1.14539	0.0193549	87	113	202	175	145	966
754	C630031E19Rik	2.26341	0.019432	7	2	10	59	9	33
755	Gm20257	1.63573	0.019851	13	13	15	38	58	42
756	Cacnb2	-0.550511	0.0201146	1343	1311	1008	875	973	792
757	Tollip	-0.514923	0.0203573	4024	4838	3447	2784	3333	2958
758	Olfr517	-3.64509	0.0205258	9	26	15	1	0	3
759	Rab37	-1.39453	0.0207495	116	66	68	21	53	29
760	Olfm1	-0.593645	0.0207679	1632	2420	2368	1316	1757	1409
761	Ttll3	-0.617907	0.0208255	1192	1144	846	663	729	789
762	Gm11837	-0.996074	0.0215463	133	138	137	69	64	85
763	Olfr119	0.995796	0.0218756	66	78	52	141	156	116
764	Olfr135	-1.63107	0.022227	56	49	46	24	10	19
765	Cacna1a	-0.776286	0.0224786	373	236	223	178	161	163
766	Olfr1195	0.636097	0.0225912	739	698	556	1147	961	1164
767	Olfr1193	0.817868	0.0230267	302	384	241	563	504	644
768	Iqce	-0.552054	0.0230267	1691	1239	1258	855	1221	955
769	Olfr434	-3.64989	0.0230267	18	19	10	0	1	3
770	Olfr150	-1.66576	0.0235656	44	56	30	10	17	16
771	Olfr173	0.878993	0.0235656	107	112	95	209	264	152
772	Olfr1215	-1.16596	0.0239475	73	133	73	39	49	40
773	Olfr1098	-1.12434	0.0239946	126	70	114	39	57	52
774	Lrriq1	-0.556477	0.0239946	1683	1459	1086	1195	951	879
775	Zfp429	1.0916	0.0244025	68	29	106	148	109	160
776	Olfr177	-1.3902	0.0244025	69	83	70	43	27	22
777	Fam13a	-0.504457	0.0244025	2201	1893	1428	1441	1506	1146
778	Olfr449	0.627428	0.0244025	469	548	312	652	856	636
779	Olfr922	-3.67889	0.024856	10	19	21	3	0	1
780	Chst8	-0.803983	0.0248897	182	291	243	83	190	181
781	Olfr286	0.72703	0.0249035	653	436	371	933	608	1008
782	Taar7f	1.55178	0.0249321	20	20	10	63	52	38
783	Pcdha12	-0.836038	0.025019	213	311	264	135	156	175
784	Olfr807	-1.7918	0.0250878	48	32	44	11	20	8
785	Olfr970	0.985414	0.0254203	94	58	43	148	121	124
786	Arhgef28	-0.459179	0.0257175	3843	3723	3354	2536	3031	2867
787	Inpp5f	-0.49381	0.0265242	2924	3276	2767	1969	2399	2398
788	Olfr279	-0.764026	0.0266142	306	327	273	200	199	167
789	A830018L16Rik	-0.544753	0.02662	1857	2036	1260	1380	1416	937
790	Kif13a	-0.530832	0.026864	2156	1748	1420	1150	1426	1292
791	Kcna5	-0.66887	0.0270571	395	367	324	232	273	220
792	Ccnb1	0.705803	0.0272567	388	711	357	767	943	710
793	Snap91	-0.519334	0.0272567	2937	3217	2387	1942	2183	2156
794	Hcn1	-0.562409	0.0272567	1165	1318	890	785	902	716
795	Baz1a	0.484086	0.0278112	2191	1803	1576	2710	2806	2674
796	Olfr1410	-1.102	0.0281767	168	222	89	56	86	85
797	Bcl2	-0.558982	0.0281767	1645	1999	1526	1259	1335	1115
798	Gm9839	5.8292	0.0288072	0	0	0	2	20	4
799	Fads6	-1.1341	0.0289133	265	128	114	57	119	63
800	Ide	-0.591857	0.0289133	9303	6734	8311	4123	6800	6463
801	Tnfsfm13	-2.94536	0.0289794	9	83	0	0	17	0
802	Olfr373	-3.04933	0.0289794	22	20	16	3	0	5
803	Olfr361	-1.01418	0.0292891	154	106	72	71	50	48
804	Abca3	-0.450365	0.029977	3577	3065	3010	2320	2690	2473
805	Dclk3	-0.677897	0.0301134	390	523	531	288	326	338
806	Olfr1115	-1.54035	0.0302878	51	71	38	24	17	16
807	Wbscr17	-0.543976	0.0305435	991	1036	1007	672	804	737
808	5730403I07Rik	-0.626459	0.0305435	885	1977	1061	711	1119	762
809	Anks1b	-0.781949	0.0310344	710	1080	674	527	446	513
810	Olfr101	0.754583	0.0313294	200	301	165	331	435	400
811	Olfr686	-1.33172	0.0315164	109	159	66	78	35	30
812	Olfr1198	-0.913131	0.0316699	174	157	133	102	82	77
813	Wdr17	-0.524447	0.0326781	1641	1343	1159	1065	933	1030
814	Olfr397	-1.29718	0.0327112	129	209	99	90	43	53
815	Olfr715	0.719799	0.0327841	196	256	157	323	429	305
816	Olfr1270	-1.08255	0.0330273	164	230	74	63	84	69
817	Olfr605	-1.81104	0.0331467	19	45	40	6	19	8
818	Inpp4a	-0.476592	0.0333874	4490	5371	4878	3299	4512	3501
819	Ccdc40	-0.520412	0.0333874	1295	1230	1212	922	1034	818
820	Mapk8ip2	-0.467988	0.0338626	4050	3395	2635	2378	2815	2442
821	Tmem94	-0.448178	0.0338626	3927	3368	3105	2418	2950	2705
822	Olfr1106	-1.48744	0.0345665	50	96	47	29	22	19
823	Stap1	0.544757	0.0347352	682	652	539	797	1174	949
824	Olfr201	-0.936529	0.0349133	234	231	137	71	217	79
825	Olfr351	1.10822	0.0353034	72	135	56	192	172	201
826	Syn1	-0.694221	0.0354054	313	458	497	232	314	278
827	Speer4e	3.7427	0.0354768	0	0	4	11	5	28
828	Olfr796	-1.27913	0.0356329	112	115	89	68	73	16
829	Hsbp1l1	1.06034	0.0360759	40	58	34	89	122	80
830	Pde4d	-0.493803	0.0361612	1829	1499	1446	1212	1418	984
831	Eif3j2	2.19339	0.0367837	0	353	0	11	472	26
832	B4galnt3	-0.522632	0.0368213	3530	2056	2279	1724	1991	1939
833	Socs2	0.500972	0.0373153	4801	6691	4617	6595	9707	7836
834	Mapk4	-0.482245	0.0382502	1567	1374	1390	970	1152	1172
835	Arxes1	-0.847347	0.0385178	444	459	283	201	199	296
836	Bsn	-0.515455	0.0391378	2158	2030	1975	1678	1445	1457
837	Mir124a-1hg	-1.38979	0.0395494	38	53	71	18	19	28
838	Apol7b	6.48428	0.0397588	0	0	0	37	0	0
839	Mex3a	0.504655	0.0397588	1205	912	736	1368	1471	1373
840	Gria1	-0.817104	0.0399921	158	159	206	80	111	127
841	Hivep2	-0.481179	0.0403108	2165	2639	2194	1545	2084	1709
842	Olfr123	-1.67198	0.0406624	65	126	52	31	13	33
843	Agtpbp1	-0.487274	0.0410541	5235	4648	3421	3282	3338	3293
844	Olfr933	-1.68468	0.0419296	35	44	56	13	26	8
845	Endod1	-0.521791	0.0419592	11755	10934	8138	7145	8393	7033
846	Cdca3	0.62678	0.0419659	320	415	231	481	654	431
847	Vmn2r47	-6.35502	0.0419963	0	0	37	0	0	0
848	Sp140	1.26178	0.0420346	143	872	157	554	814	682
849	Tmem192	0.872304	0.0430239	60	91	93	108	202	172
850	Lrig3	0.527967	0.0430239	945	867	607	1157	1375	1121
851	Lrp11	-0.523613	0.0433489	1095	1367	1070	759	1002	847
852	Jakmip3	-0.941435	0.0435847	124	104	141	70	48	89
853	Kcnb1	-0.494827	0.0437777	3541	2530	2060	1998	1968	2004
854	Xlr3c	2.30335	0.04385	6	0	15	26	15	42
855	Nova1	-0.633059	0.0445686	400	653	399	273	406	303
856	Olfr1121	-2.08026	0.0445686	27	25	28	3	6	13
857	Hdac3	0.440055	0.0446636	3073	3287	3399	3559	5196	5530
858	Pcdha3	-0.656237	0.0450909	827	601	551	355	439	535
859	Olfr18	-1.27539	0.0450909	93	70	62	54	37	15
860	Olfr365	0.575449	0.0458314	900	938	677	1496	1226	1229
861	Rffl	-0.468204	0.0460821	2550	2551	1997	1555	2158	1745
862	Ocrl	-0.455638	0.046285	2928	2890	2532	1947	2281	2232
863	Magi1	-0.469106	0.0465168	1996	1720	1536	1276	1457	1276
864	Olfr275	-5.54397	0.0465168	7	4	6	0	0	0
865	Olfr325	-1.57643	0.0470337	35	27	56	8	10	27
866	Olfr1191-ps1	0.598649	0.0470676	778	897	605	1298	1177	1145
867	Olfr765	-1.43733	0.0470676	53	58	33	14	24	18
868	Fam184a	-0.730661	0.0472419	313	202	214	167	139	152
869	Mlc1	-1.43469	0.0473063	35	127	113	33	35	29
870	Gprc5c	-0.494494	0.0474763	2434	3050	2254	1782	2112	1898
871	Npcd	-0.476771	0.047553	2130	2050	1698	1414	1550	1498
872	Lhfpl4	-0.540215	0.0479751	1146	1076	736	696	766	662
873	Galnt14	-0.53334	0.0479939	1286	953	852	731	726	775
874	Gabbr1	-0.441109	0.0484484	5247	4968	4339	3561	4102	3692
875	Klhl5	-0.551819	0.0488444	4855	6855	4915	3936	4209	3741
876	Olfr820	-0.601326	0.0488444	594	1006	531	407	615	436
877	Casr	0.708175	0.0493	258	195	140	345	334	321
878	Olfr894	-2.20627	0.0493	32	23	12	8	4	3
879	Adam28	-0.47245	0.0494014	5298	6128	4656	3586	4527	4160
880	Ttll7	-0.662617	0.0499702	21870	25700	15644	13964	14775	12804
881	Ak8	-0.975209	0.0500387	103	126	92	54	57	61
882	Olfr203	1.08834	0.0510069	40	39	32	90	84	76
883	Olfr291	0.567429	0.0512639	618	690	479	1052	1099	685
884	Mtcl1	-0.458624	0.0513379	3247	3859	3103	2433	2852	2577
885	Zbbx	-0.797207	0.0514186	367	130	143	149	101	105
886	Jchain	1.07405	0.0523692	39	93	21	74	163	78
887	Mthfsl	3.86197	0.0524013	0	3	0	16	17	6
888	Olfr354	-0.718866	0.0524013	405	366	267	260	197	206
889	Olfr1308	-1.52704	0.05246	38	41	45	13	11	23
890	Vmn1r132	3.07522	0.0527685	6	1	0	23	16	8
891	Gm3500	-1.63115	0.0527952	75	65	40	54	11	11
892	Glb1l2	-0.501464	0.0527952	9866	9640	8056	6564	7210	6808
893	Olfr432	0.814021	0.0538011	120	139	85	214	216	201
894	Npm2	5.52009	0.0538873	0	0	0	4	9	5
895	Dnah11	-0.466704	0.0540038	3268	2403	2044	2256	1789	1797
896	Olfr362	-1.15936	0.0540038	78	111	73	55	43	28
897	Rab26	0.910795	0.054082	53	56	81	105	142	130
898	Pawr	0.582851	0.054229	371	324	269	453	602	476
899	Slc24a4	-0.738479	0.0549526	335	284	213	165	171	185
900	4833428L15Rik	-2.2953	0.0554802	36	5	29	8	0	8
901	Crabp1	0.974564	0.055496	74	35	45	109	88	112
902	Cebpa	0.630407	0.0555715	307	312	314	560	507	469
903	Abcb4	1.01657	0.0561997	71	126	85	260	224	132
904	Pcdh8	0.646843	0.0564319	449	361	477	615	948	608
905	Olfr403	0.849002	0.0564433	76	74	89	128	168	163
906	Pcsk1	-1.60482	0.0566215	34	86	33	8	19	26
907	Casz1	-0.478468	0.0566362	1569	1403	1180	952	1110	1085
908	Olfr399	-1.90325	0.0567781	24	28	31	5	6	14
909	Gng3	0.841907	0.0571081	64	89	106	125	171	197
910	Rsad2	0.571622	0.0574256	527	697	465	902	1146	647
911	Kcnh4	-0.471472	0.0574758	4160	4162	3325	2427	3180	3341
912	Olfr644	0.794462	0.0578803	124	141	98	173	240	259
913	Cenpf	0.566422	0.0584749	705	721	514	1098	981	940
914	Il9r	-5.44416	0.0589619	10	3	4	0	0	0
915	Inpp5k	-0.458722	0.0591364	1904	2006	1831	1370	1631	1439
916	Wdr63	-0.540407	0.0591911	604	904	591	384	678	482
917	Olfr1487	-1.46133	0.059243	36	101	24	15	26	14
918	Syn3	-0.693721	0.0595751	405	401	261	242	225	220
919	Ccdc108	-0.442634	0.0595827	2807	2619	2620	1671	2492	2197
920	Olfr20	0.931727	0.0598169	62	99	94	175	189	148
921	Olfr1100	-0.918982	0.0598199	102	169	84	56	79	59
922	Socs5	-0.514013	0.0598199	1442	1998	1457	1078	1337	1195
923	Pcnx4	-0.514484	0.059996	1202	1071	827	674	863	750
924	Olfr360	-1.56042	0.0603083	66	33	37	22	6	23
925	Clec16a	-0.456628	0.0607382	2714	2280	1954	1658	1919	1755
926	Brap	0.4759	0.0608097	3701	5418	4367	5412	8275	6281
927	Tmod2	-0.46836	0.0608885	4595	3796	2872	2989	2684	2814
928	Armc3	-0.598118	0.0608885	573	655	415	348	439	352
929	Olfr988	-1.37808	0.0617159	44	53	43	12	26	21
930	Olfr476	-1.5966	0.0619308	37	69	37	14	12	23
931	Agpat9	-0.541039	0.0625168	708	828	694	506	594	525
932	Kntc1	0.66078	0.0626897	252	294	154	416	426	306
933	Cd300ld3	2.27268	0.0629574	2	4	6	5	20	52
934	Olfr353	1.45889	0.0629574	11	26	22	59	68	43
935	Olfr825	-0.945864	0.0629574	192	181	192	158	75	92
936	Nap1l2	-0.723205	0.0634118	267	419	250	196	238	160
937	Etv5	-0.482256	0.0640601	1282	1811	1552	985	1322	1214
938	Olfr1342	-0.737831	0.06442	262	291	175	111	220	140
939	Olfr418-ps1	1.08055	0.06442	55	44	30	97	75	115
940	Stk38l	-0.474913	0.0645498	3191	3591	2398	2081	2525	2326
941	Olfr577	0.802996	0.0648062	107	155	101	214	228	220
942	4931408D14Rik	-1.66587	0.0652469	81	39	52	6	28	27
943	Lingo2	-0.573807	0.0652469	1761	2170	1480	1381	1201	1231
944	Mup7	2.87934	0.0660288	2	6	0	5	30	33
945	Vav2	-0.447031	0.0661273	1628	1521	1384	1058	1264	1207
946	Ccdc157	-0.441536	0.0661273	4341	4640	3359	2956	3515	3103
947	Syngap1	-0.57169	0.0673253	640	511	546	444	391	373
948	Olfr453	-1.69229	0.0683734	38	48	18	13	10	9
949	Olfr1321	-1.3164	0.068478	65	102	95	36	18	66
950	Olfr1338	-3.70629	0.0684977	15	3	16	1	1	0
951	Dtl	0.650744	0.0687203	355	408	186	615	559	364
952	Olfr1026	-2.27358	0.0694751	21	27	22	4	2	11
953	Olfr312	-1.93578	0.0698356	52	59	29	24	3	15
954	Dync1i1	-0.889455	0.0700863	100	113	120	48	61	86
955	Olfr38	-2.478	0.0700863	31	18	11	5	1	5
956	Cnpy3	0.456101	0.0701684	1168	1097	1712	1372	2019	2441
957	Gm6793	1.86045	0.0704248	1323	58	939	1349	1913	2360
958	Rtn1	-0.442201	0.0704373	3652	3851	2988	2706	2827	2613
959	Mcm3	0.614935	0.0706182	231	277	191	308	458	373
960	Olfr676	-1.26148	0.0706182	70	44	45	24	26	19
961	Slc1a5	0.484127	0.0706382	860	884	693	1021	1476	1142
962	Fbxo10	-0.457313	0.0707009	1389	1700	1411	1044	1375	1071
963	Enho	1.03584	0.0708574	34	41	36	63	97	85
964	Olfr815	-1.47198	0.0708669	29	56	58	17	15	21
965	Aatk	-0.523275	0.0709498	747	984	908	548	697	704
966	Olfr130	-0.671787	0.0714417	263	369	209	166	258	140
967	Olfr307	-1.20026	0.0715456	76	156	63	42	37	47
968	Tmem176b	0.450756	0.0718174	5132	5616	6361	6704	9182	9074
969	Olfr47	-2.25439	0.0718311	26	24	19	2	14	3
970	Tcte1	-0.604661	0.0719786	1098	1124	784	582	674	839
971	Zfp523	-0.558115	0.0721569	587	570	485	347	460	380
972	Pam16	5.4288	0.0723292	0	0	0	7	5	4
973	Cotl1	0.583821	0.0723292	338	366	298	498	560	532
974	Gmppb	0.546902	0.0725664	1123	796	1192	1123	1964	1801
975	Cadps	-0.434551	0.0725664	2368	2049	1899	1618	1666	1652
976	Tmem181b-ps	-0.436289	0.0730155	3815	5590	3603	2981	4570	2718
977	Rnf144a	0.596267	0.0733012	2206	1646	1528	4577	2073	2409
978	Arrdc1	0.562787	0.0739557	436	556	584	749	884	826
979	Slc2a1	0.454721	0.0740874	4508	4148	3915	5167	6251	6963
980	Olfr1239	1.12632	0.0740874	36	68	27	91	96	99
981	Hspa12a	-0.571782	0.0740874	668	637	520	417	420	459
982	Zbtb7b	-0.434881	0.0740874	4324	3135	2586	2451	2834	2439
983	Olfr497	-4.29264	0.0740874	11	10	3	1	0	0
984	Olfr39	-1.88435	0.0741802	24	43	33	15	7	7
985	Olfr828	-1.61032	0.0743374	44	31	29	9	19	9
986	Slit1	-0.513754	0.0749818	939	784	687	635	611	534
987	Tmem200a	0.83701	0.0749818	135	136	75	205	203	230
988	Gpc2	0.545825	0.0749826	422	415	392	597	654	653
989	Cmtm7	0.530275	0.0755506	417	460	475	520	874	720
990	Olfr566	-1.0755	0.0755506	148	313	211	104	73	157
991	1700001L19Rik	-0.529333	0.0755506	678	764	623	421	568	536
992	Mycbp2	-0.46029	0.0755593	9182	7669	6588	6451	5834	5646
993	Col9a3	0.862183	0.075605	283	688	509	857	1643	501
994	Exoc6b	-0.442901	0.0756922	3874	3062	2278	2432	2394	2207
995	Olfr218	0.870348	0.0758476	66	78	65	139	157	112
996	Prune2	-0.449357	0.0758476	7248	6950	5270	4852	5204	4928
997	Dand5	1.35667	0.0761617	25	30	15	67	48	73
998	Nusap1	0.585831	0.0764201	362	516	297	579	739	526
999	Pdlim4	0.77633	0.0764201	115	137	80	159	241	200
1000	Tmem150c	-0.571218	0.0764201	551	663	546	402	452	400
1001	C130083M11Rik	-0.580478	0.0764282	441	435	324	272	319	256
1002	Olfr283	-2.9424	0.0764889	20	12	7	1	3	1
1003	Zfp474	-0.731799	0.0788656	257	203	146	141	126	112
1004	Fam131b	-0.712807	0.0788767	284	303	221	188	168	163
1005	Ccdc92b	-0.584411	0.0790896	1036	740	556	466	603	538
1006	1810032O08Rik	0.918246	0.0796252	44	88	76	104	135	174
1007	Vmn1r75	-3.1889	0.0796969	10	11	12	0	2	2
1008	Gm5069	-0.816314	0.0806148	142	155	153	91	94	86
1009	Ncapd2	0.467158	0.0806148	1071	1152	766	1521	1616	1213
1010	Tmem107	-0.501838	0.0812234	795	945	835	574	730	630
1011	Vsnl1	-0.721238	0.0820077	336	424	238	186	218	224
1012	Pxdc1	0.509869	0.0827996	576	544	506	665	982	836
1013	Tmem151a	-0.584768	0.0828406	494	564	456	364	425	290
1014	Gm3317	-2.75131	0.0835393	13	53	14	0	43	0
1015	Gm3488	-2.75156	0.0835393	13	53	14	0	43	0
1016	Jhy	-0.599137	0.0846296	517	570	445	334	351	384
1017	Olfr1032	-2.2712	0.0846296	35	22	24	13	0	9
1018	Enox1	-0.704673	0.0846296	337	349	329	241	180	244
1019	Unc79	-0.565437	0.0847333	646	579	588	454	506	351
1020	Pcdh7	-0.475917	0.0851106	7486	8127	5099	5267	5504	4744
1021	Msantd3	0.737327	0.0851717	134	94	108	183	216	191
1022	Arpp21	0.722935	0.0853468	158	141	113	286	220	214
1023	Scgb2b27	0.750641	0.0862234	9541	5958	19688	12937	20787	23816
1024	Pcsk2	-0.700702	0.0865515	419	375	324	160	266	329
1025	Serpinb3d	-5.29692	0.0865515	5	4	5	0	0	0
1026	Bend4	-0.630029	0.0867801	318	355	243	170	291	178
1027	Gpr162	-0.698653	0.0869468	198	253	206	123	161	146
1028	Gm14391	0.81939	0.0880168	66	86	72	100	171	157
1029	Mmp16	-0.476754	0.0883252	1847	963	897	1124	728	864
1030	Slc50a1	0.574906	0.0883284	331	418	524	531	817	662
1031	Gm37013	-2.4248	0.0883284	56	11	25	9	10	0
1032	Olfr441	-2.74808	0.0886244	8	28	12	2	7	0
1033	Olfr1301	-1.83117	0.0892858	35	33	38	5	30	6
1034	Slc17a4	4.23015	0.0904267	0	0	1	10	3	11
1035	Cldn7	0.479237	0.0910135	753	778	824	1054	1157	1280
1036	Gk5	-0.48719	0.0910597	1073	1039	1018	806	791	771
1037	Stox1	-0.733955	0.0912536	242	177	145	142	138	81
1038	Olfr450	-2.25329	0.0914754	11	34	20	3	3	8
1039	Morf4l1b	5.71489	0.0914754	0	0	0	20	0	2
1040	Vasp	0.493979	0.0914781	513	734	585	667	1094	1008
1041	Olfr1111	-3.20927	0.0914781	7	24	30	5	0	2
1042	Cdh4	-0.579618	0.0915955	579	415	377	278	352	331
1043	Tspo	0.614838	0.0915955	195	247	253	332	383	413
1044	Olfr1183	-0.687792	0.0919592	294	204	164	155	142	128
1045	Olfr1289	1.20045	0.0928298	31	27	15	49	80	48
1046	Cadm3	-0.441692	0.0929404	1738	1468	1732	1181	1391	1281
1047	Sp6	-1.86711	0.0938138	23	13	63	10	0	26
1048	Ano9	0.663154	0.0939741	229	267	171	283	425	415
1049	Tpx2	0.516409	0.0946851	528	531	343	687	816	601
1050	Gapdh	-0.591579	0.0955132	626	787	1031	458	739	523
1051	Slc4a1	0.97794	0.0966588	836	1843	1870	4005	3235	2139
1052	Pkib	-0.811046	0.0966588	1121	3218	1963	1254	1680	763
1053	Olfr1307	-1.05212	0.0969052	65	107	70	32	40	51
1054	Dnah8	-0.675837	0.097224	296	197	191	173	155	121
1055	Dbf4	0.570275	0.099061	379	382	278	410	741	517
1056	Olfr527	0.712037	0.0996613	147	169	101	209	268	238
1057	Tmem151b	-0.45903	0.100111	2563	2843	2048	1737	2003	1971
1058	Gucy2d	0.783797	0.100111	96	57	96	154	110	188
1059	Tac4	0.537811	0.100111	312	306	346	414	491	593
1060	Olfr121	-1.41247	0.100263	41	58	19	17	21	8
1061	Rsph4a	-0.529563	0.100321	832	670	451	464	519	416
1062	Diras1	-0.462525	0.100348	1105	1151	926	740	917	792
1063	Slc6a1	-0.781239	0.10037	479	592	1141	309	648	375
1064	Camk2d	-0.479411	0.10037	9398	10409	7632	6475	7418	6842
1065	1700001J11Rik	-2.47977	0.100633	52	13	12	29	0	1
1066	Als2cr11	5.32639	0.101405	0	0	0	0	14	5
1067	Coch	0.41029	0.101447	4449	3743	3821	5513	5577	5795
1068	Dzank1	-0.432958	0.102464	2606	2348	1629	1685	1912	1502
1069	Olfr1532-ps1	-1.88764	0.103318	23	27	22	3	8	11
1070	Dmtn	-0.428318	0.103318	1558	1584	1326	1115	1261	1140
1071	Twist1	0.611723	0.103489	369	348	509	736	576	659
1072	Lrrn2	-0.668446	0.103729	250	290	270	179	196	166
1073	Olfr1350	-1.33119	0.103729	50	55	35	16	40	10
1074	Olfr148	-2.62671	0.103816	15	25	13	7	2	1
1075	Tnrc6c	-0.4219	0.104196	4384	4330	3570	3048	3259	3385
1076	Trank1	-0.720055	0.105482	233	128	191	123	107	116
1077	St18	0.773418	0.105863	116	181	80	228	246	182
1078	Gpr137b	-0.574857	0.106047	761	1378	1283	656	1098	677
1079	Taar7b	1.52982	0.106155	29	6	8	50	41	23
1080	Dnm3	-0.702574	0.106155	200	262	245	147	162	150
1081	LOC102638913	1.72064	0.106161	773	74	1704	1447	2079	1971
1082	2700054A10Rik	-0.666297	0.106161	251	260	286	114	200	241
1083	Olfr372	-3.82026	0.106161	13	7	21	0	4	0
1084	Olfr78	0.63457	0.106161	184	186	157	252	318	300
1085	Fnbp1	-0.431323	0.106161	2129	2599	1832	1440	2064	1661
1086	2017-09-03	-0.421848	0.106161	5127	4095	3420	3324	3155	3399
1087	Cyp2b10	0.461917	0.106457	881	909	837	1140	1259	1456
1088	Olfr144	-0.879138	0.106717	163	201	109	104	78	84
1089	Habp4	-0.636451	0.107108	315	356	337	221	219	248
1090	Olfr714	-1.11859	0.107834	69	92	62	43	29	36
1091	Usp18	0.513892	0.107911	584	510	466	624	878	880
1092	Tmem181c-ps	-0.569662	0.107933	304	409	340	187	306	270
1093	Clgn	-0.546006	0.108084	14155	13153	9684	8019	8794	9813
1094	Nans	0.535899	0.108359	379	390	400	506	761	558
1095	En2	-0.902707	0.108602	130	155	89	60	66	83
1096	A330023F24Rik	-0.471576	0.109403	918	1105	771	603	882	659
1097	Phospho1	-0.4889	0.109909	1389	1317	830	705	1255	740
1098	Gng4	0.541655	0.109992	356	268	263	479	437	441
1099	Rnf152	-0.546341	0.11055	861	996	781	675	594	639
1100	Arap2	-0.497882	0.11056	2028	2138	1491	1530	1321	1353
1101	Olfr1306	-2.30269	0.11056	20	15	18	6	1	5
1102	Olfr484	-1.07047	0.111502	82	55	54	37	27	31
1103	Pfn2	-0.455269	0.112416	1060	1138	1076	731	1016	809
1104	Espn	0.807447	0.112416	54	94	62	104	170	116
1105	Olfr73	1.38957	0.112416	10	20	19	45	45	44
1106	C230072F16Rik	-0.607087	0.113142	378	320	228	208	274	163
1107	Limch1	-0.389918	0.113175	3850	3175	2812	2583	2717	2598
1108	Abcc4	-0.402254	0.113482	5036	4595	3877	3806	3720	3275
1109	Magea2	5.20503	0.113606	0	0	0	4	6	4
1110	Tubb2b	0.441472	0.114279	2142	1703	1359	2355	2533	2487
1111	Foxi2	0.863642	0.114645	61	46	55	89	115	109
1112	Apba2	-0.49881	0.114645	655	665	653	457	553	476
1113	Ccdc81	-0.75575	0.114645	162	125	157	94	81	103
1114	Dnajb13	-0.658392	0.114905	218	338	283	160	237	168
1115	Pcdha2	-0.564308	0.114905	427	556	354	297	358	293
1116	Gad1	-0.961236	0.115405	61	129	109	45	53	60
1117	Stk17b	0.416195	0.115405	3128	3276	2129	3823	4386	3692
1118	Olfr982	-0.652404	0.115984	271	264	178	170	184	125
1119	Ipo13	-0.414526	0.116165	3307	2807	2520	2000	2406	2450
1120	Etv3	-0.4366	0.116409	2694	2575	1895	2119	1987	1502
1121	Fmn2	-0.436932	0.117352	3171	3345	2432	2483	2381	2098
1122	6430411K18Rik	-5.21516	0.117852	2	6	5	0	0	0
1123	Celf4	-0.465231	0.117919	1260	1663	1223	985	1147	1030
1124	Top2a	0.43543	0.118705	2027	2116	1328	2682	2829	2217
1125	Pon3	-0.409598	0.118965	4326	4006	3637	3463	3342	2772
1126	Olfr420	-1.11359	0.119207	62	62	77	32	44	24
1127	Olfr221	-1.10766	0.119417	53	66	74	31	38	26
1128	Insm1	0.513793	0.120117	1332	1138	658	1441	1609	1506
1129	Saraf	-0.396453	0.120436	6050	6489	5992	4232	5441	5345
1130	Olfr33	0.770027	0.120436	123	183	55	179	273	158
1131	Eomes	-0.727172	0.120436	168	252	143	117	177	76
1132	Rab11fip4	-0.43898	0.120436	2248	2007	1465	1457	1521	1430
1133	Bbs7	-0.438983	0.120797	1274	1574	1036	961	1181	878
1134	C330021F23Rik	0.527404	0.121149	495	693	607	864	981	882
1135	Snrpa	0.735631	0.121999	148	263	155	333	338	299
1136	Dync2h1	-0.470343	0.122034	7253	5585	3609	4315	3950	3856
1137	Proc	-5.26725	0.122068	1	9	4	0	0	0
1138	F930015N05Rik	1.12102	0.122656	25	38	49	85	115	60
1139	Ppip5k1	-0.398949	0.123524	2720	2985	2266	1901	2468	2042
1140	Gcnt2	-0.414538	0.123542	6330	5075	3741	4310	3930	3576
1141	Dbpht2	-0.757297	0.124115	193	237	166	115	113	144
1142	Olfr812	0.546174	0.124115	264	288	278	325	578	417
1143	Gm7534	0.506745	0.124304	412	372	416	519	646	651
1144	Stil	0.505337	0.124435	740	778	445	1031	1024	831
1145	Olfr776	-0.66022	0.124582	242	276	198	165	177	137
1146	Nrsn1	-0.976686	0.125766	74	67	93	24	42	68
1147	4930581F22Rik	-0.759872	0.126436	214	129	145	85	107	108
1148	Acsl6	-0.423942	0.126744	2329	2097	1879	1793	1683	1502
1149	Olfr1305	-1.47382	0.127377	44	24	27	13	12	10
1150	Kpna2	0.427795	0.12751	4306	5851	4176	6185	7888	6266
1151	Dio1	0.763085	0.127518	1141	597	1391	1162	2627	1865
1152	Ift80	-0.382366	0.127718	3989	3758	3090	2890	3103	2783
1153	Olfr324	-1.03107	0.127723	80	53	84	44	36	31
1154	1500009C09Rik	-1.50707	0.127723	31	28	35	12	14	9
1155	Mki67	0.539468	0.12779	1238	1340	963	2349	1660	1501
1156	Kcnj3	0.648502	0.127942	225	232	130	353	324	275
1157	Pnliprp1	1.22683	0.128056	525	138	591	523	1532	951
1158	Gm9833	-4.47304	0.129614	10	40	51	18	0	0
1159	Ran	0.434583	0.129634	1413	1922	1259	2045	2581	1911
1160	Gm7334	-5.69632	0.130816	0	0	25	0	0	0
1161	Olfr769	0.577392	0.130816	310	390	284	559	585	417
1162	Churc1	0.651043	0.130816	474	451	750	1142	727	900
1163	Fut1	0.624235	0.131329	256	175	143	323	287	304
1164	Tsnaxip1	-0.74792	0.13148	141	168	126	81	107	87
1165	Krtcap2	5.20761	0.13148	0	0	0	5	0	10
1166	Trim63	3.57849	0.13148	3	0	0	16	3	10
1167	Olfr459	-1.05739	0.132837	89	131	68	59	36	48
1168	Olfr1347	1.06895	0.134181	26	29	43	53	104	66
1169	Gucy1b2	1.11542	0.13478	28	33	16	55	72	47
1170	Olfr521	-3.4614	0.135604	9	14	15	0	7	0
1171	Dyrk2	-0.473897	0.135611	936	726	707	638	565	593
1172	Wdsub1	-0.410543	0.136726	5910	6452	4955	4178	5094	4511
1173	5430401F13Rik	1.78436	0.136726	203	18	526	442	610	539
1174	Kcng1	-0.916875	0.136726	35	142	181	30	89	68
1175	Hmga1-rs1	-5.7965	0.136917	0	25	0	0	0	0
1176	Plac9b	1.21884	0.13713	16	31	22	59	60	49
1177	Olfr16	0.579429	0.138307	345	444	302	539	573	598
1178	Olfr1474	-5.10018	0.138543	9	4	1	0	0	0
1179	Olfr987	0.794912	0.138572	114	86	70	118	215	169
1180	Eef1a2	-0.478323	0.138572	938	709	694	653	535	582
1181	Lactb	0.638768	0.138572	175	127	154	242	208	305
1182	Pcdhgb1	-0.714743	0.138572	228	288	208	164	141	159
1183	Cacnb3	-0.514405	0.138572	631	764	743	496	651	454
1184	Hyal3	0.699825	0.138592	103	116	90	168	204	161
1185	Slc16a6	-0.504449	0.138673	1264	1311	905	847	826	896
1186	Phyhipl	-0.47948	0.138701	872	1191	782	685	859	609
1187	Ifi27	0.597782	0.138801	209	199	317	308	448	398
1188	Olfr872	-1.67925	0.139463	15	90	32	14	14	9
1189	Cdip1	-0.411551	0.139472	5703	7116	6015	4595	5999	4492
1190	Slc22a23	-0.382574	0.139525	3027	3092	2714	2225	2671	2302
1191	Ahi1	-0.423051	0.139914	1714	1864	1762	1267	1434	1534
1192	Tmeff2	-1.56349	0.140935	20	43	23	8	13	9
1193	Tmem130	-0.485585	0.140935	651	669	575	421	529	489
1194	Klhl42	-0.437056	0.140951	1971	1592	1109	1273	1179	1117
1195	Akap3	-0.962976	0.142147	69	118	62	33	50	50
1196	Sptb	0.661235	0.142339	315	401	366	755	592	492
1197	Extl1	-0.592084	0.143157	313	341	231	182	253	187
1198	Olfr1318	0.633672	0.143174	178	325	190	337	427	345
1199	Cngb3	1.48957	0.143625	9	12	11	15	41	49
1200	Iffo1	-0.535956	0.143971	390	350	353	225	310	270
1201	Uqcc3	1.5397	0.14474	6	16	12	31	32	39
1202	Bhlhe41	-0.492037	0.145069	12859	14171	13984	7005	12799	12184
1203	Tshz1	0.425452	0.145069	4255	3751	2884	5019	4975	5331
1204	Pclaf	0.509882	0.145316	468	322	420	673	571	567
1205	Olfr137	-1.22998	0.145334	47	55	29	19	23	16
1206	P4htm	-0.591417	0.146665	365	328	301	214	223	263
1207	Krt8	0.382656	0.146665	4459	5046	4466	5620	7341	6441
1208	E030024N20Rik	0.984108	0.146886	59	36	33	140	47	93
1209	Slc32a1	-3.28749	0.146952	2	11	23	0	0	6
1210	Olfr483	-1.7407	0.147125	29	23	18	7	12	4
1211	Rrm2	0.575017	0.147129	909	2063	1207	2014	2681	1672
1212	Cdc34	0.80695	0.147345	83	64	65	106	184	113
1213	Olfr1273-ps	-1.1587	0.148174	49	39	59	17	27	26
1214	Fdps	0.412294	0.148472	1248	1388	1114	1397	2105	1846
1215	Olfr963	-2.77325	0.148472	11	14	14	2	5	0
1216	Olfr491	-1.72908	0.148769	12	60	60	12	7	18
1217	A4gnt	1.19661	0.148865	483	51	1157	565	596	1524
1218	Kcnmb2	-0.512831	0.149108	1430	2054	1449	1264	1249	1109
1219	Mir9-3hg	-2.42878	0.149675	18	7	14	3	2	2
1220	Gadd45g	0.776119	0.149675	70	67	53	104	149	96
1221	Olfr149	-5.04332	0.150259	6	1	6	0	0	0
1222	Trappc2	-0.443116	0.150263	1087	1915	1227	905	1433	939
1223	Plk4	0.409156	0.150263	1130	1049	857	1462	1512	1284
1224	Vmn2r87	3.43398	0.150661	4	0	0	15	6	9
1225	Lrtm2	-1.85005	0.15073	19	27	19	2	10	9
1226	Epb41	0.391305	0.15073	4947	4152	4054	6226	6317	5699
1227	Olfr713	-0.961386	0.152271	103	144	90	83	47	54
1228	Basp1	0.385057	0.152367	1713	1577	1315	1971	2428	1973
1229	Cox16	0.553467	0.152556	455	520	704	768	1042	786
1230	Olfr1251	-0.68892	0.153318	207	291	170	161	171	106
1231	Rrm1	0.461588	0.153982	2658	3762	2456	4597	5032	3316
1232	Trnp1	-0.519757	0.153982	583	585	447	316	474	412
1233	Fam134b	-0.401262	0.153982	6096	6601	4898	4557	5327	4206
1234	Grhl3	1.5546	0.154069	12	11	8	20	30	55
1235	Clip4	-0.436601	0.154069	1445	1523	1091	891	1166	1114
1236	Gp2	-0.769686	0.154069	371	384	380	100	296	420
1237	Olfr611	0.623569	0.1546	171	163	134	212	293	263
1238	Atp8b4	0.443504	0.154709	2561	2762	2061	3629	3308	3639
1239	Fcgr4	1.94274	0.155084	1	5	11	8	24	33
1240	Tjp3	0.434643	0.155156	831	833	880	1120	1347	1190
1241	Cryba2	5.10157	0.155406	0	0	0	8	2	3
1242	Gm20199	1.37086	0.155452	20	15	32	134	27	54
1243	Olfr632	0.713041	0.155452	85	199	121	179	279	222
1244	B4galnt1	0.59153	0.155512	324	283	478	481	678	551
1245	Olfr1404	0.56997	0.156554	232	269	193	313	410	368
1246	Olfr1277	-0.637032	0.156671	285	222	179	188	143	133
1247	Mvb12a	0.641434	0.15775	121	196	232	222	379	301
1248	Olfr31	-0.542497	0.157947	769	568	750	654	450	428
1249	Rad54l	0.779213	0.158186	74	73	67	143	124	123
1250	Aqp9	1.24432	0.158268	14	41	57	95	58	112
1251	9230105E05Rik	1.39638	0.158268	14	12	10	29	36	36
1252	Olfr435	-2.0362	0.158268	10	25	23	5	5	4
1253	P4ha3	0.899199	0.158268	52	43	30	88	103	57
1254	Cfap44	-0.380465	0.158314	4140	3374	2563	2590	2960	2528
1255	Gmppa	0.525176	0.158593	307	310	359	376	663	487
1256	Olfr166	0.516675	0.15863	1639	1692	1083	2429	1905	2261
1257	Olfr143	0.746577	0.158881	113	134	137	272	185	233
1258	Olfr175-ps1	-1.53333	0.159255	21	45	20	6	26	5
1259	Olfr740	0.588374	0.159605	232	245	186	348	357	346
1260	Tuba1b	0.444002	0.159747	7131	8556	8169	9702	13777	11202
1261	Panx2	-1.06595	0.160067	117	41	89	36	48	33
1262	H19	0.456633	0.160726	1016	902	694	1117	1924	910
1263	Eef1b2	0.392874	0.161088	1674	1403	1813	1939	2345	2530
1264	Scg3	-0.55645	0.161088	379	479	556	315	363	333
1265	Olfr391-ps	-0.797233	0.161088	149	131	116	92	61	90
1266	Adgrl3	-0.380134	0.161088	4898	3996	3274	3532	3214	3055
1267	Rp2	-0.499327	0.161088	6695	9749	5338	5397	5650	4814
1268	Pnmal2	-0.703797	0.161205	346	160	304	138	185	184
1269	Cend1	-0.435444	0.161831	1021	1276	968	749	1013	803
1270	Gm17019	3.35613	0.16187	0	6	0	19	17	5
1271	BC055402	1.38806	0.162062	13	33	5	35	60	28
1272	Agpat4	-0.511389	0.162464	529	465	368	327	343	333
1273	Kat2b	-0.380206	0.162464	4055	3877	3154	2821	3104	3065
1274	Irs2	-0.496382	0.162706	694	574	489	438	423	447
1275	Dlgap5	0.724044	0.162915	103	133	109	223	198	183
1276	Olfr781	1.25964	0.163841	18	22	11	47	44	36
1277	Olfr1467	-0.898483	0.164177	90	99	71	61	46	41
1278	Fbxl16	-0.490443	0.164437	640	898	747	519	688	519
1279	Olfr1232	-0.801033	0.164629	127	215	125	106	112	65
1280	Fcgrt	0.461054	0.164705	535	613	528	726	901	825
1281	Ifi27l2a	0.610642	0.165993	132	177	215	143	367	399
1282	Mlxip	-0.367494	0.167644	4719	3819	3550	3115	3398	3359
1283	Gpr85	0.803321	0.168125	62	55	61	83	151	105
1284	Frmd4a	0.427823	0.168364	1201	1233	987	1721	1591	1550
1285	Olfr1312	-0.683579	0.168368	305	389	272	231	180	222
1286	Gm38509	3.95438	0.16845	1	0	0	3	7	14
1287	Grm3	-2.5368	0.169727	18	15	6	5	3	0
1288	Sco2	-3.16989	0.170134	9	33	43	0	44	0
1289	Nsf	-0.395843	0.172687	1708	1501	1511	1127	1431	1258
1290	Lrit1	-4.98784	0.173087	5	6	1	0	0	0
1291	Cacna1e	0.563139	0.17384	322	251	195	471	334	385
1292	Apc2	-0.461974	0.17384	751	598	641	477	569	484
1293	Olfr666	0.60371	0.174528	192	257	155	255	375	338
1294	Lmna	0.419726	0.174681	971	1244	919	1388	1675	1366
1295	Rabgap1l	-0.428866	0.174681	6276	7246	4816	4794	5112	4369
1296	Actl6b	0.715182	0.175224	120	110	69	153	187	171
1297	Igsf9b	-0.421144	0.175475	2485	2375	1937	1877	1707	1772
1298	Olfr1391	0.695115	0.175572	211	174	86	265	256	243
1299	Kazn	-0.372732	0.175572	3437	3736	2961	2757	3208	2363
1300	Slc9a7	-0.747631	0.175619	241	177	100	126	88	98
1301	Tuba1c	0.439431	0.175619	1438	2311	1478	2035	2867	2508
1302	Scg2	0.587656	0.17592	184	258	205	308	380	339
1303	Rtn2	-0.634081	0.176	267	260	241	184	224	128
1304	Susd4	-0.501842	0.176	397	435	409	243	380	321
1305	Clec12b	4.95674	0.176	0	0	0	3	6	3
1306	Phtf2	-0.455333	0.176	1937	2755	1993	1654	1857	1605
1307	Olfr1288	0.957628	0.176	46	28	35	72	88	63
1308	D2hgdh	0.474737	0.176	1508	1753	893	1883	2154	1871
1309	Neurod2	-3.50394	0.178094	4	15	5	0	3	0
1310	Olfr1360	-5.23923	0.178648	0	12	3	0	0	0
1311	Olfr635	-1.47424	0.178963	32	33	32	11	24	6
1312	Olfr508	-1.16131	0.179588	31	86	51	22	29	24
1313	4922502D21Rik	5.15874	0.179744	0	0	0	6	9	0
1314	Olfr905	-4.91498	0.180664	5	4	2	0	0	0
1315	Tmem200c	-0.595923	0.180901	376	439	279	292	243	224
1316	Olfr1394	-1.65484	0.181679	32	35	27	22	12	3
1317	Cfap58	-0.645675	0.182303	263	199	210	122	143	195
1318	Acot3	4.93326	0.182501	0	0	0	2	5	5
1319	Tinag	4.93325	0.182632	0	0	0	2	5	5
1320	Map3k19	-0.386184	0.182632	1843	1750	1588	1344	1511	1348
1321	Olfr1348	0.483046	0.182945	350	314	335	454	491	538
1322	Olfr701	-0.631603	0.183239	409	559	260	230	291	288
1323	Sybu	-0.680384	0.184781	222	168	145	94	142	117
1324	Syngr2	0.374001	0.18493	1733	2348	2154	2247	3575	2836
1325	Olfr612	0.708673	0.186069	56	113	114	103	181	207
1326	Olfr473	-1.44726	0.186731	25	45	23	13	13	9
1327	Olfr1192-ps1	-0.433084	0.186855	1703	1540	1460	1417	1139	1149
1328	Shisa9	-0.812336	0.187579	66	100	105	37	66	63
1329	Myo5b	-0.351882	0.188314	4228	3710	3162	2981	3313	2883
1330	Iqcg	-0.387669	0.188314	1535	1475	1219	1008	1295	1127
1331	Cdk18	0.430606	0.189374	884	860	1132	1069	1733	1358
1332	Olfr510	-2.35562	0.189374	10	16	17	2	1	7
1333	Tdgf1	-3.87027	0.189514	12	3	3	1	0	0
1334	Ccdc57	-0.662254	0.190309	230	172	158	121	110	141
1335	Hymai	2.02941	0.190697	11	3	1	29	12	13
1336	Astn2	-0.419695	0.19079	1445	1270	937	1001	947	905
1337	Gria4	-0.758755	0.191259	92	108	126	60	62	83
1338	Taar7e	0.933119	0.191759	20	81	60	66	116	120
1339	Gm38431	5.09816	0.191826	0	0	0	7	7	0
1340	Asf1b	0.794684	0.19204	81	217	147	249	292	232
1341	Rps7	0.409042	0.192121	2207	2276	2311	3364	3341	2887
1342	Psmb8	1.11021	0.192201	22	26	29	70	44	65
1343	Syt6	-0.649376	0.192278	198	204	273	123	195	142
1344	Btaf1	-0.382705	0.192278	5699	4778	4319	3614	4034	4344
1345	Tbc1d32	-0.384346	0.192278	2789	2875	2490	2267	2475	1909
1346	Cdh24	0.723849	0.192679	163	141	80	199	209	244
1347	Olfr212	-0.734683	0.192689	91	157	91	55	97	64
1348	Racgap1	0.444391	0.192766	1075	1314	1047	1788	1849	1347
1349	Olfr126	-2.39024	0.19345	19	20	35	17	3	1
1350	Hbb-b1	3.57957	0.19345	0	2	0	6	12	5
1351	Megf9	-0.433381	0.19345	2396	1594	1224	1599	1120	1265
1352	Olfr1131	-5.02796	0.19345	6	0	8	0	0	0
1353	Nek10	-0.524583	0.19345	619	326	312	378	225	296
1354	Cnmd	1.01784	0.19345	38	194	92	185	429	90
1355	Olfr482	-1.17854	0.194134	46	58	24	22	31	9
1356	Olfr259	-1.09504	0.194164	158	175	46	47	52	69
1357	Olfr414	0.590097	0.194164	293	379	233	445	449	529
1358	Mbp	-0.575813	0.194426	837	1586	1332	783	779	1045
1359	Camk2a	-0.470139	0.194988	569	605	551	410	481	432
1360	Cd55	0.387315	0.194988	1046	972	1000	1300	1406	1485
1361	Moxd2	-0.469916	0.19589	1296	1503	1433	1119	1354	825
1362	Olfr821	-0.758181	0.196124	135	190	169	102	149	69
1363	Olfr1024	-4.95077	0.196234	1	6	4	0	0	0
1364	Usp20	-0.430226	0.196624	1191	916	762	691	825	712
1365	Bace1	-0.367096	0.196943	4264	3288	2743	2694	2869	2769
1366	Dach1	0.543381	0.196974	328	380	282	564	502	459
1367	Elmo2	-0.379346	0.19708	2233	2413	1926	1644	2061	1661
1368	Col2a1	1.41914	0.197231	280	3683	701	3658	8607	636
1369	Ccdc39	-0.382924	0.197327	2769	2782	2153	2081	2185	1963
1370	Lyrm4	0.530553	0.198241	522	774	611	804	884	1247
1371	Masp2	-1.41805	0.198418	40	38	25	15	8	18
1372	Gm10745	3.91285	0.198418	1	0	0	9	2	7
1373	Smim14	0.353627	0.198418	3007	2487	2786	3346	4219	3674
1374	Rap2a	-0.424181	0.198418	1285	1282	978	994	969	826
1375	A830010M20Rik	-0.3813	0.200122	2237	2260	1510	1651	1817	1375
1376	Traf3ip1	-0.353707	0.200469	3499	3755	2895	2573	3173	2665
1377	Gdap1	-0.429977	0.201034	2252	2853	1931	1757	1929	1786
1378	Olfr659	-1.64075	0.202516	26	37	25	14	19	2
1379	3300002I08Rik	4.93311	0.202983	0	0	0	4	1	7
1380	Vmn2r34	2.85002	0.202983	2	2	0	6	14	12
1381	Higd1b	5.10024	0.202983	0	0	0	8	6	0
1382	Iqsec2	-0.378181	0.203056	1583	1595	1222	1045	1395	1151
1383	Homer2	-0.499994	0.203056	21962	20530	13527	14380	14595	12257
1384	Klk1b21	-4.83612	0.203462	3	3	4	0	0	0
1385	Olfr862	-3.09557	0.203462	3	18	6	1	2	0
1386	Olfr15	0.405101	0.203805	1667	1295	1243	2296	1687	1916
1387	Aspm	0.53677	0.203805	326	322	210	534	433	347
1388	Cyp2d26	5.03665	0.204031	0	0	0	5	9	0
1389	Mcm2	0.484935	0.204448	366	377	368	519	624	513
1390	Rps6kc1	-0.491406	0.205874	820	833	664	606	524	612
1391	Gap43	0.501432	0.206136	505	442	366	502	744	741
1392	Slfn9	0.498788	0.206704	418	327	168	527	489	303
1393	Pde6g	-4.97776	0.20699	7	6	0	0	0	0
1394	Olfr1167	-0.675001	0.207403	156	208	163	115	122	111
1395	Ckap2l	0.542123	0.20743	239	341	211	391	457	357
1396	Rassf4	-0.386874	0.207899	4798	3957	2812	3421	2935	2838
1397	Mapkbp1	-0.369246	0.208551	2120	2286	1678	1602	1955	1438
1398	Olfr578	0.655064	0.208661	122	153	149	230	306	184
1399	Gm5607	0.751682	0.208701	101	64	130	171	185	154
1400	Vmn2r29	0.72905	0.20916	248	375	142	402	395	458
1401	Cfap100	-0.421518	0.210489	1150	1178	924	680	1027	890
1402	Cldn22	-2.17246	0.210768	10	23	26	6	1	7
1403	Vmn2r43	1.51599	0.211023	53	114	8	106	118	166
1404	Smpd3	0.372766	0.211288	1669	1748	1094	1755	2835	1662
1405	Olfr877	-1.29281	0.211366	45	54	50	39	18	13
1406	Olfr340	5.02761	0.211503	0	0	0	6	0	7
1407	Snrnp27	0.553833	0.211503	477	794	654	968	939	1035
1408	Kif2c	0.72213	0.214445	110	146	72	161	198	199
1409	Plekhm1	-0.425465	0.214548	855	832	782	622	740	595
1410	Gm10125	-2.16016	0.214652	18	22	16	6	11	0
1411	Nrxn3	-0.70478	0.215134	139	116	130	85	76	89
1412	Ip6k2	-0.397911	0.215558	1330	1222	1118	955	952	1042
1413	Fam171a2	0.461372	0.215642	461	534	429	659	744	672
1414	1810046K07Rik	-1.61435	0.215642	45	9	23	9	3	13
1415	Pdzd4	-0.45016	0.217344	813	869	646	636	674	498
1416	Crocc	-0.490191	0.217344	475	391	387	269	339	339
1417	Blvrb	0.75126	0.217344	98	198	149	278	270	226
1418	Pnpo	0.382041	0.21766	910	1072	1153	1191	1625	1537
1419	Itih3	-3.24772	0.219227	3	7	9	0	1	1
1420	Olfr798	0.679996	0.219227	124	173	99	176	231	260
1421	4930426D05Rik	0.582756	0.220438	113	172	201	175	290	312
1422	Mcc	-0.360896	0.220529	2595	2592	2053	1740	2386	1874
1423	Gata1	1.53775	0.22084	3	29	12	35	53	27
1424	Col9a1	0.613765	0.22084	239	780	335	559	1331	362
1425	Lztfl1	-0.349853	0.221389	3916	3769	2915	2754	3190	2824
1426	Olfr1073-ps1	5.04688	0.222509	0	0	0	12	0	2
1427	Bmp5	0.580632	0.22261	215	385	188	388	471	344
1428	Olfr205	0.684464	0.222731	85	168	84	178	259	131
1429	Spats2	0.473533	0.222826	901	728	526	961	1022	1128
1430	Plet1os	-4.7541	0.223317	5	2	3	0	0	0
1431	Enkur	-0.642739	0.223613	204	283	170	121	158	162
1432	Ostc	0.402346	0.224347	800	800	847	959	1347	1156
1433	Olfr102	2.4991	0.224997	0	17	3	14	18	42
1434	Olfr1118	-1.69382	0.225007	52	27	31	3	30	11
1435	Olfr1168	0.712678	0.22602	160	199	95	221	252	292
1436	Olfr494	-2.44456	0.226557	14	22	16	9	4	0
1437	Gm19557	-1.24917	0.228288	33	27	42	16	12	17
1438	2810408A11Rik	0.840889	0.228288	43	75	34	76	112	92
1439	Gtpbp6	0.787619	0.228288	40	80	60	84	118	123
1440	Tmod1	0.505117	0.228288	502	900	480	858	1061	817
1441	Cyyr1	-1.34943	0.228508	45	25	34	13	22	9
1442	Cyb5d2	-0.533867	0.228707	315	351	294	219	262	223
1443	Olfr911-ps1	-1.34551	0.228707	61	4	82	25	5	19
1444	Olfr806	0.600653	0.231465	154	170	128	238	245	240
1445	Cyp4f17	0.589213	0.231465	184	133	128	226	225	251
1446	D030025P21Rik	-1.11556	0.231715	56	45	34	30	18	18
1447	Olfr1451	-1.85455	0.231715	26	7	27	12	1	6
1448	Gm15326	-4.79546	0.231925	2	6	2	0	0	0
1449	Gadd45a	0.685297	0.231971	146	357	263	401	452	388
1450	Erdr1	-0.824378	0.231971	54	88	115	34	44	79
1451	Olfr642	0.739024	0.232371	55	74	57	97	154	86
1452	Bpifa5	4.83706	0.233176	0	0	0	1	2	10
1453	Arhgap44	-0.419192	0.233382	887	776	714	595	702	587
1454	Pif1	0.67638	0.233731	89	107	94	164	166	161
1455	Olfr1505	0.595469	0.234351	140	132	138	218	215	224
1456	Commd9	0.587342	0.234683	144	127	136	183	249	221
1457	Olfr1094	-1.71588	0.234755	22	27	23	11	13	2
1458	Nt5dc2	0.516502	0.234918	307	335	272	507	440	438
1459	Olfr64	0.547986	0.236126	313	331	237	495	400	462
1460	Pm20d2	-0.376705	0.236697	2028	2319	1626	1436	1831	1587
1461	Cd81	-0.412709	0.237006	4161	4839	6636	3514	4538	4239
1462	Olfr214	0.78624	0.237396	85	109	64	150	132	185
1463	Zmym1	-0.431085	0.237396	2193	2479	1622	1618	1601	1656
1464	Selenow	0.457085	0.237396	704	859	570	976	1053	1037
1465	Olfr802	-0.789518	0.237653	99	108	91	66	51	66
1466	Cilp2	0.772869	0.238603	78	152	100	179	389	98
1467	Olfr1226	0.509103	0.238743	1123	1078	695	1550	1179	1581
1468	Rab36	-0.362515	0.239377	2235	2439	2214	1641	2103	1964
1469	Gm20767	0.611067	0.239377	277	90	99	305	211	167
1470	Ppm1e	-0.507473	0.239731	430	487	417	358	380	266
1471	Gm29968	-0.53839	0.241838	636	455	325	416	262	335
1472	Olfr1442	0.49585	0.241879	232	252	236	305	402	377
1473	Atp4a	-3.17058	0.242908	4	6	8	0	1	1
1474	A530050N04Rik	-0.760695	0.242908	90	117	99	60	61	70
1475	Casp7	0.453796	0.242943	312	570	513	454	930	667
1476	Sv2b	-0.394022	0.242943	1400	1817	1269	1104	1333	1155
1477	Phgdh	0.399823	0.242978	1844	1315	2102	1981	2643	2673
1478	Adh6a	2.10925	0.243461	0	1	16	5	5	52
1479	Itih5l-ps	1.0813	0.2439	17	81	51	84	220	46
1480	Bzrap1	-0.352826	0.243993	2395	2512	2243	1612	2402	1996
1481	Ttc8	-0.428427	0.244494	906	1109	744	622	827	713
1482	Rps2	0.341039	0.244877	2559	2657	3133	2735	4548	4152
1483	Gm21948	-3.81343	0.246819	12	50	14	20	0	0
1484	Cdyl2	0.436246	0.246955	1550	1664	1121	2562	2076	1607
1485	Olfr153	-3.55228	0.247074	8	12	1	0	2	0
1486	Gatsl2	-0.400868	0.24813	1075	890	747	733	779	649
1487	Cers1	-5.35954	0.248156	0	0	22	0	0	0
1488	H2-DMb1	-1.19614	0.248239	46	36	33	13	16	25
1489	Eno1b	2.40844	0.248239	8	6	0	7	31	53
1490	Kif20a	0.52875	0.248396	310	253	159	349	407	318
1491	Pcdhac2	0.435114	0.248431	2401	1296	1332	2097	2387	2442
1492	BC055324	0.554788	0.250359	209	262	159	312	358	297
1493	Matn3	1.70254	0.250444	26	528	107	693	1414	94
1494	Clspn	0.685374	0.250444	73	98	89	132	154	157
1495	Rnf167	0.381651	0.250444	1481	1625	1208	1465	2528	2071
1496	Knstrn	0.595745	0.251048	227	217	100	345	284	210
1497	Gm17644	0.435353	0.252199	1109	656	490	1490	821	858
1498	Ppm1h	-0.475881	0.252199	16315	17090	15626	8441	15279	14975
1499	AA536875	1.41622	0.252586	9	9	12	35	23	28
1500	Fxn	0.647368	0.253365	94	108	88	147	175	160
1501	Ttk	0.685538	0.253365	88	157	71	182	223	122
1502	Id4	-0.362229	0.254441	2030	1720	1475	1436	1485	1357
1503	Kif11	0.432059	0.254458	1335	1652	1278	2208	2086	1796
1504	Stx8	0.499984	0.254897	372	436	339	560	550	603
1505	Dlg4	-0.402042	0.255731	2355	1573	1424	1243	1589	1381
1506	Comp	0.710506	0.256096	175	794	249	535	1370	251
1507	Olfr115	-0.7665	0.257099	92	180	61	73	96	35
1508	St6galnac1	1.24392	0.259737	34	206	189	320	204	387
1509	4930556M19Rik	0.604274	0.25996	134	84	132	183	145	234
1510	Birc5	0.639612	0.260123	206	376	280	523	598	317
1511	Calcoco2	-0.760777	0.260807	100	94	102	73	59	54
1512	Sp100	0.353913	0.260827	1165	1003	1302	1311	1520	1901
1513	Olfr873	0.402326	0.260883	1213	1789	1671	1557	2170	2955
1514	Olfr247	-4.75633	0.262134	10	0	3	0	0	0
1515	Slc25a33	-0.46346	0.263261	705	840	599	566	552	517
1516	Wdr35	-0.343925	0.263261	3075	2761	2280	2077	2490	2185
1517	Trpc2	0.441189	0.263261	1206	1060	790	1168	1537	1686
1518	Rpl17	0.62464	0.263645	165	128	126	225	173	297
1519	Zcchc10	0.515222	0.265001	183	242	233	240	442	339
1520	Cep290	-0.396891	0.265525	1939	1318	1174	1412	939	1180
1521	Lrrk2	0.530032	0.265598	289	357	236	478	441	416
1522	Kif27	-0.423169	0.266	1154	1103	856	834	774	835
1523	Rps15a	0.413254	0.266943	2791	3833	3071	4494	4612	4471
1524	Cdhr1	-0.37613	0.269512	2503	2300	1881	1653	1867	1916
1525	Impdh2	0.408333	0.269673	823	953	865	1210	1404	1115
1526	A730043L09Rik	3.73826	0.269673	0	1	0	6	9	2
1527	Olfr402	-3.36142	0.269673	10	11	2	0	3	0
1528	Car2	0.582197	0.272607	2564	4108	4418	6201	6841	4421
1529	Ankrd29	-0.701407	0.273446	147	141	77	64	100	70
1530	Casp8	0.447989	0.273553	406	395	403	473	728	568
1531	Synj1	-0.398314	0.274173	2590	3865	3100	2403	3052	2211
1532	Cpne9	0.558029	0.274173	222	508	279	446	637	429
1533	Adipor1	-0.382454	0.274173	6810	8082	6911	5630	7276	5002
1534	Gm21992	6.43337	0.274173	0	0	39	283	88	0
1535	Olfr58	-1.76323	0.274173	26	45	16	13	3	10
1536	Bbs1	-0.373691	0.274173	2654	2611	1805	1722	2145	1860
1537	Olfr341	-1.68669	0.27497	29	30	18	4	31	3
1538	Dennd6b	-0.454212	0.275523	434	442	531	277	419	407
1539	Nhlh1	0.488029	0.275523	2601	1368	1322	2042	2911	2594
1540	Clk2-scamp3	0.75729	0.276059	96	341	259	312	644	253
1541	Olfr1387	0.558096	0.276607	219	227	99	288	335	198
1542	Cacng4	-0.812784	0.279598	103	75	54	43	55	39
1543	Rnf150	-0.348969	0.280823	4620	4535	3423	3424	3612	3349
1544	Apold1	-0.624079	0.281093	255	273	265	168	136	259
1545	Fam189a2	0.43334	0.281295	398	406	455	520	615	676
1546	Lrrn3	0.398294	0.281586	789	789	529	983	1123	816
1547	Cyp4a12a	-1.19662	0.281808	78	99	81	11	39	123
1548	Gm5640	3.31408	0.281808	0	3	0	10	14	2
1549	Ssx2ip	-0.35925	0.283222	5859	6231	4635	4485	5072	4205
1550	Olfr733	0.554391	0.284071	297	511	258	480	579	536
1551	Cplx2	-0.356165	0.284464	5597	5411	4121	3466	4879	4200
1552	Myrfl	-1.90055	0.284807	13	18	12	4	5	3
1553	Olfr270	-1.70942	0.284978	42	28	42	21	23	1
1554	Cacna1b	-0.367995	0.286186	5005	4051	3039	3656	3007	3110
1555	Mbnl3	-0.413466	0.286631	2871	2839	1816	2414	1861	1661
1556	Gpc5	-1.60319	0.286631	15	20	39	10	7	7
1557	Pak6	-0.477806	0.286631	364	483	666	298	366	478
1558	Gm10081	1.28252	0.287779	18	12	31	52	74	31
1559	Plekhm3	-0.399602	0.287779	2304	1857	1279	1609	1322	1338
1560	Prc1	0.432094	0.287779	602	651	557	921	975	712
1561	Efna3	-0.404516	0.28862	889	768	625	622	661	534
1562	Oaz1	0.453733	0.288796	410	541	620	636	923	721
1563	4930567H12Rik	-1.10734	0.2889	63	30	35	17	21	22
1564	Olfr1291-ps1	0.705652	0.289529	183	304	158	416	306	356
1565	Hectd2	-0.47014	0.289529	505	675	518	423	497	378
1566	Rpl18a	0.464077	0.289529	14286	14935	16960	16972	25575	26108
1567	Dbn1	0.385844	0.28969	900	889	736	1102	1255	1134
1568	Olfr857	-0.874158	0.28969	80	104	34	39	51	29
1569	Ccdc28a	0.449998	0.29005	451	398	279	591	585	441
1570	Olfr628	-4.57962	0.290152	5	2	2	0	0	0
1571	9630001P10Rik	0.783022	0.29068	54	42	52	114	75	83
1572	Mrps24	0.456423	0.291607	342	332	346	454	477	559
1573	Ctss	0.54118	0.29199	232	440	271	430	520	460
1574	Myh3	1.82069	0.292113	6	3	4	25	14	11
1575	Lrrc61	-0.448051	0.293668	473	562	360	314	437	329
1576	Ttbk1	-0.481174	0.294142	481	325	294	303	241	276
1577	Ppp1r42	-0.574821	0.294142	207	345	232	142	205	207
1578	Rnf157	-0.391148	0.294705	1657	1064	883	914	1095	824
1579	Nlrp6	-2.7007	0.294803	10	13	6	0	2	3
1580	Olfr823	-2.35829	0.294803	5	25	19	3	8	0
1581	Epb42	0.854261	0.296406	102	178	202	418	295	220
1582	Mettl23	-0.466673	0.296406	501	483	415	270	481	348
1583	Rchy1	0.325307	0.296984	3420	3426	3013	3559	5175	4498
1584	Olfr620	0.594088	0.29751	148	112	107	184	181	219
1585	Rtn4rl1	-0.433621	0.297636	924	1615	1200	862	1132	894
1586	Fgfbp3	-0.741474	0.299729	202	114	147	62	124	110
1587	Obfc1	0.504503	0.301758	390	262	251	361	502	483
1588	Glrx5	0.755364	0.301758	56	70	43	68	125	115
1589	Gm6034	2.28801	0.301758	0	6	3	9	18	13
1590	Bglap3	0.838901	0.301758	21	60	50	52	102	88
1591	Parp14	-0.417452	0.301758	1691	1334	1002	925	1071	1146
1592	Olfr901	0.715605	0.301758	85	107	63	125	144	171
1593	Urgcp	-0.436256	0.301849	633	576	536	397	461	514
1594	Slc17a7	-1.43421	0.301849	42	32	34	27	3	20
1595	Tarsl2	-0.340428	0.303164	2975	3130	2270	2239	2609	2128
1596	Neurod1	0.426675	0.303164	791	876	569	1029	1077	1033
1597	Map4k2	-0.349991	0.303164	1348	1280	1352	926	1177	1233
1598	Sox11	0.538772	0.303164	17767	18886	9494	22984	23608	21485
1599	Olfr679	0.680807	0.304604	106	121	82	202	147	174
1600	Ercc6l	0.568256	0.306063	152	129	113	228	228	165
1601	Mup4	0.918449	0.306063	81062	33658	184379	87232	163200	291955
1602	Tm7sf2	0.438931	0.307044	423	471	390	445	747	694
1603	Cdr2	0.447134	0.307044	366	478	452	557	723	596
1604	Rsl1	-0.983713	0.307834	66	60	47	42	21	31
1605	Slc22a14	4.61093	0.307834	0	0	0	4	3	2
1606	Slfn3	0.704306	0.307834	78	112	55	170	175	83
1607	Dcpp3	-0.944231	0.308717	102	209	64	18	140	79
1608	Tekt5	4.70348	0.309453	0	0	0	0	6	6
1609	Rraga	0.346366	0.309503	1158	1161	1171	1229	1907	1646
1610	Trim17	-1.70477	0.309558	25	18	23	14	8	2
1611	Sel1l2	-4.74854	0.309718	0	6	4	0	0	0
1612	Wdfy2	-0.493458	0.310272	354	306	294	225	249	243
1613	Slc2a5	1.15522	0.311214	24	11	19	38	56	33
1614	Lipo2	-4.73483	0.311214	0	4	6	0	0	0
1615	Kcnc1	-0.560446	0.311214	195	233	220	143	162	161
1616	Magi2	-0.393034	0.311214	1010	1284	893	732	970	861
1617	Stk11ip	-0.341038	0.311214	3144	2951	2430	1997	2708	2448
1618	Olfr874	-1.107	0.312273	63	17	62	16	17	31
1619	Rnh1	0.358444	0.312418	4644	6068	4907	6204	7922	7076
1620	Olfr995	1.45703	0.312418	15	7	8	16	40	34
1621	Kel	0.911491	0.312418	52	129	84	235	192	106
1622	A430035B10Rik	-0.503023	0.312418	802	678	415	389	503	487
1623	Zkscan2	-0.619971	0.312418	165	132	133	97	99	99
1624	Phf21b	0.540765	0.312418	164	196	271	253	391	326
1625	Scrt2	-4.52695	0.312852	5	1	3	0	0	0
1626	Sfrp4	0.486634	0.313786	801	1458	1368	1560	2372	1424
1627	Fuz	0.418744	0.313786	579	652	531	686	887	940
1628	Spic	2.34391	0.313786	2	1	2	12	8	8
1629	Vmn2r73	-1.02113	0.315421	79	56	57	16	37	55
1630	Them6	-0.329474	0.315421	2615	3336	2513	2026	2992	2176
1631	Cc2d2a	-0.383728	0.31576	1003	866	689	725	744	596
1632	Gas2l3	0.496164	0.317476	399	440	287	585	529	546
1633	Atf4	0.344174	0.317611	5332	5485	4700	6059	7443	7440
1634	Olfr1061	4.71153	0.318043	0	0	0	3	9	0
1635	Dbr1	0.485311	0.318466	225	244	291	350	397	378
1636	Olfr107	-0.481561	0.319558	1019	1226	883	910	694	763
1637	Bst2	1.60643	0.320096	3	15	7	29	37	13
1638	Esd	0.609983	0.320178	264	631	624	709	896	716
1639	Slc4a5	0.882097	0.322345	40	39	27	80	59	67
1640	Cep89	-0.476088	0.323373	648	372	422	319	390	363
1641	Lias	-0.434058	0.323373	520	540	410	348	489	327
1642	Slc2a4	0.408208	0.323373	448	538	435	499	875	669
1643	Kctd17	-0.378582	0.32349	949	1025	891	711	883	750
1644	Tspyl5	-0.397092	0.325131	1133	1238	981	960	1001	748
1645	Anks1	-0.357297	0.325131	2058	1613	1722	1275	1758	1447
1646	Rhag	0.893481	0.325398	95	253	147	456	326	196
1647	4930512J16Rik	-4.50324	0.325775	3	2	3	0	0	0
1648	Mast4	-0.341783	0.325839	2637	2558	2009	1925	2150	1920
1649	Muc5ac	-0.326482	0.326349	3276	5574	2158	2381	5906	1691
1650	Coq10b	0.502857	0.32768	443	624	363	452	855	887
1651	Cdc14a	-0.325868	0.330134	2938	3075	2452	2234	2718	2211
1652	Kalrn	-0.3537	0.330286	5377	5587	4278	4415	4381	3799
1653	9230112J17Rik	-0.941455	0.330439	54	69	41	21	37	33
1654	Gpr135	-2.39973	0.331535	2	18	12	0	3	4
1655	Olfr602-ps1	0.927797	0.331535	40	26	22	58	81	40
1656	St8sia1	-0.781321	0.332095	67	92	353	61	73	123
1657	Slitrk3	1.51423	0.332475	7	6	11	34	22	18
1658	Vmn2r20	0.573097	0.332545	181	67	190	282	134	243
1659	Plcxd3	-0.662946	0.332545	165	93	82	93	57	71
1660	Palm2	-0.345589	0.332637	1676	1459	1239	1222	1220	1182
1661	Map7d2	-0.441491	0.333289	447	481	410	337	369	338
1662	Gabbr2	-0.427443	0.333479	710	469	424	443	411	381
1663	Kcnq2	-0.55537	0.333479	224	191	207	153	128	169
1664	Ddx39	0.551426	0.333479	279	414	401	603	598	488
1665	Nme9	-1.08625	0.333837	49	47	36	11	37	23
1666	Zfp951	1.6083	0.333916	9	14	2	20	27	25
1667	Id2	0.323262	0.33417	5190	4211	5437	5836	6620	7188
1668	Hes6	0.647147	0.335064	138	70	97	160	192	142
1669	4930427A07Rik	0.461321	0.335647	696	476	347	629	812	705
1670	Ccdc170	-0.455125	0.335647	535	369	355	329	285	346
1671	Nrn1	0.579139	0.336087	121	146	94	158	228	185
1672	Ifi30	0.739169	0.338033	39	71	46	69	113	93
1673	Olfr1180	-1.19061	0.338241	53	16	48	17	17	15
1674	Lilra5	3.63537	0.340268	0	0	1	10	3	4
1675	Abhd12	-0.33236	0.340268	1525	1514	1484	1096	1432	1305
1676	Igf2bp2	0.450752	0.341105	384	415	321	518	555	543
1677	Acsl5	0.341772	0.341105	1930	1564	1692	1986	2388	2615
1678	Olfr1014	-1.57142	0.341145	29	43	59	37	13	6
1679	Olfr1117-ps1	-2.71759	0.341265	14	14	14	12	1	0
1680	Mcm6	0.392149	0.341923	616	696	518	813	1090	675
1681	Slc31a2	0.356876	0.341923	1466	1480	1674	1818	2572	1946
1682	Atp2b1	-0.345414	0.342492	7415	7749	6895	5671	6532	6222
1683	Kif6	-0.589943	0.3432	203	136	156	124	126	96
1684	Anxa4	0.327447	0.343417	2212	2654	2287	2781	3582	3179
1685	Rfx4	-0.653704	0.343417	139	160	108	99	93	80
1686	Olfr51	-1.55365	0.34361	24	52	15	11	6	12
1687	Rogdi	-0.437913	0.34375	401	412	383	282	359	300
1688	Lsamp	-0.705306	0.34375	144	129	141	114	104	59
1689	Napb	-0.429827	0.34375	584	497	401	412	437	315
1690	Pcdha10	-0.752778	0.344123	146	399	136	117	136	125
1691	Olfr518	-2.45164	0.344753	14	6	4	2	1	1
1692	Cplx3	-4.5144	0.34482	1	4	3	0	0	0
1693	Platr21	3.09083	0.344854	0	0	4	5	6	13
1694	Fam81a	-0.443676	0.344854	497	541	398	343	404	367
1695	E2f8	0.537522	0.344854	173	161	159	268	281	214
1696	Olfr1351	-1.63299	0.345399	9	12	34	2	4	15
1697	Ttc30b	-0.367016	0.345399	1414	1993	1577	1212	1664	1228
1698	Aff3	0.359055	0.346988	2669	3230	1852	3510	3822	2997
1699	Slc4a10	-0.630942	0.349294	136	187	180	116	113	113
1700	Lamtor4	0.615249	0.349574	116	79	104	129	183	174
1701	Gpatch11	-0.387962	0.349574	965	1088	774	687	839	752
1702	4930521E06Rik	4.64393	0.350047	0	0	0	5	0	5
1703	Mapk15	-0.421371	0.350205	663	580	556	375	601	470
1704	Tom1	-0.33804	0.350927	4568	5368	4101	3685	4295	3754
1705	A330009N23Rik	1.03815	0.351206	31	37	15	58	49	67
1706	Glcci1	-0.368645	0.351518	7393	8074	5280	6043	5936	4868
1707	Stxbp6	0.373972	0.351594	1277	952	1223	1540	1815	1381
1708	Adarb1	-0.366015	0.351645	1115	956	796	762	883	703
1709	Olfr1535	0.569791	0.351658	139	125	99	214	191	164
1710	Eps8l3	-4.56044	0.35232	6	4	0	0	0	0
1711	Iqsec3	-1.14063	0.352749	29	30	47	19	11	21
1712	Mog	-2.18541	0.354412	2	28	17	2	7	1
1713	5830416I19Rik	0.399615	0.355673	680	923	828	817	1166	1494
1714	Ttll11	-0.599708	0.355673	188	151	123	101	109	109
1715	5730420D15Rik	1.14468	0.355673	17	13	13	37	40	25
1716	Sf3a3	0.447042	0.355673	302	286	281	431	415	410
1717	Gm15910	0.666767	0.355905	92	69	58	138	97	131
1718	Hist1h2al	0.602924	0.356698	83	94	100	113	170	170
1719	Eef1d	0.394235	0.35749	608	606	584	623	960	973
1720	Abca4	-0.840155	0.357633	65	61	60	27	41	44
1721	Cfap46	-0.399986	0.358036	734	696	617	447	610	600
1722	Nxpe4	-0.606346	0.358036	167	229	216	145	128	151
1723	Scn9a	-0.471274	0.359599	21529	18037	12558	14852	11528	12739
1724	4932413F04Rik	4.61282	0.36099	0	0	0	4	0	6
1725	Rpsa	0.339508	0.361573	2066	2779	2503	2873	3621	3344
1726	Xpr1	-0.369387	0.361666	6855	7234	5304	5327	5159	5292
1727	Tex15	0.325249	0.361666	6287	3841	3814	6908	5858	5341
1728	Snx21	-0.47482	0.362106	427	320	430	242	367	294
1729	Trp53rka	0.49597	0.362417	213	251	214	322	356	335
1730	Nedd8	4.46478	0.362417	0	0	0	1	3	5
1731	Mppe1	-0.456275	0.362489	360	486	325	274	349	276
1732	Ubl3	-0.37882	0.362489	10204	11859	10040	7638	9533	9055
1733	Slc2a2	4.89225	0.362628	0	0	0	0	0	18
1734	Kcnh5	3.68725	0.362816	1	0	0	9	8	0
1735	Snhg18	0.372855	0.362816	707	793	955	888	1329	1177
1736	4930443O20Rik	-4.42454	0.362918	4	3	1	0	0	0
1737	Olfr1333	-1.51158	0.364444	10	39	15	2	14	9
1738	4430402I18Rik	-0.456394	0.365416	411	325	331	284	238	301
1739	Ocel1	1.13549	0.365416	12	16	16	32	32	39
1740	H2-Aa	0.359005	0.365416	721	1077	1050	991	1555	1337
1741	4930577N17Rik	2.10323	0.365416	4	0	7	14	9	17
1742	Sf3a2	0.54266	0.368388	161	133	158	262	221	215
1743	Phf13	0.368762	0.369417	717	635	675	859	898	1023
1744	Samd11	0.374716	0.369417	559	656	702	630	1125	944
1745	Ism2	1.03117	0.369909	13	22	20	23	49	52
1746	Hba-a2	0.78041	0.371419	676	1576	1032	2991	2102	1132
1747	Orai2	-0.373411	0.372072	957	1002	844	760	857	682
1748	Olfr538	-1.4325	0.372692	18	28	19	9	12	5
1749	Mc1r	0.686438	0.372971	448	1009	437	1136	843	1003
1750	Dusp14	-0.365016	0.374712	863	889	861	577	886	721
1751	Tnni3	1.83283	0.375085	6	3	3	10	22	15
1752	Car3	0.365763	0.375085	668	931	559	761	1557	747
1753	Dzip1l	-0.344768	0.375777	2514	3018	2402	2180	2464	1978
1754	Spef1	-0.362916	0.375777	1038	992	852	728	867	780
1755	Agpat3	-0.307196	0.375973	3875	3155	2772	2566	3167	2627
1756	Abhd3	-0.338482	0.376141	1153	1315	1187	866	1262	972
1757	Nrip3	-0.518506	0.376399	231	225	175	138	195	137
1758	B230208H11Rik	0.789463	0.376399	49	26	47	90	40	98
1759	Myt1l	-0.326328	0.376708	5223	4929	3937	3769	4103	3968
1760	Spdef	0.512587	0.377163	414	272	398	455	720	477
1761	Kcnk1	0.311481	0.377522	3378	2443	3289	3498	4073	4346
1762	Cep152	0.379175	0.377522	700	578	566	820	819	895
1763	Car15	-1.27029	0.377765	28	20	28	12	9	12
1764	Primpol	0.429064	0.377765	391	329	273	487	454	463
1765	Ociad2	0.36933	0.377765	708	648	628	788	947	993
1766	Best2	4.44709	0.377765	0	0	0	4	2	2
1767	Cel	4.44707	0.377854	0	0	0	4	2	2
1768	Zdhhc4	0.531514	0.378116	278	610	482	594	696	724
1769	Mdk	0.55389	0.378274	136	215	224	268	327	287
1770	Syt11	-0.342692	0.378852	6323	6607	5584	4796	5094	5584
1771	Olfr301	-1.08559	0.379798	33	44	32	20	25	11
1772	Mst1r	0.583379	0.38074	148	85	97	173	139	204
1773	Isg15	0.923434	0.38074	17	48	52	64	66	92
1774	Cnnm4	-0.355738	0.381153	1657	1596	1100	1207	1218	1128
1775	Ppp1r15a	0.359873	0.382164	1147	1175	875	1436	1449	1430
1776	Olfr1313	-1.18446	0.382164	33	50	33	12	13	33
1777	Clec2h	0.667798	0.382164	84	84	74	178	135	103
1778	Ccnjl	0.691775	0.382164	61	75	83	140	130	106
1779	Ryr1	-1.1229	0.382164	66	45	23	17	19	25
1780	P3h3	0.453855	0.382203	409	289	373	653	418	493
1781	Ebf4	-0.308156	0.384389	3223	2939	2572	2467	2776	2236
1782	Tmc7	-0.370484	0.384542	856	780	834	564	800	681
1783	Caskin1	-0.411818	0.384738	444	441	410	304	397	337
1784	Olfr892-ps1	1.85346	0.385378	1	11	3	16	33	6
1785	Cdc16	0.331299	0.386029	4126	4077	2941	4373	5461	4927
1786	Aurka	0.534021	0.386547	149	154	123	227	230	196
1787	Shh	1.29182	0.386735	32	11	151	52	187	135
1788	Ncdn	-0.357019	0.386788	1087	981	902	788	954	726
1789	Nrxn1	-0.378259	0.387331	6967	6422	4231	5024	4507	4541
1790	Foxm1	0.518074	0.387914	163	238	158	268	335	241
1791	Ccdc160	1.03294	0.387914	18	15	22	33	27	66
1792	Trhr	-1.6747	0.387914	18	24	16	11	3	6
1793	Esco2	0.463298	0.387914	391	656	370	671	781	570
1794	Peg3	-0.333588	0.387914	2424	2022	1759	1818	2076	1360
1795	F830045P16Rik	-4.43166	0.388561	7	0	3	0	0	0
1796	Ncapg	0.477489	0.388754	379	532	310	653	634	488
1797	Vpreb3	1.85308	0.388754	1	7	4	9	22	13
1798	Wdr7	-0.328557	0.389125	4096	4187	2618	3120	3271	2652
1799	Ppp3cc	-0.413107	0.389715	716	769	474	424	627	498
1800	Rubie	2.36182	0.389715	1	3	1	4	9	19
1801	Gm6654	-4.34562	0.389715	5	2	1	0	0	0
1802	Eno3	0.430042	0.389715	427	644	327	459	891	646
1803	Olfr366	0.647955	0.389715	82	74	55	140	103	106
1804	Sp9	-2.25543	0.390773	14	11	11	3	7	0
1805	Cass4	0.779479	0.390773	33	43	46	62	92	70
1806	Tnfrsf13c	1.31529	0.391146	11	7	10	31	21	22
1807	Gm21119	3.18656	0.391146	0	4	0	22	14	0
1808	Cryab	0.575431	0.391146	118	109	129	184	221	161
1809	Asb16	-4.32966	0.3915	5	1	2	0	0	0
1810	Ldha	0.349222	0.3915	2221	2844	3235	3328	3854	3939
1811	Mycn	0.937103	0.391755	26	18	44	46	65	61
1812	Olfr920	-0.702403	0.391797	98	106	90	72	53	67
1813	Nagpa	0.895044	0.395148	33	28	38	35	105	72
1814	Trim5	0.780234	0.395194	32	63	53	74	79	114
1815	Pomc	2.70409	0.395194	0	1	3	15	4	10
1816	Taar8c	1.18832	0.395194	5	22	14	18	53	27
1817	Vmn2r86	-1.55276	0.395194	26	18	13	5	6	9
1818	Rbl1	0.401099	0.396146	640	783	513	930	968	786
1819	Heatr6	-0.357133	0.396146	1331	973	960	834	972	871
1820	Olfr859	-0.527158	0.39685	1186	1339	941	1124	625	838
1821	Sema4d	-0.339397	0.39685	1729	1868	1616	1411	1733	1257
1822	Stk40	-0.34029	0.39685	1485	1329	1216	905	1294	1204
1823	Lrrc42	0.415975	0.39685	370	323	308	410	587	433
1824	Rgn	-0.874038	0.398165	35	69	57	20	45	30
1825	Olfr1359	0.49893	0.398165	236	237	180	292	321	363
1826	Mthfd2	0.390385	0.398227	486	433	514	628	676	685
1827	Vmn1r225	-2.70934	0.399725	11	6	6	1	0	3
1828	Krt71	-4.75842	0.399771	0	0	15	0	0	0
1829	Cdk1	0.436765	0.399875	369	521	371	595	708	503
1830	Olfr1472	-3.40546	0.400186	6	25	0	2	0	0
1831	Sgtb	-0.314771	0.400186	3116	2136	2192	2347	1893	2035
1832	Stub1	0.411794	0.400234	363	360	349	414	603	513
1833	Mtl5	1.92804	0.402149	2	7	2	13	15	13
1834	Wdr38	-0.76179	0.404197	102	61	48	58	39	32
1835	Ebpl	0.559559	0.405707	106	166	175	198	271	223
1836	Sacs	1.20134	0.406209	26	7	6	62	20	12
1837	Cacng5	-0.693995	0.406209	88	81	86	60	54	53
1838	Adgrb3	-0.596665	0.406209	120	138	134	66	120	96
1839	Olfr810	0.430486	0.406209	508	681	451	646	817	866
1840	Erbin	-0.429963	0.406209	15932	16205	12934	11140	11405	12818
1841	Ift172	-0.330509	0.406209	2506	2020	1793	1634	1866	1787
1842	Lsp1	0.461656	0.406209	207	339	303	343	485	403
1843	Mxd3	0.515218	0.406209	131	152	170	170	227	305
1844	Mfhas1	-0.36005	0.407795	1512	1486	1305	1360	1191	1021
1845	Olfr1250	0.708653	0.40852	66	151	76	165	170	145
1846	Med26	0.55852	0.409549	118	138	102	153	203	205
1847	Rps25	0.320078	0.40965	1742	1643	1850	1985	2588	2393
1848	Frrs1l	-1.31265	0.409784	33	23	42	17	20	6
1849	Slc30a2	-0.628808	0.409784	109	101	102	56	88	73
1850	4930407I10Rik	4.37915	0.409986	0	0	0	3	4	1
1851	Olfr1489	-0.45885	0.410495	444	300	317	361	211	252
1852	Maged1	0.332296	0.410528	2692	2250	2269	2421	3880	3480
1853	Rbm24	0.419959	0.41153	360	397	303	501	602	410
1854	Reep4	0.683835	0.413814	47	53	76	92	83	124
1855	Prr36	0.434047	0.41413	300	258	216	331	416	358
1856	Olfr1450	-1.51271	0.41413	32	24	12	23	5	3
1857	Apoa1	-3.26273	0.414366	7	5	4	2	0	0
1858	Sprr2f	4.48981	0.414366	0	0	0	5	0	4
1859	Vmn2r44	0.62713	0.414863	88	68	62	126	97	133
1860	Taldo1	0.362573	0.415631	761	952	988	1067	1302	1310
1861	Olfr1295	0.685991	0.415631	83	200	82	182	207	184
1862	Mak	-0.373894	0.415891	737	721	569	513	628	515
1863	Ccdc66	-0.408574	0.415891	507	581	529	397	482	416
1864	Ttf2	-0.432382	0.416975	325	366	340	234	298	282
1865	Gas2	-0.47056	0.417393	375	492	338	288	304	320
1866	Olfr1105	0.566953	0.417393	113	100	103	146	210	147
1867	Fez1	-0.82692	0.417393	78	34	77	39	31	37
1868	Ppard	-0.535767	0.4183	290	266	263	146	322	167
1869	Olfr1217	-0.494507	0.4183	414	434	239	222	301	277
1870	Fam171b	-0.364709	0.419654	1459	1088	817	939	904	856
1871	Uap1	0.339831	0.419654	2078	1635	1838	1922	2761	2844
1872	Fam135a	-0.356517	0.419654	8548	8541	5451	5911	6564	5834
1873	Psmd13	0.375878	0.419654	1788	1481	1156	1575	2329	2177
1874	Zmynd10	-0.492888	0.419654	278	256	213	161	210	192
1875	Nkain3	1.15281	0.421127	22	22	6	43	33	32
1876	Zap70	1.44812	0.421127	3	10	10	16	25	23
1877	Bex2	1.47121	0.421127	3	16	5	13	32	19
1878	D030025E07Rik	4.42468	0.421127	0	0	0	0	4	6
1879	Olfr251	0.57017	0.421127	198	74	95	201	166	167
1880	Tnfrsf25	0.737874	0.421127	47	37	47	60	88	86
1881	Serpine2	-0.336246	0.421127	4530	6147	5213	3936	5391	4060
1882	E130018N17Rik	2.058	0.421127	3	10	1	17	12	23
1883	Dab1	-0.701596	0.421422	88	97	97	48	101	46
1884	Treml4	-2.56967	0.421422	7	9	10	1	5	0
1885	Olfr552	-0.469605	0.421422	1077	1082	1018	1141	703	666
1886	Clca1	-2.70431	0.421836	9	18	2	0	2	2
1887	Shisa3	-0.700925	0.422561	82	79	104	53	69	51
1888	Pdzd2	-0.318667	0.422627	2755	2170	1922	2029	1897	1836
1889	Gstt1	0.7894	0.423629	35	49	35	78	80	60
1890	Cfap61	-0.386368	0.423635	746	743	516	561	579	471
1891	Olfr575	-1.12365	0.424482	23	39	28	7	27	14
1892	8030442B05Rik	-2.86305	0.425098	6	5	4	1	1	0
1893	Pgm3	0.431533	0.425371	388	567	364	532	682	649
1894	Sun3	-2.66558	0.425437	5	6	10	0	3	1
1895	3110009E18Rik	3.29375	0.426773	0	0	4	15	7	6
1896	Stard5	0.346402	0.427589	718	812	753	841	1188	1078
1897	3830417A13Rik	-4.48733	0.427878	0	9	1	0	0	0
1898	Bub1	0.466167	0.427921	239	379	284	412	498	398
1899	Rasal2	-0.327475	0.4287	5786	5093	3508	4645	3984	3372
1900	Gpr15	-4.36072	0.428738	6	3	0	0	0	0
1901	Napsa	1.16625	0.428738	12	33	15	56	39	40
1902	Vmn1r43	-4.36052	0.428857	6	3	0	0	0	0
1903	Sdc1	0.312895	0.428857	1587	2159	2288	1986	3074	2941
1904	Mdh1b	-0.75524	0.4293	141	105	75	54	53	96
1905	Olfr477	-0.557344	0.4293	227	291	145	147	168	147
1906	Hn1l	0.346288	0.4293	819	778	735	953	1253	961
1907	Tbc1d7	0.618437	0.4293	482	389	170	417	571	599
1908	Zbed5	0.32039	0.4293	1360	1423	1221	1606	2190	1560
1909	Vmn2r40	1.27777	0.429514	118	0	78	124	49	108
1910	Olfr968	0.569389	0.43172	129	151	126	256	209	179
1911	Ulk2	-0.325084	0.432004	2909	2759	1932	2224	2208	1917
1912	Wdfy3	-0.32643	0.432827	8853	7437	6359	6974	6441	5640
1913	4930558J18Rik	1.43899	0.432827	7	8	8	36	14	21
1914	Msx1os	-0.887087	0.432827	73	54	115	23	79	46
1915	AU015836	4.39244	0.432827	0	0	0	0	9	2
1916	Gm15698	4.44324	0.432827	0	0	0	5	4	0
1917	Mypn	-2.47162	0.432827	3	1	48	0	2	4
1918	Ube2e1	-0.417186	0.432869	422	500	398	295	374	382
1919	Sf3b4	-0.43119	0.432869	617	345	329	323	342	310
1920	Gm9268	4.44298	0.432869	0	0	0	5	4	0
1921	Serpinb1a	0.521072	0.433261	338	845	528	638	832	1004
1922	Haao	3.52338	0.433846	0	0	1	9	6	2
1923	Gm11201	-3.13079	0.433985	9	4	9	4	0	0
1924	LOC105245869	2.57898	0.434262	1	6	0	16	10	6
1925	Trim10	1.00451	0.435005	32	76	71	193	146	64
1926	Chrnb4	1.14104	0.435005	9	24	9	28	52	18
1927	A230009B12Rik	-1.61927	0.435301	23	23	6	7	5	4
1928	1700037H04Rik	0.697971	0.435325	42	54	52	74	105	78
1929	Rabl2	-0.400851	0.435431	502	512	449	337	482	368
1930	4930579H20Rik	4.42223	0.435526	0	0	0	4	5	0
1931	Klra9	4.42214	0.435599	0	0	0	4	5	0
1932	Olfr24	0.488023	0.436261	334	247	158	296	464	315
1933	Frs3	-1.16866	0.436478	31	36	20	12	13	15
1934	Zscan18	-0.596051	0.437705	94	148	123	55	123	87
1935	Rell2	-0.907026	0.437705	43	52	43	20	42	20
1936	1700025F24Rik	-4.27189	0.437705	2	4	1	0	0	0
1937	2410004P03Rik	-0.554934	0.437705	172	153	190	116	147	110
1938	Cln8	-0.340139	0.438539	1172	1062	958	869	963	838
1939	S1pr5	2.26454	0.43904	3	0	3	9	7	11
1940	Atp2c2	-0.424663	0.43904	499	373	379	284	323	379
1941	Olfr110	0.597611	0.439844	60	112	87	95	217	118
1942	Slc2a7	-4.30254	0.440045	6	0	3	0	0	0
1943	Gypa	0.814046	0.440045	283	817	610	1397	1168	610
1944	Hmgb3	0.356929	0.440665	905	783	599	928	1150	999
1945	Mup21	1.74745	0.441591	3	1	14	9	16	26
1946	Olfr1382	0.501123	0.44291	197	189	133	243	270	257
1947	Sema4g	-0.338118	0.443053	1200	1394	1283	953	1427	931
1948	Alas2	0.625347	0.443183	425	671	546	1306	961	557
1949	Olfr543	1.26936	0.443552	9	11	10	10	47	32
1950	Myo1f	0.756661	0.443813	35	131	61	112	160	98
1951	Arhgap11a	0.405991	0.443835	435	358	219	560	491	345
1952	Adprhl1	4.26775	0.444182	0	0	0	1	5	2
1953	Polr1e	0.512931	0.444182	174	238	282	322	383	332
1954	Hnrnpab	0.332531	0.444542	3424	4167	3422	4854	5952	4028
1955	Mageb16	2.78605	0.445551	1	4	0	17	5	10
1956	Ctps	0.346811	0.445591	700	697	687	768	1053	1017
1957	Pmp22	0.39458	0.445591	619	673	821	627	906	1624
1958	Emp2	0.314037	0.445591	1313	1400	1272	1514	2011	1761
1959	Peg13	-0.308001	0.445591	2420	2251	1962	1674	2218	1810
1960	Rs1	1.16049	0.445591	29	11	7	42	21	38
1961	Olfr1322	-0.981397	0.445591	47	21	60	21	19	24
1962	Samd7	4.27288	0.44572	0	0	0	3	2	2
1963	S1pr2	0.360837	0.44572	726	613	588	768	1096	785
1964	Lrrc4c	0.389825	0.44572	381	347	297	437	552	437
1965	Adcy8	-0.853504	0.446013	57	35	70	32	27	33
1966	Rpl27a	0.296788	0.446013	2782	3026	2983	2820	4278	4602
1967	Hils1	-4.37865	0.446013	2	7	0	0	0	0
1968	Nasp	0.324574	0.446285	1325	1251	1103	1381	1821	1704
1969	Papolb	4.37412	0.447694	0	0	0	2	8	0
1970	4931420L22Rik	1.73766	0.448233	4	6	3	12	11	27
1971	Nlrp4f	1.26793	0.448712	26	7	8	26	24	44
1972	D16Ertd472e	0.375639	0.449152	1210	1322	751	1473	1519	1403
1973	Hdac11	-0.403953	0.449175	519	563	534	420	487	393
1974	Klk7	-3.63938	0.449175	1	13	6	1	0	0
1975	Vmn1r229	3.44904	0.450419	1	0	0	4	2	8
1976	Neurl1b	0.437122	0.45079	280	295	227	396	390	360
1977	Dcst1	-0.980594	0.45079	46	47	22	27	24	11
1978	Zfp541	3.43978	0.451254	0	1	0	3	3	10
1979	Tnr	-1.7112	0.452211	18	15	9	5	3	5
1980	Pola2	0.399193	0.452211	405	366	276	462	597	406
1981	A330033J07Rik	-1.84379	0.452211	12	19	15	0	8	10
1982	Cep250	-0.329885	0.452211	2095	1829	1831	1514	1461	1904
1983	Lipo1	-0.592845	0.452211	77	163	266	69	120	148
1984	Hmgcs1	0.344416	0.452211	4717	6698	4661	6374	8008	7044
1985	Klhl25	-0.410027	0.453767	401	363	423	291	345	312
1986	Folr1	0.638862	0.454318	73	235	138	181	257	240
1987	Gatc	-0.322777	0.454807	1437	1321	979	995	1151	991
1988	Olfr139	-1.24024	0.455044	28	49	20	11	11	20
1989	Ablim2	-0.464714	0.455044	323	266	232	182	246	202
1990	Rbpms2	0.666901	0.455232	46	77	69	100	130	92
1991	Olfr1449	-3.357	0.45527	6	11	10	5	0	0
1992	Ccdc64	-0.400415	0.45527	460	486	465	349	418	370
1993	Moxd1	0.359825	0.45573	531	659	639	676	940	889
1994	Clvs2	-3.13899	0.456895	9	11	6	6	0	0
1995	Ahcyl1	-0.323196	0.457698	8119	8177	6306	6044	6878	6136
1996	Zfp781	-1.78953	0.460586	27	32	30	29	13	0
1997	Armc4	-0.398564	0.460771	457	459	465	284	420	425
1998	Gm805	0.853354	0.460771	51	17	22	68	42	49
[truncated: 22,663 more rows]
