# Supplementary material for: Olfactory receptor accessory proteins play crucial roles in receptor function and gene choice
Source: eLife journal article supplement (doi:10.7554/elife.21895), 2017-03-06
Supplement: supp [file elife_poa_e21895_Supplementary_table_2.xlsx]

## Sheet: oOR
Supplementary table 2
	id	Class	DV	Chr
210	Olfr1396	II	Ventral	chr11
235	Olfr1370	II	Ventral	chr13
240	Olfr959	II	Dorsal	chr9
303	Olfr799	II	Ventral	chr10
305	Olfr800	II	Ventral	chr10
329	Olfr145	II	Dorsal	chr9
340	Olfr1297	II	Ventral	chr2
349	Olfr220	II	Ventral	chr1
385	Olfr729	II	Ventral	chr14
400	Olfr56	II	Ventral	chr11
402	Olfr544	I	Dorsal	chr7
411	Olfr370	II	Ventral	chr8
430	Olfr479	II	Ventral	chr7
432	Olfr204	II	Ventral	chr16
434	Olfr557	I	Dorsal	chr7
452	Olfr790	II	Ventral	chr10
467	Olfr194	II	Ventral	chr16
476	Olfr290	II	Ventral	chr7
499	Olfr129	II	Ventral	chr17
514	Olfr743	II	Ventral	chr14
516	Olfr1110	II	Ventral	chr2
519	Olfr653	I	Dorsal	chr7
531	Olfr111	II	Ventral	chr17
537	Olfr1448	II	Dorsal	chr19
569	Olfr1056	II	Dorsal	chr2
572	Olfr571	I	Dorsal	chr7
573	Olfr1509	II	Ventral	chr14
601	Olfr558	I	Dorsal	chr7
616	Olfr65	I	Dorsal	chr7
628	Olfr168	II	Ventral	chr16
632	Olfr447	II	Dorsal	chr6
639	Olfr1209	II	Ventral	chr2
646	Olfr794	II	Ventral	chr10
654	Olfr1395	II	Ventral	chr11
673	Olfr1508	II	Ventral	chr14
692	Olfr1079	II	Dorsal	chr2
699	Olfr748	II	Dorsal	chr14
701	Olfr1386	II	Ventral	chr11
707	Olfr339	II	Ventral	chr2
711	Olfr1197	II	Ventral	chr2
723	Olfr1303	II	Ventral	chr2
732	Olfr727	II	Ventral	chr14
735	Olfr131	II	Ventral	chr17
736	Olfr1057	II	Dorsal	chr2
746	Olfr169	II	Ventral	chr16
748	Olfr1107	II	Ventral	chr2
763	Olfr119	II	Ventral	chr17
766	Olfr1195	II	Ventral	chr2
767	Olfr1193	II	Ventral	chr2
771	Olfr173	II	Ventral	chr16
778	Olfr449	II	Ventral	chr6
781	Olfr286	II	Ventral	chr15
785	Olfr970	II	Dorsal	chr9
810	Olfr101	II	Ventral	chr17
815	Olfr715	II	Ventral	chr7
825	Olfr351	II	Dorsal	chr2
860	Olfr365	II	Ventral	chr2
882	Olfr203	II	Ventral	chr16
883	Olfr291	II	Ventral	chr7
893	Olfr432	II	Dorsal	chr1
905	Olfr403	II	Ventral	chr11
912	Olfr644	I	Dorsal	chr7
920	Olfr20	II	Dorsal	chr11
934	Olfr353	II	Ventral	chr2
941	Olfr577	I	Dorsal	chr7
980	Olfr1239	II	Ventral	chr2
995	Olfr218	II	Dorsal	chr1
1045	Olfr1289	II	Ventral	chr2
1056	Olfr527	II	Ventral	chr7
1084	Olfr78	I	Dorsal	chr7
1105	Olfr73	II	Dorsal	chr2
1130	Olfr33	I	Dorsal	chr7
1142	Olfr812	II	Dorsal	chr10
1161	Olfr769	II	Ventral	chr10
1168	Olfr1347	II	Ventral	chr7
1177	Olfr16	II	Dorsal	chr1
1179	Olfr987	II	Dorsal	chr2
1198	Olfr1318	II	Ventral	chr2
1237	Olfr611	I	Dorsal	chr7
1243	Olfr632	I	Dorsal	chr7
1245	Olfr1404	II	Dorsal	chr1
1256	Olfr166	II	Ventral	chr16
1257	Olfr143	II	Dorsal	chr9
1259	Olfr740	II	Ventral	chr14
1276	Olfr781	II	Ventral	chr10
1293	Olfr666	I	Dorsal	chr7
1298	Olfr1391	II	Ventral	chr11
1307	Olfr1288	II	Ventral	chr2
1321	Olfr1348	II	Ventral	chr7
1325	Olfr612	I	Dorsal	chr7
1357	Olfr414	II	Ventral	chr1
1386	Olfr15	II	Ventral	chr16
1398	Olfr578	I	Dorsal	chr7
1406	Olfr340	II	Ventral	chr2
1420	Olfr798	II	Dorsal	chr10
1428	Olfr205	II	Ventral	chr16
1433	Olfr102	II	Dorsal	chr17
1435	Olfr1168	II	Dorsal	chr2
1444	Olfr806	II	Ventral	chr10
1451	Olfr642	I	Dorsal	chr7
1455	Olfr1505	II	Dorsal	chr19
1459	Olfr64	I	Dorsal	chr7
1462	Olfr214	II	Ventral	chr6
1467	Olfr1226	II	Ventral	chr2
1472	Olfr1442	II	Ventral	chr19
1513	Olfr873	II	Ventral	chr9
1541	Olfr1387	II	Ventral	chr11
1550	Olfr733	II	Ventral	chr14
1584	Olfr620	I	Dorsal	chr7
1592	Olfr901	II	Ventral	chr9
1599	Olfr679	I	Dorsal	chr7
1620	Olfr995	II	Dorsal	chr2
1634	Olfr1061	II	Ventral	chr2
1709	Olfr1535	II	Ventral	chr13

## Sheet: uOR
Supplementary table 2
	id	Class	DV	Chr
5	Olfr1046	II	Dorsal	chr2
7	Olfr693	II	Ventral	chr7
8	Olfr533	II	Ventral	chr7
9	Olfr124	II	Ventral	chr17
10	Olfr1162	II	Dorsal	chr2
11	Olfr923	II	Dorsal	chr9
12	Olfr819	II	Dorsal	chr10
13	Olfr706	II	Ventral	chr7
16	Olfr652	I	Dorsal	chr7
17	Olfr59	II	Ventral	chr11
18	Olfr592	I	Dorsal	chr7
19	Olfr68	I	Dorsal	chr7
20	Olfr884	II	Dorsal	chr9
22	Olfr1006	II	Ventral	chr2
24	Olfr1463	II	Ventral	chr19
25	Olfr665	I	Dorsal	chr7
26	Olfr878	II	Dorsal	chr9
27	Olfr531	II	Ventral	chr7
28	Olfr1461	II	Ventral	chr19
29	Olfr522	II	Dorsal	chr7
30	Olfr867	II	Dorsal	chr9
31	Olfr6	II	Ventral	chr7
32	Olfr332	II	Ventral	chr11
33	Olfr705	II	Ventral	chr7
34	Olfr1443	II	Ventral	chr19
35	Olfr281	II	Ventral	chr15
37	Olfr1225	II	Ventral	chr2
38	Olfr532	II	Ventral	chr7
39	Olfr1253	II	Ventral	chr2
40	Olfr309	II	Ventral	chr7
41	Olfr541	II	Ventral	chr7
43	Olfr1408	II	Dorsal	chr1
45	Olfr787	II	Ventral	chr10
46	Olfr683	I	Dorsal	chr7
47	Olfr506	II	Dorsal	chr7
48	Olfr1389	II	Dorsal	chr11
49	Olfr788	II	Ventral	chr10
50	Olfr1228	II	Ventral	chr2
51	Olfr1325	II	Ventral	chrX
53	Olfr598	I	Dorsal	chr7
54	Olfr523	II	Ventral	chr7
55	Olfr741	II	Ventral	chr14
58	Olfr536	II	Ventral	chr7
59	Olfr69	I	Dorsal	chr7
61	Olfr1015	II	Ventral	chr2
62	Olfr1154	II	Dorsal	chr2
63	Olfr1264	II	Ventral	chr2
65	Olfr610	I	Dorsal	chr7
66	Olfr689	I	Dorsal	chr7
68	Olfr868	II	Ventral	chr9
69	Olfr535	II	Ventral	chr7
70	Olfr146	II	Dorsal	chr9
71	Olfr921	II	Ventral	chr9
73	Olfr1097	II	Ventral	chr2
74	Olfr695	II	Ventral	chr7
75	Olfr1140	II	Dorsal	chr2
76	Olfr601	I	Dorsal	chr7
77	Olfr1240	II	Ventral	chr2
79	Olfr1047	II	Dorsal	chr2
80	Olfr1437	II	Ventral	chr19
81	Olfr1093	II	Ventral	chr2
82	Olfr1030	II	Dorsal	chr2
84	Olfr93	II	Ventral	chr17
85	Olfr622	I	Dorsal	chr7
86	Olfr961	II	Dorsal	chr9
87	Olfr1099	II	Ventral	chr2
88	Olfr618	I	Dorsal	chr7
89	Olfr937	II	Dorsal	chr9
91	Olfr389	II	Ventral	chr11
93	Olfr1018	II	Ventral	chr2
94	Olfr694	II	Ventral	chr7
95	Olfr1366	II	Dorsal	chr13
96	Olfr1495	II	Dorsal	chr19
97	Olfr584	I	Dorsal	chr7
98	Olfr455	I	Ventral	chr6
99	Olfr12	II	Ventral	chr1
101	Olfr910	II	Ventral	chr9
102	Olfr1412	II	Ventral	chr1
104	Olfr1427	II	Ventral	chr19
105	Olfr224	II	Ventral	chr11
106	Olfr231	II	Dorsal	chr1
107	Olfr1036	II	Dorsal	chr2
108	Olfr1426	II	Ventral	chr19
109	Olfr211	II	Ventral	chr6
110	Olfr17	II	Ventral	chr7
115	Olfr1222	II	Ventral	chr2
116	Olfr958	II	Dorsal	chr9
117	Olfr764	#N/A	#N/A	chr14
118	Olfr813	II	Dorsal	chr10
119	Olfr390	II	Ventral	chr11
121	Olfr250	II	Dorsal	chr9
122	Olfr1260	II	Ventral	chr2
123	Olfr1044	II	Dorsal	chr2
124	Olfr147	II	Dorsal	chr9
126	Olfr19	II	Dorsal	chr16
127	Olfr452	II	Ventral	chr6
129	Olfr1263	II	Ventral	chr2
132	Olfr1252	II	Ventral	chr2
133	Olfr1129	II	Ventral	chr2
135	Olfr1176	II	Dorsal	chr2
136	Olfr394	II	Ventral	chr11
137	Olfr358	II	Dorsal	chr2
138	Olfr235	II	Ventral	chr19
139	Olfr60	II	Ventral	chr7
141	Olfr1211	II	Ventral	chr2
142	Olfr132	II	Ventral	chr17
143	Olfr1340	II	Dorsal	chr4
146	Olfr1454	II	Ventral	chr19
147	Olfr32	II	Ventral	chr2
150	Olfr1262	II	Ventral	chr2
151	Olfr167	II	Ventral	chr16
152	Olfr1255	II	Ventral	chr2
154	Olfr437	II	Dorsal	chr6
155	Olfr1302	II	Ventral	chr2
156	Olfr1258	II	Ventral	chr2
158	Olfr1065	II	Dorsal	chr2
160	Olfr1349	II	Ventral	chr7
161	Olfr569	I	Dorsal	chr7
162	Olfr1212	II	Ventral	chr2
163	Olfr136	II	Ventral	chr17
164	Olfr303	II	Ventral	chr7
165	Olfr1440	II	Ventral	chr19
166	Olfr668	I	Dorsal	chr7
167	Olfr1246	II	Ventral	chr2
171	Olfr957	II	Dorsal	chr9
172	Olfr716	II	Ventral	chr7
173	Olfr1406	II	Dorsal	chr1
174	Olfr1155	II	Dorsal	chr2
175	Olfr1043	II	Dorsal	chr2
177	Olfr1229	II	Ventral	chr2
178	Olfr181	II	Ventral	chr16
179	Olfr827	II	Ventral	chr10
180	Olfr1392	II	Ventral	chr11
181	Olfr448	II	Dorsal	chr6
182	Olfr881	II	Dorsal	chr9
183	Olfr597	I	Dorsal	chr7
184	Olfr430	II	Dorsal	chr1
186	Olfr1206	II	Ventral	chr2
187	Olfr190	II	Ventral	chr16
188	Olfr54	II	Dorsal	chr11
190	Olfr670	I	Dorsal	chr7
191	Olfr524	II	Ventral	chr7
192	Olfr142	II	Ventral	chr2
193	Olfr1170	II	Dorsal	chr2
194	Olfr1143	II	Ventral	chr2
195	Olfr675	I	Dorsal	chr7
196	Olfr870	II	Ventral	chr9
197	Olfr1323	II	Ventral	chrX
199	Olfr411	II	Dorsal	chr11
200	Olfr1259	II	Ventral	chr2
201	Olfr965	II	Dorsal	chr9
202	Olfr1324	II	Ventral	chrX
203	Olfr1123	II	Ventral	chr2
204	Olfr847	II	Dorsal	chr9
207	Olfr1045	II	Dorsal	chr2
208	Olfr948	II	Ventral	chr9
209	Olfr849	II	Ventral	chr9
211	Olfr1290	II	Ventral	chr2
214	Olfr974	II	Ventral	chr9
215	Olfr1491	II	Ventral	chr19
216	Olfr502	II	Ventral	chr7
218	Olfr125	II	Ventral	chr17
219	Olfr392	II	Ventral	chr11
221	Olfr1104	II	Dorsal	chr2
222	Olfr801	II	Ventral	chr10
224	Olfr745	II	Dorsal	chr14
226	Olfr824	II	Ventral	chr10
227	Olfr62	II	Dorsal	chr4
228	Olfr1352	II	Ventral	chr10
231	Olfr195	II	Ventral	chr16
232	Olfr720	II	Ventral	chr14
233	Olfr1196	II	Ventral	chr2
238	Olfr596	II	Dorsal	chr7
239	Olfr228	II	Dorsal	chr2
241	Olfr1393	II	Ventral	chr11
244	Olfr48	II	Ventral	chr2
245	Olfr1477	II	Ventral	chr19
249	Olfr1447	II	Ventral	chr19
250	Olfr786	II	Ventral	chr10
254	Olfr308	II	Ventral	chr7
255	Olfr141	II	Dorsal	chr2
256	Olfr1029	II	Dorsal	chr2
257	Olfr1157	II	Dorsal	chr2
258	Olfr912	II	Ventral	chr9
259	Olfr1148	II	Ventral	chr2
261	Olfr553	I	Dorsal	chr7
262	Olfr791	II	Dorsal	chr10
265	Olfr843	II	Ventral	chr9
266	Olfr1242	II	Ventral	chr2
267	Olfr633	I	Dorsal	chr7
270	Olfr116	II	Ventral	chr17
273	Olfr179	#N/A	#N/A	chr11
274	Olfr835	II	Ventral	chr9
275	Olfr792	II	Dorsal	chr10
276	Olfr2	II	Ventral	chr7
279	Olfr1202	II	Ventral	chr2
282	Olfr845	II	Ventral	chr9
283	Olfr594	I	Dorsal	chr7
284	Olfr924	II	Dorsal	chr9
285	Olfr46	II	Ventral	chr7
286	Olfr263	II	Ventral	chr13
287	Olfr1316	II	Ventral	chr2
288	Olfr272	II	Ventral	chr4
289	Olfr376	II	Dorsal	chr11
290	Olfr629	I	Dorsal	chr7
291	Olfr826	II	Dorsal	chr10
292	Olfr586	I	Dorsal	chr7
294	Olfr77	II	Dorsal	chr9
296	Olfr525	II	Ventral	chr7
298	Olfr1034	II	Dorsal	chr2
299	Olfr1364	II	Ventral	chr13
301	Olfr1510	II	Dorsal	chr14
302	Olfr1205	II	Ventral	chr2
308	Olfr66	I	Dorsal	chr7
309	Olfr749	II	Dorsal	chr14
310	Olfr677	I	Dorsal	chr7
313	Olfr488	II	Dorsal	chr7
316	Olfr692	I	Dorsal	chr7
318	Olfr424	II	Dorsal	chr1
319	Olfr1414	II	Ventral	chr1
320	Olfr657	I	Dorsal	chr7
322	Olfr919	II	Dorsal	chr9
323	Olfr681	I	Dorsal	chr7
324	Olfr582	I	Dorsal	chr7
325	Olfr1241	II	Ventral	chr2
326	Olfr1178	II	Ventral	chr2
330	Olfr1511	II	Dorsal	chr14
331	Olfr67	I	Dorsal	chr7
333	Olfr1500	II	Dorsal	chr19
334	Olfr1344	II	Ventral	chr7
335	Olfr726	II	Ventral	chr14
337	Olfr1182	II	Ventral	chr2
338	Olfr703	II	Ventral	chr7
345	Olfr887	II	Ventral	chr9
348	Olfr1200	II	Ventral	chr2
351	Olfr809	II	Dorsal	chr10
352	Olfr943	II	Ventral	chr9
353	Olfr273	II	Ventral	chr4
355	Olfr1354	II	Ventral	chr10
356	Olfr698	II	Ventral	chr7
358	Olfr1039	II	Dorsal	chr2
359	Olfr1042	II	Dorsal	chr2
360	Olfr155	II	Ventral	chr4
361	Olfr45	II	Ventral	chr7
362	Olfr1294	II	Ventral	chr2
366	Olfr467	II	Dorsal	chr7
369	Olfr1444	II	Dorsal	chr19
370	Olfr1009	II	Dorsal	chr2
372	Olfr1417	II	Ventral	chr19
375	Olfr1490	II	Ventral	chr19
376	Olfr1513	II	Dorsal	chr14
377	Olfr994	II	Dorsal	chr2
378	Olfr1256	II	Ventral	chr2
380	Olfr285	II	Ventral	chr15
382	Olfr11	II	Ventral	chr13
387	Olfr772	II	Ventral	chr10
389	Olfr658	I	Dorsal	chr7
391	Olfr1002	II	Dorsal	chr2
392	Olfr357	II	Ventral	chr2
393	Olfr297	II	Ventral	chr7
394	Olfr671	I	Dorsal	chr7
398	Olfr1135	II	Ventral	chr2
403	Olfr460	II	Ventral	chr6
407	Olfr1090	II	Ventral	chr2
408	Olfr985	II	Dorsal	chr9
409	Olfr851	II	Ventral	chr9
410	Olfr1085	II	Ventral	chr2
413	Olfr55	II	Ventral	chr17
414	Olfr1161	II	Dorsal	chr2
415	Olfr1052	II	Dorsal	chr2
417	Olfr599	I	Dorsal	chr7
421	Olfr8	II	Ventral	chr10
423	Olfr1428	II	Ventral	chr19
425	Olfr1431	II	Ventral	chr19
426	Olfr1361	II	Dorsal	chr13
428	Olfr23	II	Dorsal	chr11
433	Olfr1238	II	Ventral	chr2
436	Olfr183	II	Ventral	chr16
438	Olfr298	II	Ventral	chr7
444	Olfr267	II	Ventral	chr4
445	Olfr1356	II	Ventral	chr10
446	Olfr138	II	Ventral	chr17
447	Olfr317	II	Dorsal	chr11
451	Olfr684	I	Dorsal	chr7
456	Olfr311	II	Ventral	chr11
460	Olfr305	II	Ventral	chr7
466	Olfr1320	II	Ventral	chrX
468	Olfr1137	II	Dorsal	chr2
469	Olfr30	II	Dorsal	chr11
471	Olfr318	II	Ventral	chr11
472	Olfr918	II	Dorsal	chr9
474	Olfr99	II	Ventral	chr17
477	Olfr1311	II	Ventral	chr2
478	Olfr1380	II	Ventral	chr11
480	Olfr95	II	Ventral	chr17
481	Olfr1254	II	Ventral	chr2
483	Olfr487	II	Ventral	chr7
487	Olfr198	II	Ventral	chr16
490	Olfr556	I	Ventral	chr7
493	Olfr346	II	Ventral	chr2
494	Olfr122	II	Ventral	chr17
495	Olfr969	II	Dorsal	chr9
496	Olfr836	II	Ventral	chr9
498	Olfr722	II	Ventral	chr14
502	Olfr1208	II	Ventral	chr2
504	Olfr725	II	Ventral	chr14
505	Olfr133	II	Dorsal	chr17
506	Olfr70	II	Ventral	chr4
507	Olfr704	II	Ventral	chr7
508	Olfr1102	II	Dorsal	chr2
511	Olfr44	II	Ventral	chr9
515	Olfr1133	II	Dorsal	chr2
517	Olfr1134	II	Dorsal	chr2
521	Olfr1037	II	Dorsal	chr2
522	Olfr1309	II	Ventral	chr2
523	Olfr1368	II	Ventral	chr13
524	Olfr1497	II	Dorsal	chr19
526	Olfr91	II	Ventral	chr17
529	Olfr222	II	Ventral	chr11
539	Olfr640	I	Dorsal	chr7
543	Olfr97	II	Ventral	chr17
547	Olfr127	II	Ventral	chr17
550	Olfr1048	II	Dorsal	chr2
552	Olfr1051	II	Dorsal	chr2
555	Olfr1471	II	Ventral	chr19
559	Olfr1234	II	Ventral	chr2
561	Olfr461	II	Ventral	chr6
562	Olfr570	I	Dorsal	chr7
564	Olfr417	II	Ventral	chr1
565	Olfr655	I	Dorsal	chr7
568	Olfr728	II	Ventral	chr14
570	Olfr516	II	Dorsal	chr7
571	Olfr818	II	Ventral	chr10
577	Olfr1384	II	Ventral	chr11
579	Olfr478	II	Dorsal	chr7
580	Olfr1160	II	Dorsal	chr2
581	Olfr239	II	Ventral	chr17
582	Olfr736	II	Ventral	chr14
583	Olfr742	II	Ventral	chr14
584	Olfr464	II	Ventral	chr11
589	Olfr646	I	Dorsal	chr7
591	Olfr410	II	Dorsal	chr11
594	Olfr466	II	Ventral	chr13
596	Olfr1424	II	Ventral	chr19
597	Olfr350	II	Dorsal	chr2
600	Olfr1031	II	Dorsal	chr2
602	Olfr630	I	Dorsal	chr7
603	Olfr606	I	Dorsal	chr7
604	Olfr178	II	Ventral	chr16
607	Olfr3	II	Dorsal	chr2
610	Olfr96	II	Ventral	chr17
623	Olfr199	II	Ventral	chr16
624	Olfr1494	II	Ventral	chr19
627	Olfr992	II	Dorsal	chr2
631	Olfr170	II	Ventral	chr16
634	Olfr1330	II	Ventral	chr4
635	Olfr608	I	Dorsal	chr7
637	Olfr1112	II	Ventral	chr2
641	Olfr976	II	Dorsal	chr9
642	Olfr938	II	Dorsal	chr9
645	Olfr314	II	Ventral	chr11
648	Olfr1152	II	Ventral	chr2
649	Olfr1339	II	Dorsal	chr4
652	Olfr744	II	Dorsal	chr14
656	Olfr768	II	Dorsal	chr10
658	Olfr1087	II	Ventral	chr2
661	Olfr319	II	Ventral	chr11
662	Olfr338	II	Dorsal	chr2
663	Olfr419	II	Dorsal	chr1
664	Olfr1261	II	Ventral	chr2
665	Olfr330	II	Ventral	chr11
669	Olfr215	II	Ventral	chr6
670	Olfr1484	II	Ventral	chr19
671	Olfr457	II	Ventral	chr6
672	Olfr348	II	Dorsal	chr2
678	Olfr1341	II	Ventral	chr4
680	Olfr869	II	Ventral	chr9
681	Olfr316	II	Ventral	chr11
682	Olfr1221	II	Ventral	chr2
685	Olfr462	II	Ventral	chr11
690	Olfr206	II	Ventral	chr16
694	Olfr967	II	Dorsal	chr9
695	Olfr623	I	Dorsal	chr7
704	Olfr112	II	Ventral	chr17
715	Olfr699	II	Ventral	chr7
719	Olfr1233	II	Ventral	chr2
721	Olfr463	II	Ventral	chr11
726	Olfr916	II	Dorsal	chr9
728	Olfr981	II	Dorsal	chr9
729	Olfr1446	II	Ventral	chr19
734	Olfr13	II	Ventral	chr6
743	Olfr1184	II	Ventral	chr2
745	Olfr986	II	Ventral	chr9
758	Olfr517	II	Dorsal	chr7
764	Olfr135	II	Ventral	chr17
769	Olfr434	II	Ventral	chr6
770	Olfr150	II	Dorsal	chr9
772	Olfr1215	II	Ventral	chr2
773	Olfr1098	II	Ventral	chr2
776	Olfr177	II	Ventral	chr16
779	Olfr922	II	Dorsal	chr9
784	Olfr807	II	Dorsal	chr10
788	Olfr279	II	Ventral	chr15
796	Olfr1410	II	Ventral	chr1
802	Olfr373	II	Dorsal	chr8
803	Olfr361	II	Ventral	chr2
806	Olfr1115	II	Ventral	chr2
811	Olfr686	I	Ventral	chr7
812	Olfr1198	II	Ventral	chr2
814	Olfr397	II	Ventral	chr11
816	Olfr1270	II	Ventral	chr2
817	Olfr605	I	Dorsal	chr7
822	Olfr1106	II	Dorsal	chr2
824	Olfr201	II	Ventral	chr16
828	Olfr796	II	Ventral	chr10
842	Olfr123	II	Ventral	chr17
844	Olfr933	II	Dorsal	chr9
856	Olfr1121	II	Ventral	chr2
859	Olfr18	II	Ventral	chr9
864	Olfr275	II	Ventral	chr4
865	Olfr325	II	Ventral	chr11
867	Olfr765	II	Dorsal	chr10
876	Olfr820	II	Ventral	chr10
878	Olfr894	II	Dorsal	chr9
888	Olfr354	II	Ventral	chr2
889	Olfr1308	II	Ventral	chr2
896	Olfr362	II	Ventral	chr2
908	Olfr399	II	Dorsal	chr11
917	Olfr1487	II	Ventral	chr19
921	Olfr1100	II	Ventral	chr2
924	Olfr360	II	Ventral	chr2
929	Olfr988	II	Dorsal	chr2
930	Olfr476	II	Ventral	chr7
935	Olfr825	II	Ventral	chr10
938	Olfr1342	II	Ventral	chr4
948	Olfr453	II	Dorsal	chr6
949	Olfr1321	II	Ventral	chrX
950	Olfr1338	II	Dorsal	chr4
952	Olfr1026	II	Dorsal	chr2
953	Olfr312	II	Ventral	chr11
955	Olfr38	II	Dorsal	chr6
960	Olfr676	I	Dorsal	chr7
964	Olfr815	II	Dorsal	chr10
966	Olfr130	II	Ventral	chr17
967	Olfr307	II	Ventral	chr7
969	Olfr47	II	Ventral	chr6
983	Olfr497	II	Ventral	chr7
984	Olfr39	II	Ventral	chr9
985	Olfr828	II	Ventral	chr9
990	Olfr566	I	Dorsal	chr7
1002	Olfr283	II	Ventral	chr15
1017	Olfr1032	II	Dorsal	chr2
1032	Olfr441	II	Dorsal	chr6
1033	Olfr1301	II	Ventral	chr2
1038	Olfr450	II	Ventral	chr6
1041	Olfr1111	II	Dorsal	chr2
1044	Olfr1183	II	Ventral	chr2
1053	Olfr1307	II	Ventral	chr2
1060	Olfr121	II	Ventral	chr17
1073	Olfr1350	II	Ventral	chr7
1074	Olfr148	II	Dorsal	chr9
1083	Olfr372	II	Dorsal	chr8
1090	Olfr714	II	Ventral	chr7
1101	Olfr1306	II	Ventral	chr2
1102	Olfr484	II	Dorsal	chr7
1118	Olfr982	II	Dorsal	chr9
1126	Olfr420	II	Dorsal	chr1
1127	Olfr221	II	Dorsal	chr14
1145	Olfr776	II	Ventral	chr10
1149	Olfr1305	II	Ventral	chr2
1153	Olfr324	II	Ventral	chr11
1167	Olfr459	II	Ventral	chr6
1170	Olfr521	II	Dorsal	chr7
1178	Olfr1474	II	Ventral	chr19
1188	Olfr872	II	Ventral	chr9
1205	Olfr137	II	Ventral	chr17
1210	Olfr483	II	Dorsal	chr7
1215	Olfr963	II	Dorsal	chr9
1216	Olfr491	II	Ventral	chr7
1221	Olfr149	II	Dorsal	chr9
1227	Olfr713	II	Ventral	chr7
1230	Olfr1251	II	Ventral	chr2
1246	Olfr1277	II	Ventral	chr2
1248	Olfr31	II	Ventral	chr14
1252	Olfr435	II	Dorsal	chr6
1277	Olfr1467	II	Dorsal	chr19
1279	Olfr1232	II	Ventral	chr2
1285	Olfr1312	II	Ventral	chr2
1310	Olfr1360	II	Ventral	chr13
1311	Olfr635	I	Dorsal	chr7
1312	Olfr508	II	Dorsal	chr7
1314	Olfr905	II	Dorsal	chr9
1316	Olfr1394	II	Ventral	chr11
1322	Olfr701	II	Ventral	chr7
1326	Olfr473	II	Ventral	chr7
1332	Olfr510	II	Dorsal	chr7
1347	Olfr212	II	Ventral	chr6
1349	Olfr126	II	Ventral	chr17
1352	Olfr1131	II	Dorsal	chr2
1355	Olfr482	II	Dorsal	chr7
1356	Olfr259	II	Ventral	chr2
1362	Olfr821	II	Dorsal	chr10
1363	Olfr1024	II	Dorsal	chr2
1378	Olfr659	I	Dorsal	chr7
1385	Olfr862	II	Ventral	chr9
1394	Olfr1167	II	Dorsal	chr2
1405	Olfr877	II	Dorsal	chr9
1434	Olfr1118	II	Ventral	chr2
1436	Olfr494	II	Dorsal	chr7
1447	Olfr1451	II	Dorsal	chr19
1457	Olfr1094	II	Dorsal	chr2
1465	Olfr802	II	Ventral	chr10
1485	Olfr153	II	Dorsal	chr2
1507	Olfr115	II	Ventral	chr17
1514	Olfr247	II	Dorsal	chr10
1527	Olfr402	II	Dorsal	chr11
1535	Olfr58	II	Ventral	chr9
1537	Olfr341	II	Dorsal	chr2
1553	Olfr270	II	Ventral	chr4
1568	Olfr857	II	Ventral	chr9
1570	Olfr628	I	Dorsal	chr7
1580	Olfr823	II	Ventral	chr10
1618	Olfr874	II	Dorsal	chr9
1636	Olfr107	II	Dorsal	chr17
1673	Olfr1180	II	Ventral	chr2
1678	Olfr1014	II	Ventral	chr2
1686	Olfr51	II	Dorsal	chr11
1691	Olfr518	II	Dorsal	chr7
1696	Olfr1351	II	Dorsal	chr10
1737	Olfr1333	II	Dorsal	chr4
1748	Olfr538	II	Ventral	chr7
