# Supplementary material for: Olfactory receptor accessory proteins play crucial roles in receptor function and gene choice
Source: eLife journal article supplement (doi:10.7554/elife.21895), 2017-03-06
Supplement: supp [file elife_poa_e21895_Supplementary_table_3.xlsx]

## Sheet: Sheet1
Supplementary Table 3
Abundance comparison
ANOVA summary
F	19.99
P value	< 0.0001
P value summary	****
Are differences among means statistically significant? (P < 0.05)	Yes
R square	0.03535
Tukey's multiple comparisons test	Mean Diff.	95% CI of diff.	Significant?	Summary
uOR vs. oOR	-1.749	-2.980 to -0.5192	Yes	**
uOR vs. NS	1.366	0.6018 to 2.129	Yes	****
oOR vs. NS	3.115	1.866 to 4.364	Yes	****
uOR probe mix
ANOVA summary
F	39.88
P value	< 0.0001
P value summary	****
Are differences among means statistically significant? (P < 0.05)	Yes
R square	0.8807
Tukey's multiple comparisons test	Mean Diff.	95% CI of diff.	Significant?	Summary
Het 1day vs. RTP1,2DKO 1 day	2.237	-0.2271 to 4.700	No	ns
Het 1day vs. Wild-type 21 day	-3.699	-6.058 to -1.340	Yes	***
Het 1day vs. RTP1,2DKO 21 day	2.477	0.1180 to 4.836	Yes	*
Het 1day vs. Wild-type 6 months	-5.296	-7.655 to -2.937	Yes	****
Het 1day vs. RTP1,2DKO 6 months	1.993	-0.4705 to 4.457	No	ns
RTP1,2DKO 1 day vs. Wild-type 21 day	-5.936	-8.295 to -3.577	Yes	****
RTP1,2DKO 1 day vs. RTP1,2DKO 21 day	0.2402	-2.119 to 2.599	No	ns
RTP1,2DKO 1 day vs. Wild-type 6 months	-7.533	-9.892 to -5.174	Yes	****
RTP1,2DKO 1 day vs. RTP1,2DKO 6 months	-0.2434	-2.707 to 2.220	No	ns
Wild-type 21 day vs. RTP1,2DKO 21 day	6.176	3.927 to 8.425	Yes	****
Wild-type 21 day vs. Wild-type 6 months	-1.597	-3.846 to 0.6522	No	ns
Wild-type 21 day vs. RTP1,2DKO 6 months	5.693	3.334 to 8.052	Yes	****
RTP1,2DKO 21 day vs. Wild-type 6 months	-7.773	-10.02 to -5.524	Yes	****
RTP1,2DKO 21 day vs. RTP1,2DKO 6 months	-0.4836	-2.843 to 1.875	No	ns
Wild-type 6 months vs. RTP1,2DKO 6 months	7.29	4.931 to 9.649	Yes	****
oOR probe mix
ANOVA summary	203.3
F	< 0.0001
P value	****
P value summary	Yes
Are differences among means statistically significant? (P < 0.05)	0.9751
R square
Tukey's multiple comparisons test	Mean Diff.	95% CI of diff.	Significant?	Summary
Het 1day vs. RTP1,2DKO 1 day	-1.817	-6.992 to 3.358	No	ns
Het 1day vs. Wild-type 21 day	-6.088	-11.26 to -0.9126	Yes	*
Het 1day vs. RTP1,2DKO 21 day	-17.66	-22.83 to -12.48	Yes	****
Het 1day vs. Wild-type 6 months	-8.457	-14.24 to -2.671	Yes	**
Het 1day vs. RTP1,2DKO 6 months	-52.99	-58.78 to -47.21	Yes	****
RTP1,2DKO 1 day vs. Wild-type 21 day	-4.271	-9.446 to 0.9045	No	ns
RTP1,2DKO 1 day vs. RTP1,2DKO 21 day	-15.84	-21.01 to -10.66	Yes	****
RTP1,2DKO 1 day vs. Wild-type 6 months	-6.64	-12.43 to -0.8539	Yes	*
RTP1,2DKO 1 day vs. RTP1,2DKO 6 months	-51.18	-56.96 to -45.39	Yes	****
Wild-type 21 day vs. RTP1,2DKO 21 day	-11.57	-16.74 to -6.393	Yes	****
Wild-type 21 day vs. Wild-type 6 months	-2.369	-8.156 to 3.417	No	ns
Wild-type 21 day vs. RTP1,2DKO 6 months	-46.91	-52.69 to -41.12	Yes	****
RTP1,2DKO 21 day vs. Wild-type 6 months	9.199	3.413 to 14.99	Yes	***
RTP1,2DKO 21 day vs. RTP1,2DKO 6 months	-35.34	-41.12 to -29.55	Yes	****
Wild-type 6 months vs. RTP1,2DKO 6 months	-44.54	-50.88 to -38.20	Yes	****
Olfr923 pS6
ANOVA summary	45.73
F	< 0.0001
P value	****
P value summary	Yes
Are differences among means statistically significant? (P < 0.05)	0.7329
R square
Tukey's multiple comparisons test	Mean Diff.	95% CI of diff.	Significant?	Summary
Het No odor vs. RTP1,2DKO No odor	-0.1584	-1.208 to 0.8915	No	ns
Het No odor vs. Het 1% Acetophenone	-3.533	-4.475 to -2.592	Yes	****
Het No odor vs. RTP1,2DKO 1% Acetophenone	0.2703	-0.9803 to 1.521	No	ns
RTP1,2DKO No odor vs. Het 1% Acetophenone	-3.375	-4.413 to -2.337	Yes	****
RTP1,2DKO No odor vs. RTP1,2DKO 1% Acetophenone	0.4287	-0.8957 to 1.753	No	ns
Het 1% Acetophenone vs. RTP1,2DKO 1% Acetophenone	3.804	2.563 to 5.044	Yes	****
Olfr1395 pS6
ANOVA summary	7.828
F	0.0002
P value	***
P value summary	Yes
Are differences among means statistically significant? (P < 0.05)	0.2624
R square
Tukey's multiple comparisons test	Mean Diff.	95% CI of diff.	Significant?	Summary
Het No odor vs. RTP1,2DKO No odor	-0.03384	-2.212 to 2.144	No	ns
Het No odor vs. Het1% TMT	-1.948	-3.657 to -0.2397	Yes	*
Het No odor vs. RTP1,2DKO 1%TMT	-2.532	-4.104 to -0.9606	Yes	***
RTP1,2DKO No odor vs. Het1% TMT	-1.914	-4.092 to 0.2635	No	ns
RTP1,2DKO No odor vs. RTP1,2DKO 1%TMT	-2.498	-4.571 to -0.4262	Yes	*
Het1% TMT vs. RTP1,2DKO 1%TMT	-0.584	-2.156 to 0.9875	No	ns
